# Supplementary material for: Reduced risk of recurrent myocardial infarction in homozygous carriers of the chromosome 9p21 rs1333049 C risk allele in the contemporary percutaneous coronary intervention era: a prospective observational study
Source: PubMed Central journal article supplement — BMJ Open. 2014 Aug 13;4(8):e005438. doi: 10.1136/bmjopen-2014-005438 (PMC4139637; doi:10.1136/bmjopen-2014-005438), 2014-08-13
Supplement: bmjopen-2014-005438.draft_revisions.pdf [file bmjopen-2014-005438.draft_revisions.pdf]

# BMJ Open

## Reduced risk of recurrent myocardial infarction in homozygous carriers of the chromosome 9p21 rs1333049 C risk allele in the contemporary percutaneous coronary intervention era: a prospective observational study

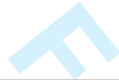

|                                 |                                                                                                                                                                                                                                                                                                                                                                                                                                                                                                                                                                                                                                                                                                                                                                                                                                                                                                                                                                                                                                                                                                                                                                                                                                                                                                                                                                                                                                                                                                                                                                          |
|---------------------------------|--------------------------------------------------------------------------------------------------------------------------------------------------------------------------------------------------------------------------------------------------------------------------------------------------------------------------------------------------------------------------------------------------------------------------------------------------------------------------------------------------------------------------------------------------------------------------------------------------------------------------------------------------------------------------------------------------------------------------------------------------------------------------------------------------------------------------------------------------------------------------------------------------------------------------------------------------------------------------------------------------------------------------------------------------------------------------------------------------------------------------------------------------------------------------------------------------------------------------------------------------------------------------------------------------------------------------------------------------------------------------------------------------------------------------------------------------------------------------------------------------------------------------------------------------------------------------|
| Journal:                        | <i>BMJ Open</i>                                                                                                                                                                                                                                                                                                                                                                                                                                                                                                                                                                                                                                                                                                                                                                                                                                                                                                                                                                                                                                                                                                                                                                                                                                                                                                                                                                                                                                                                                                                                                          |
| Manuscript ID:                  | bmjopen-2014-005438                                                                                                                                                                                                                                                                                                                                                                                                                                                                                                                                                                                                                                                                                                                                                                                                                                                                                                                                                                                                                                                                                                                                                                                                                                                                                                                                                                                                                                                                                                                                                      |
| Article Type:                   | Research                                                                                                                                                                                                                                                                                                                                                                                                                                                                                                                                                                                                                                                                                                                                                                                                                                                                                                                                                                                                                                                                                                                                                                                                                                                                                                                                                                                                                                                                                                                                                                 |
| Date Submitted by the Author:   | 09-Apr-2014                                                                                                                                                                                                                                                                                                                                                                                                                                                                                                                                                                                                                                                                                                                                                                                                                                                                                                                                                                                                                                                                                                                                                                                                                                                                                                                                                                                                                                                                                                                                                              |
| Complete List of Authors:       | Hara, Masahiko; Osaka University Graduate School of Medicine, Department of Cardiovascular Medicine<br>Sakata, Yasuhiko; Tohoku University Graduate School of Medicine, Department of Cardiovascular Medicine<br>Nakatani, Daisaku; Osaka University Graduate School of Medicine, Department of Cardiovascular Medicine<br>Suna, Shinichiro; Osaka University Graduate School of Medicine, Department of Cardiovascular Medicine<br>Usami, Masaya; Osaka University Graduate School of Medicine, Department of Cardiovascular Medicine<br>Matsumoto, Sen; Osaka University Graduate School of Medicine, Department of Cardiovascular Medicine<br>Ozaki, Kouichi; RIKEN Center for Integrative Medical Sciences, Laboratory for Cardiovascular Diseases<br>Nishino, Masami; Osaka Rosai Hospital, Cardiology<br>Sato, Hiroshi; Kwansai Gakuin University, School of Human Welfare Studies Health Care Center and Clinic<br>Kitamura, Tetsuhisa; Osaka University Graduate School of Medicine, Department of Social and Environmental Medicine<br>Nanto, Shinsuke; Osaka University Graduate School of Medicine, Department of Advanced Cardiovascular Therapeutics<br>Hamasaki, Toshimitsu; Osaka University Graduate School of Medicine, Department of Biomedical Statistics<br>Tanaka, Toshihiro; RIKEN Center for Integrative Medical Sciences, Laboratory for Cardiovascular Diseases<br>Hori, Ma; Osaka Medical Center for Cancer and Cardiovascular Diseases, Komuro, Issei; University of Tokyo Graduate School of Medicine, Department of Cardiovascular Medicine |
| <b>Primary Subject Heading</b>: | Cardiovascular medicine                                                                                                                                                                                                                                                                                                                                                                                                                                                                                                                                                                                                                                                                                                                                                                                                                                                                                                                                                                                                                                                                                                                                                                                                                                                                                                                                                                                                                                                                                                                                                  |
| Secondary Subject Heading:      | Genetics and genomics                                                                                                                                                                                                                                                                                                                                                                                                                                                                                                                                                                                                                                                                                                                                                                                                                                                                                                                                                                                                                                                                                                                                                                                                                                                                                                                                                                                                                                                                                                                                                    |
| Keywords:                       | Acute myocardial infarction, Secondary prevention, Single nucleotide polymorphism, 9p21                                                                                                                                                                                                                                                                                                                                                                                                                                                                                                                                                                                                                                                                                                                                                                                                                                                                                                                                                                                                                                                                                                                                                                                                                                                                                                                                                                                                                                                                                  |
|                                 |                                                                                                                                                                                                                                                                                                                                                                                                                                                                                                                                                                                                                                                                                                                                                                                                                                                                                                                                                                                                                                                                                                                                                                                                                                                                                                                                                                                                                                                                                                                                                                          |

1  
2  
3  
4  
5  
6  
7  
8  
9  
10  
11  
12  
13  
14  
15  
16  
17  
18  
19  
20  
21  
22  
23  
24  
25  
26  
27  
28  
29  
30  
31  
32  
33  
34  
35  
36  
37  
38  
39  
40  
41  
42  
43  
44  
45  
46  
47  
48  
49  
50  
51  
52  
53  
54  
55  
56  
57  
58  
59  
60

SCHOLARONE™  
Manuscripts

For peer review only

Original Research Article

***Reduced risk of recurrent myocardial infarction in homozygous carriers  
of the chromosome 9p21 rs1333049 C risk allele in the contemporary  
percutaneous coronary intervention era: a prospective observational  
study***

Masahiko Hara, MD <sup>1)</sup>, Yasuhiko Sakata, MD, PhD <sup>1)2)3)</sup>, Daisaku Nakatani,  
MD, PhD <sup>1)</sup>, Shinichiro Suna, MD, PhD <sup>1)</sup>, Masaya Usami, MD, PhD <sup>1)</sup>, Sen  
Matsumoto, MD, PhD <sup>1)</sup>, Kouichi Ozaki, PhD <sup>4)</sup>, Masami Nishino, MD, PhD <sup>5)</sup>,  
Hiroshi Sato, MD, PhD <sup>6)</sup>, Tetsuhisa Kitamura, MD, MSc, DrPH <sup>7)</sup>, Shinsuke  
Nanto, MD, PhD <sup>1)2)</sup>, Toshimitsu Hamasaki, PhD <sup>8)</sup>, Toshihiro Tanaka, MD,  
PhD <sup>4)9)</sup>, Masatsugu Hori, MD, PhD <sup>10)</sup>, Issei Komuro, MD, PhD <sup>11)</sup>, on behalf of  
the OACIS Investigators

1) Department of Cardiovascular Medicine, Osaka University Graduate School of  
Medicine, Suita, Japan

2) Department of Advanced Cardiovascular Therapeutics, Osaka University Graduate

1  
2  
3  
4  
5  
6 School of Medicine, Suita, Japan  
7

8  
9 3) Department of Cardiovascular Medicine, Tohoku University Graduate School of  
10  
11 Medicine, Sendai, Japan  
12

13  
14 4) Laboratory for Cardiovascular Diseases, RIKEN Center for Integrative Medical  
15  
16 Sciences, Yokohama, Japan.  
17

18  
19 5) Division of Cardiology, Osaka Rosai Hospital, Sakai, Japan  
20

21  
22 6) School of Human Welfare Studies, Kwansai Gakuin University, Nishinomiya, Japan  
23

24  
25 7) Division of Environmental Medicine and Population Sciences, Department of Social  
26  
27 and Environmental Medicine, Osaka University Graduate School of Medicine, Suita,  
28  
29 Japan  
30  
31

32  
33 8) Department of Biomedical Statistics, Osaka University Graduate School of Medicine,  
34  
35 Suita, Japan  
36  
37

38  
39 9) Department of Human Genetics and Disease Diversity, Tokyo Medical and Dental  
40  
41 University Graduate School of Medical and Dental Sciences, Tokyo, Japan  
42  
43

44  
45 10) Osaka Prefectural Hospital Organization Osaka Medical Center for Cancer and  
46  
47 Cardiovascular Diseases, Osaka, Japan  
48  
49

50  
51 11) Department of Cardiovascular Medicine, The University of Tokyo Graduate School  
52  
53 of Medicine, Tokyo, Japan  
54  
55  
56  
57  
58  
59  
60

1  
2  
3  
4  
5  
6  
7  
8  
9 **Key Words:** 9p21, Acute myocardial infarction, Secondary prevention, and Single  
10  
11  
12 nucleotide polymorphism.  
13

14  
15  
16  
17  
18 Running Title: 9p21 SNP and ReMI  
19

20  
21  
22  
23 Total word count of the text: 2733 words  
24  
25  
26  
27

28  
29 **Address for correspondence:**  
30

31  
32 Yasuhiko Sakata, MD, PhD  
33

34  
35 Department of Cardiovascular Medicine  
36

37  
38 Tohoku University Graduate School of Medicine, 1-1 Seiryomachi, Aoba-ku, Sendai  
39

40  
41 980-8574, Japan.  
42

43  
44 Phone: (81)-22-717-7152  
45

46  
47 Fax: (81)-22-717-7156  
48

49  
50 E-mail: sakatayk@cardiology.med.osaka-u.ac.jp, sakatayk@cardio.med.tohoku.ac.jp  
51  
52  
53  
54  
55  
56  
57  
58  
59  
60

*Abstract*

**Objectives:** It is controversial whether chromosome 9p21 single nucleotide polymorphism (SNP), susceptibility variants for acute myocardial infarction (AMI) in the primary prevention setting, is associated with recurrent myocardial infarction (ReMI) in the secondary prevention setting. The purpose of this study is to evaluate the impact of chromosome 9p21 SNP on ReMI in patients receiving secondary prevention programs after AMI.

**Design:** A prospective observational study.

**Setting:** Osaka Acute Coronary Insufficiency Study (OACIS) in Japan.

**Participants:** 2,022 patients from OACIS database.

**Interventions:** Genotyping of the 9p21 rs1333049 variant.

**Primary outcome measures:** ReMI event after survival discharge for 1 year.

**Results:** A total of 43 ReMI occurred during the 1-year follow-up period. Although the rs1333049 C allele had an increased susceptibility to their first AMI in an additive model when compared with 1373 healthy controls (odds ratio 1.20, 95% confidence interval 1.09-1.33,  $p=2.3 \times 10^{-4}$ ), patients with the CC genotype had a lower incidence of ReMI at 1-year after discharge of AMI (log-rank  $p=0.005$ ). The adjusted hazard ratios of the CC genotype as compared with CG/GG genotypes was 0.20 (0.06-0.65,  $p=0.007$ ).

1  
2  
3  
4  
5  
6 Subgroup analysis demonstrated that the association between the rs1333049 CC  
7  
8 genotype and lower incidence of 1-year ReMI was common to all subgroups.  
9  
10

11 **Conclusions:** Homozygous carriers of the rs1333049 C allele on chromosome 9p21  
12  
13 showed a reduced risk of 1-year ReMI in the contemporary percutaneous coronary  
14  
15 intervention era, although the C allele had conferred susceptibility to their first AMI.  
16  
17  
18  
19  
20  
21  
22  
23  
24  
25  
26  
27  
28  
29  
30  
31  
32  
33  
34  
35  
36  
37  
38  
39  
40  
41  
42  
43  
44  
45  
46  
47  
48  
49  
50  
51  
52  
53  
54  
55  
56  
57  
58  
59  
60

**Strengths and limitations of this study**

- This is the first study to clearly show a change of the susceptibility risk of the 9p21 variant to acute myocardial infarction between the primary and secondary prevention settings in percutaneous coronary intervention era.
- Data regarding the mechanism and culprit lesion of re-myocardial infarction were not available.



## INTRODUCTION

Acute myocardial infarction (AMI) is one of the leading causes of death and disability worldwide.<sup>1</sup> AMI is associated with a positive family history as well as several traditional coronary risk factors including diabetes, hypertension, dyslipidemia, and smoking, suggesting that the pathogenesis of AMI has a substantial genetic component.<sup>2</sup> Genome-wide association studies (GWAS) have identified several genetic loci that confer susceptibility to AMI and coronary artery disease (CAD) in the primary prevention setting.<sup>3-7</sup> Among these genetic variants, single nucleotide polymorphisms (SNPs) on chromosome 9p21 are the most common and significant susceptibility risk factors for AMI and CAD, regardless of race.<sup>3-11</sup> However, it remains controversial whether chromosome 9p21 SNPs are associated with recurrent myocardial infarction (ReMI) in post-AMI patients receiving the evidence-based secondary prevention programs.<sup>12-14</sup>

For example, the Italian Genetic study and TexGen registry revealed that 9p21 genetic variation was not associated with ReMI events after early-onset myocardial infarction and acute coronary syndrome (ACS), respectively,<sup>13-14</sup> while the GRACE genetic study showed that risk allele carriers of 9p21 SNPs had a higher incidence of ReMI after ACS.<sup>12</sup> One possible explanation for this discrepancy among these three

1  
2  
3  
4  
5  
6 studies is an involvement of in-hospital ReMI as an endpoint. It is reported that 9p21  
7  
8  
9 SNPs increase the risk of AMI onset by promoting the development and progression of  
10  
11  
12 coronary plaque deposition, rather than increasing susceptibility to plaque rupture.<sup>9-14</sup>  
13  
14  
15 Thus, inclusion of acute phase ReMI might have made the interpretation difficult in  
16  
17  
18 these 9p21 variant studies, as most of ReMI occurring during the acute phase of AMI  
19  
20  
21 were likely caused by 9p21-independent mechanisms, such as re-occlusion of the culprit  
22  
23  
24 lesion and/or thrombosis. Therefore, to simply assess the susceptibility impact of 9p21  
25  
26  
27 to ReMI in the secondary prevention settings, it may be better to include post-AMI  
28  
29  
30 patients only who survived the acute stage and received the state of the art secondary  
31  
32  
33 prevention program after discharge.

34  
35 The aim of the present study was to investigate the susceptibility impact of 9p21  
36  
37  
38 genetic variation on ReMI in consecutive 2,022 patients with a first AMI who were  
39  
40  
41 registered in the Osaka Acute Coronary Insufficiency Study (OACIS),<sup>15-19</sup> treated with  
42  
43  
44 emergent percutaneous coronary intervention (PCI), and discharged alive.

## 45 46 47 48 49 **METHODS**

### 50 51 52 **The OACIS**

53  
54  
55 The OACIS is a multicenter, prospective, observational registry for AMI in Japan that  
56  
57  
58  
59  
60

1  
2  
3  
4  
5  
6 was initiated in April 1998 among 25 collaborating hospitals. The OACIS is designed to  
7  
8  
9 assess patient demographics including genomic information, therapeutic procedures,  
10  
11 and subsequent clinical events in AMI patients. All study candidates were informed  
12  
13 about data collection, blood sampling, and genotyping, and provided written informed  
14  
15 consent. Research cardiologists and trained research nurses recorded data using a  
16  
17 specific reporting form. The diagnosis of AMI was based on the World Health  
18  
19 Organization criteria,<sup>20</sup> which required 2 of the following 3 criteria to be met: (1)  
20  
21 clinical history of central chest pressure, pain, or tightness lasting  $\geq 30$  min; (2) ST  
22  
23 segment elevation  $>0.1$  mV in at least one standard or 2 precordial leads; and (3) a rise  
24  
25 in serum creatinine phosphokinase concentration to more than twice the normal  
26  
27 laboratory value. The OACIS is registered to the University Hospital Medical  
28  
29 Information Network Clinical Trials Registry (UMIN-CTR) in Japan (ID:  
30  
31 UMIN000004575). Other details of OACIS are described elsewhere.<sup>15-19</sup>  
32  
33  
34  
35  
36  
37  
38  
39  
40  
41  
42  
43  
44  
45  
46

### 47 **Study design**

48  
49 Among 10,074 consecutive AMI patients registered in the OACIS between April 1998  
50  
51 and April 2011, 2,045 patients who had a first AMI, underwent emergent PCI, survived  
52  
53 to discharge, and gave a written informed consent to the study were enrolled in the  
54  
55  
56  
57  
58  
59  
60

1  
2  
3  
4  
5  
6 present study. Exclusion criteria included a history of previous myocardial infarction or  
7  
8  
9 PCI, in-hospital death cases, and lack of written informed consent for genetic study and  
10  
11  
12 deoxyribonucleic acid (DNA) sampling. Genomic DNA was extracted from peripheral  
13  
14  
15 blood samples using a commercially available kit (QIAamp DNA Blood Midi Kit;  
16  
17  
18 Qiagen, Hilden, Germany). Patients were genotyped for the rs1333049 SNP of  
19  
20  
21 chromosome 9p21 using the multiplex-polymerase chain reaction-based invader assay  
22  
23  
24 as previously described.<sup>21</sup> The reason why we focused on the rs1333049 was that it is  
25  
26  
27 the most widely studied 9p21 genetic variants in both the primary and secondary  
28  
29  
30 prevention settings.<sup>8,10-12,14</sup> We also confirmed that rs1333049 is in linkage  
31  
32  
33 disequilibrium with other major 9p21 SNPs in the OACIS registry (Supplementary  
34  
35  
36 Figure 1). Finally, the genotyping success rate for rs1333049 was 98.9% and 2,022  
37  
38  
39 patients were successfully genotyped and analyzed for the susceptibility to ReMI within  
40  
41  
42 a year after survival discharge (Figure 1). To validate the association of the rs1333049  
43  
44  
45 SNP with the first AMI, we performed a case-control association study between the  
46  
47  
48 present study population and healthy Japanese controls. Control blood samples of  
49  
50  
51 healthy Japanese adults (n=1,373, mean age, 38.6 years old, 59% male) were obtained  
52  
53  
54 from the Health Science Research Resources Bank (Osaka, Japan). The patient  
55  
56  
57 backgrounds and primary preventive medications were not adjusted in this case-control  
58  
59  
60

1  
2  
3  
4  
5  
6 association study in the primary prevention setting, since these data were not available  
7  
8  
9 in commercially obtained healthy controls and medications before first AMI were not  
10  
11  
12 available in our study population in detail.  
13

### 14 15 16 17 18 **Statistical analysis** 19

20  
21 Categorical variables were compared by the chi-square test, and continuous variables  
22  
23 were compared by the Kruskal-Wallis test. The impact of the rs1333049 genotype on  
24  
25 the onset of AMI was assessed in both the primary and secondary prevention settings.  
26  
27 The impact of rs1333049 on the onset of AMI was calculated as odds ratios (OR) and  
28  
29 95% confidence intervals (CI) in an additive model (OR per C allele increase). In the  
30  
31 secondary prevention analysis, the Kaplan-Meier method was used to estimate event  
32  
33 rates. Because the Kaplan-Meier analysis revealed that the incidence of ReMI differed  
34  
35 between the CC and CG/GG genotypes of rs1333049 (Figure 2), the differences  
36  
37 between CC and CG/GG genotypes were assessed by the log-rank tests. In addition, a  
38  
39 Cox regression model was used to compare the 1-year prognostic impacts between the  
40  
41 rs1333049 CC and CG/GG genotypes based on the estimate hazard ratios (HR) and  
42  
43 95% CI. Multivariate Cox regression analysis was performed to reduce the confounding  
44  
45 effects of variations in patient backgrounds using age, gender, body mass index,  
46  
47  
48  
49  
50  
51  
52  
53  
54  
55  
56  
57  
58  
59  
60

1  
2  
3  
4  
5  
6 ST-elevation myocardial infarction, diabetes, hypertension, dyslipidemia, smoking,  
7  
8  
9 target lesion, multivessel disease, peak creatinine phosphokinase, and prescription of  
10  
11  
12 angiotensin-converting enzyme inhibitor, angiotensin receptor blocker, beta-blockers,  
13  
14  
15 calcium channel blockers, statins, diuretics, and dual anti-platelet agents as covariates.  
16  
17  
18 Hence, the final multivariate model included all the above mentioned covariates. The  
19  
20  
21 gene-drug interactions were evaluated using  $p$  for interaction between genotype and  
22  
23  
24 each drug tested. Statistical significance was set as  $p < 0.05$  for comparison of patient  
25  
26  
27 background or gene-drug interaction. Bonferroni correction for multiple testing was  
28  
29  
30 employed during the secondary prevention analysis and statistical significance was set  
31  
32  
33 as  $p < 0.025$  (0.05 divided by the number of independent testing; log-rank test and  
34  
35  
36 multiple Cox regression analysis). All statistical analyses were performed using SAS  
37  
38  
39 version 9.3 (SAS Institute Inc., Cary, NC) or R software packages version 2.15.1 (R  
40  
41  
42 Development Core Team).

## 43 44 45 46 **RESULTS**

47  
48  
49 Patient characteristics are shown in Table 1. Median age was 65 years, 76.8% were male,  
50  
51  
52 87.7% had ST-elevation myocardial infarction. No significant differences in patient  
53  
54  
55 background based on rs1333049 genotypes were detected.  
56  
57  
58  
59  
60

1  
2  
3  
4  
5  
6 In the primary prevention setting, the rs1333049 C allele was associated with  
7  
8 increased susceptibility to AMI (OR 1.20 per C allele increase, 95% CI 1.09-1.33, p=  
9  
10 2.3\*10<sup>-4</sup>; and OR 1.38 CC vs CG/GG, 95% CI 1.17-1.62, p=8.7\*10<sup>-5</sup>) compared to  
11  
12 1,373 healthy Japanese controls (Figure 3). The frequencies of the CC, CG, and GG  
13  
14 genotypes of rs1333049 were 28.4% (574/2022), 49.3% (997/2022), and 22.3%  
15  
16 (451/2022), respectively, among the study population, and 22.4% (307/1373), 52.3%  
17  
18 (718/1373), and 25.3% (348/1373), respectively, among the healthy controls.  
19  
20  
21  
22  
23  
24

25  
26 In the secondary prevention setting, 43 ReMI (4 for CC, 30 for CG, and 9 for GG  
27  
28 genotypes) occurred during a 1-year follow-up period after survival discharge for their  
29  
30 first AMI. Kaplan-Meier analysis revealed that incidence of ReMI differed between  
31  
32 patients with the CC and CG/GG genotypes (log-rank p=0.005) (Figure 2).  
33  
34 Multivariate Cox regression analysis revealed that the CC genotype was associated with  
35  
36 a lower risk of ReMI after survival discharge compared to the CG/GG genotypes  
37  
38 (adjusted HR 0.20, 95% CI 0.06-0.65, p=0.007). Subgroup analysis demonstrated that  
39  
40 the association between the rs1333049 CC genotype and lower incidence of 1-year  
41  
42 ReMI was common to all subgroups, and no significant gene-drug interactions were  
43  
44 detected (Figure 4).  
45  
46  
47  
48  
49  
50  
51  
52  
53  
54  
55  
56  
57  
58  
59  
60

## DISCUSSION

The present study demonstrated that, in the secondary prevention setting of AMI, homozygous carriers of the rs1333049 risk allele (CC genotype) on chromosome 9p21 had a reduced incidence of ReMI, whereas the C allele did have conferred susceptibility to their first AMI. This result is of clinical importance because this is the first study to clearly show a change of the susceptibility risk of the 9p21 variant to AMI between before and after the first AMI, namely, between the primary and secondary prevention settings.

Historically, 9p21 SNP was identified as a susceptibility variant of CAD with GWAS using data from Wellcome Trust Case Control Consortium in 2007.<sup>3</sup> Many other GWASs have also revealed the same association between 9p21 SNP and CAD and/or myocardial infarction.<sup>3-8</sup> In addition, one report by Chan et al suggested the presence of common pathway to develop CAD and myocardial infarction via 9p21 SNP.<sup>11</sup> Thus, 9p21 SNP is now considered as one of the most robust susceptibility variants of myocardial infarction and/or CAD in the primary prevention setting. To date, three major studies have assessed the association between 9p21 genetic variation and ReMI rates after ACS (Table 2)<sup>12-14</sup>: the Italian Genetic study and TexGen registry reported a lack of association with ReMI events after early-onset myocardial infarction and ACS



1  
2  
3  
4  
5  
6 (fraction unknown), respectively,<sup>13-14</sup> while the GRACE genetic study suggested a  
7  
8  
9 susceptibility risk of 9p21 SNPs for ReMI after ACS (STEMI 27.2%, non-STEMI  
10  
11  
12 43.3%, and unstable angina 29.5%).<sup>12</sup> Since Buyschaert et al. also reported that the  
13  
14  
15 statistical significance of the susceptibility risk of 9p21 disappeared after full  
16  
17  
18 adjustment with patient background in the GRACE genetic study,<sup>12</sup> it is possible to  
19  
20  
21 interpret the results of these 3 studies as a lack of 9p21 susceptibility to reoccurrence of  
22  
23  
24 AMI in post-ACS patients.<sup>12-14</sup> These findings are of clinical significance because they  
25  
26  
27 suggested a modification of the genetic risk of 9p21 by secondary prevention programs  
28  
29  
30 after ACS. However, these studies only examined the susceptibility impact of 9p21  
31  
32  
33 SNPs to the reoccurrence of AMI without comparison with that to the first AMI (ACS)  
34  
35  
36 in their study cohort, which could be a limitation to discuss modification of genetic risk  
37  
38  
39 with secondary prevention programs.

40  
41 In this point of view, it is noteworthy that the present study clearly showed a change  
42  
43  
44 of the 9p21 susceptibility risk to AMI between before and after the first onset of AMI in  
45  
46  
47 the same population. In the present study, the results showed that the rs1333049 C allele  
48  
49  
50 was associated with onset of the first AMI (OR 1.20, 95% CI 1.09-1.33,  $p=2.3 \times 10^{-4}$ ),  
51  
52  
53 which was consistent with the results of several previous studies in the primary  
54  
55  
56 prevention settings.<sup>3-8</sup> Interestingly, however, the present study also demonstrated that  
57  
58  
59  
60

1  
2  
3  
4  
5  
6 patients with the CC genotype had a lower incidence of 1-year ReMI (adjusted HR, 0.20,  
7  
8  
9 95% CI 0.06-0.65,  $p=0.007$ ) as a novel finding. Thus, the results suggested that the risk  
10  
11  
12 of 9p21 variant seen in the primary prevention setting of the present study population  
13  
14  
15 was modified in the secondary prevention setting. However, it should be discussed why  
16  
17  
18 the 9p21 rs1333049 CC genotype was associated with reduced incidence of ReMI in the  
19  
20  
21 present study, while not in the previous 3 studies.<sup>12-14</sup> One possible explanation for this  
22  
23  
24 discrepancy between the previous and our studies is that we only include post-AMI  
25  
26  
27 patient who were treated with emergent PCI on admission and survived to discharge,  
28  
29  
30 whereas all previous studies included all of the patients hospitalized for AMI or ACS  
31  
32  
33 and thus include ReMI during the acute stage of ACS as an endpoint. Considering that  
34  
35  
36 ReMI occurring during the acute stage of ACS was likely associated with patient or  
37  
38  
39 procedure-related backgrounds such as re-occlusion of the culprit lesion due to  
40  
41  
42 thrombus or mechanical acute closures rather than genetic background, inclusion of  
43  
44  
45 these ReMI might have made the interpretation of the results difficult in the previous  
46  
47  
48 studies. In addition, patient selection limited to those treated with primary PCI for the  
49  
50  
51 first AMI in the present study might have helped to more clearly elucidate the  
52  
53  
54 9p21-related susceptibility to ReMI in the secondary prevention cohort.

55 The 9p21 locus is adjacent to the tumor suppressor genes CDKN2A and CDKN2B.<sup>8</sup>  
56  
57  
58  
59  
60

1  
2  
3  
4  
5  
6 Although the mechanism by which variation in the 9p21 locus increases AMI  
7  
8 susceptibility in the primary prevention setting remains unclear,<sup>8</sup> the evidence-based  
9  
10 secondary prevention programs might have masked the susceptibility risk of the 9p21  
11  
12 rs1333049 C allele to ReMI after ACS in the present study (Figure 2), possibly via  
13  
14 stabilizing coronary plaques.<sup>9-14,22-23</sup> Indeed, Do et al. reported that the impact of 9p21  
15  
16 genetic variation can be modified by increasing the dietary intake of vegetables,<sup>24</sup>  
17  
18 suggesting a role of secondary prevention programs including dietary practice. Thus,  
19  
20 further studies are warranted to investigate whether and how the secondary prevention  
21  
22 programs with evidence-based medication and lifestyle modification can reduce the risk  
23  
24 of ReMI in patients with 9p21 genetic variants in the near future. In particular, the  
25  
26 potential interaction of the rs1333049 SNP with secondary prevention medications  
27  
28 warrants further investigation, because gene-drug interactions have already been  
29  
30 detected in cardiovascular patients treated with warfarin, clopidogrel, and statin.<sup>25-27</sup>  
31  
32  
33  
34  
35  
36  
37  
38  
39  
40  
41  
42

43  
44 The present study has several limitations that warrant mention. First, because our  
45  
46 study population only consisted of patients who provided written informed consent at  
47  
48 survival discharge, there may have been selection bias as well as survival bias since high  
49  
50 risk patients carrying C allele might have died more frequently than patients with GG  
51  
52 genotype during hospitalization. Second, our study lacked a replication cohort. However,  
53  
54  
55  
56  
57  
58  
59  
60

1  
2  
3  
4  
5  
6 it is usually difficult to have a validation cohort in a prospective observational study  
7  
8  
9 design.<sup>28</sup> Indeed, all studies presented in Table 2 did not include a replication cohort.  
10  
11  
12 Third, therapeutic regiment of AMI such as of coronary stenting and dual-antiplatelet  
13  
14 therapy advanced and varied across the ages. Forth, data regarding the mechanism and  
15  
16 culprit lesion of ReMI were not available. Since ReMI can occur through a variety of  
17  
18 mechanisms such as acute stent thrombosis of culprit lesion, excessive intimal  
19  
20 proliferation of stented vessels, and plaque rupture of new atherosclerotic lesion,  
21  
22 detailed analysis for the mechanism of ReMI is ideal. Finally, it is possible that  
23  
24 unmeasured confounding factors influenced the study outcomes due to the inherent  
25  
26 nature of observational registry. The data should be interpreted within the context of  
27  
28 these potential limitations.  
29  
30  
31  
32  
33  
34  
35  
36  
37  
38  
39  
40

## 41 **Conclusions**

42  
43 We demonstrated that homozygous carriers of AMI susceptibility variant rs1333049  
44  
45 SNP C allele on chromosome 9p21 showed a reduced risk of 1-year ReMI after survival  
46  
47 discharge, suggesting a modification of genetic susceptibility of AMI with secondary  
48  
49 prevention programs.  
50  
51  
52  
53  
54  
55  
56  
57  
58  
59  
60

## Acknowledgements

We thank Mariko Kishida, Rie Nagai, Nanase Muraoka, Hiroko Takemori, Akiko Yamagishi, Kumiko Miyoshi, Chizuru Hamaguchi, Hiroko Machida, Mariko Yoneda, Nagisa Yoshioka, Mayuko Tomatsu, Kyoko Tatsumi, Tomoko Mizuoka, Shigemi Kohara, Junko Tsugawa, Junko Isotani, Sachiko Ashibe, and all other OACIS research coordinators and nurses for their excellent assistance with data collection.

## Contributors

All authors contributed to the work as follows: (1) made substantial contributions to the study concept and design, acquisition of data, or analysis and interpretation of data; (2) drafted the article or revised it critically by providing intellectual content; and (3) approved the final version of the manuscript to be published.

## Funding

This work was supported by Grants-in-Aid for University and Society Collaboration (#19590816 and #19390215) from the Japanese Ministry of Education, Culture, Sports, Science and Technology, Tokyo, Japan.

**Competing interests**

Dr. Komuro has received research grants and speaker's fees from Takeda Pharmaceutical Company, Astellas Pharma, DAIICHI SANKYO COMPANY, Boehringer Ingelheim, Novartis Pharma and Shionogi. No other authors have relationships with industry to disclose or financial associations that might pose a conflict of interest in connection with the submitted article.

**Ethics approval**

The study protocol complied with the Helsinki Declaration and the guidelines for genomic/genetic research issued by the Japanese government. The study was approved by the institutional ethical committee of each participating institution.

**Patient consent**

Obtained.

**Provenance and peer review**

Not commissioned; externally peer reviewed.

**Data sharing statement**

Data and documentation for the OACIS registry are available at the study coordination office, Department of Cardiovascular Medicine, Osaka University Graduate School of Medicine, Suita, Japan.

**Open Access**

This is an Open Access article distributed in accordance with the Creative Commons Attribution Non Commercial (CC BY-NC 3.0) license, which permits others to distribute, remix, adapt, build upon this work noncommercially, and license their derivative works on different terms, provided the original work is properly cited and the use is non-commercial. See: <http://creativecommons.org/licenses/by-nc/3.0/>

## References

1. White HD, Chew DP. Acute myocardial infarction. *Lancet* 2008;372:570-584.
2. Marenberg ME, Risch N, Berkman LF, et al. Genetic susceptibility to death from coronary heart disease in a study of twins. *N Engl J Med* 1994;330:1041-1046.
3. Samani NJ, Erdmann J, Hall AS, et al; WTCCC and the Cardiogenics Consortium. Genomewide association analysis of coronary artery disease. *N Engl J Med* 2007;357:443-453.
4. McPherson R, Pertsemlidis A, Kavaslar N, et al. A common allele on chromosome 9 associated with coronary heart disease. *Science* 2007;316:1488-1491.
5. Helgadottir A, Thorleifsson G, Manolescu A, et al. A common variant on chromosome 9p21 affects the risk of myocardial infarction. *Science* 2007;316:1491-1493.
6. Myocardial Infarction Genetics Consortium, Kathiresan S, Voight BF, Purcell S, et al. Genome-wide association of early-onset myocardial infarction with single nucleotide polymorphisms and copy number variants. *Nat Genet* 2009;41:334-341.
7. Schunkert H, König IR, Kathiresan S, et al; CARDIoGRAM Consortium. Large-scale association analysis identifies 13 new susceptibility loci for coronary artery disease. *Nat Genet* 2011;43:333-338.



- 1  
2  
3  
4  
5  
6 8. Schunkert H, Götz A, Braund P, et al; Cardiogenics Consortium. Repeated  
7  
8  
9 replication and a prospective meta-analysis of the association between chromosome  
10  
11 9p21.3 and coronary artery disease. *Circulation* 2008;117:1675-1684.  
12  
13  
14 9. Horne BD, Carlquist JF, Muhlestein JB, et al. Association of variation in the  
15  
16 chromosome 9p21 locus with myocardial infarction versus chronic coronary artery  
17  
18 disease. *Circ Cardiovasc Genet* 2008;1:85-92.  
19  
20  
21 10. Dandona S, Stewart AF, Chen L, et al. Gene dosage of the common variant 9p21  
22  
23 predicts severity of coronary artery disease. *J Am Coll Cardiol* 2010;56:479-486.  
24  
25  
26 11. Chan K, Patel RS, Newcombe P, et al. Association between the chromosome 9p21  
27  
28 locus and angiographic coronary artery disease burden: a collaborative  
29  
30 meta-analysis. *J Am Coll Cardiol* 2013;61:957-970.  
31  
32  
33 12. Buyschaert I, Carruthers KF, Dunbar DR, et al. A variant at chromosome 9p21 is  
34  
35 associated with recurrent myocardial infarction and cardiac death after acute  
36  
37 coronary syndrome: the GRACE Genetics Study. *Eur Heart J* 2010;31:1132-1141.  
38  
39  
40 13. Ardissino D, Berzuini C, Merlini PA, et al; Italian Atherosclerosis, Thrombosis and  
41  
42 Vascular Biology Investigators. Influence of 9p21.3 genetic variants on clinical and  
43  
44 angiographic outcomes in early-onset myocardial infarction. *J Am Coll Cardiol*  
45  
46 2011;58:426-434.  
47  
48  
49  
50  
51  
52  
53  
54  
55  
56  
57  
58  
59  
60

- 1  
2  
3  
4  
5  
6 14. Virani SS, Brautbar A, Lee VV, et al. Chromosome 9p21 single nucleotide  
7  
8 polymorphisms are not associated with recurrent myocardial infarction in patients  
9  
10 with established coronary artery disease. *Circ J* 2012;76:950-956.  
11  
12  
13  
14 15. Hara M, Sakata Y, Nakatani D, et al; Osaka Acute Coronary Insufficiency Study  
15  
16 (OACIS) Investigators. Low levels of serum n-3 polyunsaturated fatty acids are  
17  
18 associated with worse heart failure-free survival in patients after acute myocardial  
19  
20 infarction. *Circ J* 2013;1:153-162.  
21  
22  
23  
24 25. Nakatani D, Sakata Y, Suna S, et al; Osaka Acute Coronary Insufficiency Study  
26  
27 (OACIS) Investigators. Impact of beta blockade therapy on long-term mortality after  
28  
29 ST-segment elevation acute myocardial infarction in the percutaneous coronary  
30  
31 intervention era. *Am J Cardiol* 2013;111:457-464.  
32  
33  
34  
35 36. Matsumoto S, Nakatani D, Sakata Y, et al; Osaka Acute Coronary Insufficiency  
37  
38 Study (OACIS) Group. Elevated serum heart-type fatty acid-binding protein in the  
39  
40 convalescent stage predicts long-term outcome in patients surviving acute  
41  
42 myocardial infarction. *Circ J* 2013;77:1026-1032.  
43  
44  
45  
46 47. Kitamura T, Sakata Y, Nakatani D, et al. Living alone and risk of cardiovascular  
48  
49 events following discharge after acute myocardial infarction in Japan. *J Cardiol*  
50  
51 2013;62:257-262.  
52  
53  
54  
55  
56  
57  
58  
59  
60

- 1  
2  
3  
4  
5  
6 19. Usami M, Sakata Y, Nakatani D, et al. Clinical impact of acute hyperglycemia on  
7  
8 development of diabetes mellitus in non-diabetic patients with acute myocardial  
9  
10 development of diabetes mellitus in non-diabetic patients with acute myocardial  
11  
12 infarction. *J Cardiol* 2013 [Epub ahead of print] (DOI: 10.1016/j.jjcc.2013.08.012.)  
13  
14  
15 20. No authors listed. Nomenclature and criteria for diagnosis of ischemic heart disease.  
16  
17 Report of the Joint International Society and Federation of Cardiology/World Health  
18  
19 Organization task force on standardization of clinical nomenclature. *Circulation*  
20  
21 1979;59:607-609  
22  
23  
24  
25  
26 21. Ohnishi Y, Tanaka T, Ozaki K, et al. A high-throughput SNP typing system for  
27  
28 genome-wide association studies. *J Hum Genet* 2001;46:471-477.  
29  
30  
31  
32 22. Kushner FG, Hand M, Smith SC Jr, et al; American College of Cardiology  
33  
34 Foundation/American Heart Association Task Force on Practice Guidelines. 2009  
35  
36 Focused Updates: ACC/AHA Guidelines for the Management of Patients With  
37  
38 ST-Elevation Myocardial Infarction (updating the 2004 Guideline and 2007 Focused  
39  
40 Update) and ACC/AHA/SCAI Guidelines on Percutaneous Coronary Intervention  
41  
42 (updating the 2005 Guideline and 2007 Focused Update): a report of the American  
43  
44 College of Cardiology Foundation/American Heart Association Task Force on  
45  
46 Practice Guidelines. *Circulation* 2009;120:2271-2306.  
47  
48  
49  
50  
51  
52  
53  
54  
55  
56  
57  
58  
59  
60

- 1  
2  
3  
4  
5  
6 23. Tsunoda R, Sakamoto T, Kojima S, et al. Recurrence of angina pectoris after  
7  
8 percutaneous coronary intervention is reduced by statins in Japanese patients. *J*  
9  
10 *Cardiol* 2011;58:208-215.  
11  
12
- 13  
14 24. Do R, Xie C, Zhang X, et al; INTERHEART investigators. The effect of  
15  
16 chromosome 9p21 variants on cardiovascular disease may be modified by dietary  
17  
18 intake: evidence from a case/control and a prospective study. *PLoS Med*  
19  
20 2011;8:e1001106. (DOI 10.1371, last accessed November 11, 2013)  
21  
22  
23
- 24  
25 25. International Warfarin Pharmacogenetics Consortium, Klein TE, Altman RB,  
26  
27 Eriksson N, et al. Estimation of the warfarin dose with clinical and pharmacogenetic  
28  
29 data. *N Engl J Med* 2009;360:753-764.  
30  
31  
32
- 33  
34 26. Simon T, Verstuyft C, Mary-Krause M, et al; French Registry of Acute ST-Elevation  
35  
36 and Non-ST-Elevation Myocardial Infarction (FAST-MI) Investigators. Genetic  
37  
38 determinants of response to clopidogrel and cardiovascular events. *N Engl J Med*  
39  
40 2009;360:363-375.  
41  
42  
43
- 44  
45 27. SEARCH Collaborative Group, Link E, Parish S, Armitage J, et al. SLCO1B1  
46  
47 variants and statin-induced myopathy--a genomewide study. *N Engl J Med*  
48  
49 2008;359:789-799.  
50  
51  
52
- 53  
54 28. Ginsburg GS, Shah SH, McCarthy JJ. Taking cardiovascular genetic association  
55  
56  
57  
58  
59  
60

1  
2  
3  
4  
5  
6 studies to the next level. *J Am Coll Cardiol* 2007;50:930-932.  
7  
8  
9  
10  
11  
12  
13  
14  
15  
16  
17  
18  
19  
20  
21  
22  
23  
24  
25  
26  
27  
28  
29  
30  
31  
32  
33  
34  
35  
36  
37  
38  
39  
40  
41  
42  
43  
44  
45  
46  
47  
48  
49  
50  
51  
52  
53  
54  
55  
56  
57  
58  
59  
60

For peer review only

Table 1. Patient Background Based on rs1333049 Genotype

| Parameter               | Overall<br>(n=2022) | CC<br>(n=574)       | CG<br>(n=997)       | GG<br>(n=451)       | p-value |
|-------------------------|---------------------|---------------------|---------------------|---------------------|---------|
| Age, years              | 65 (57-73)          | 65 (57-73)          | 65 (57-73)          | 65 (58-73)          | 0.986   |
| Male, %                 | 76.8                | 78.6                | 75.2                | 77.8                | 0.265   |
| BMI, kg/m <sup>2</sup>  | 23.8<br>(21.9-25.9) | 23.9<br>(21.8-25.7) | 23.7<br>(21.8-25.8) | 23.8<br>(22.0-26.0) | 0.653   |
| STEMI, %                | 87.7                | 88.1                | 86.6                | 89.6                | 0.272   |
| Coronary risk factor    |                     |                     |                     |                     |         |
| Diabetes, %             | 31.6                | 33.0                | 29.7                | 33.7                | 0.227   |
| Hypertension, %         | 60.1                | 61.0                | 59.5                | 60.3                | 0.829   |
| Dyslipidemia, %         | 46.5                | 43.8                | 47.2                | 48.5                | 0.267   |
| Smoking, %              | 64.3                | 63.6                | 64.4                | 65.2                | 0.868   |
| CAG Findings            |                     |                     |                     |                     |         |
| Target lesion           |                     |                     |                     |                     | 0.153   |
| Left main trunk, %      | 1.0                 | 1.0                 | 1.0                 | 1.1                 |         |
| LAD, %                  | 45.1                | 43.2                | 43.7                | 50.3                |         |
| Diagonal branch, %      | 2.9                 | 3.0                 | 2.7                 | 3.1                 |         |
| RCA, %                  | 35.8                | 37.3                | 35.6                | 34.4                |         |
| LCx, %                  | 14.7                | 14.8                | 16.5                | 10.6                |         |
| Graft, %                | 0.1                 | 0.3                 | 0.0                 | 0.0                 |         |
| Unkown, %               | 0.4                 | 0.3                 | 0.4                 | 0.4                 |         |
| Stenting, %             | 88.8                | 90.1                | 87.6                | 90.0                | 0.207   |
| Multivessel disease, %  | 40.2                | 38.6                | 40.1                | 42.4                | 0.473   |
| Peak CPK, IU/L          | 2269<br>(1027-4006) | 2304<br>(1005-4087) | 2242<br>(1026-4041) | 2345<br>(1104-3882) | 0.898   |
| Medication at discharge |                     |                     |                     |                     |         |
| ACEI, %                 | 44.6                | 46.2                | 44.2                | 43.5                | 0.650   |
| ARB, %                  | 40.4                | 38.2                | 41.4                | 41.0                | 0.425   |
| Beta-blocker, %         | 62.0                | 59.9                | 62.5                | 63.4                | 0.466   |
| Ca-blocker, %           | 13.5                | 13.2                | 13.2                | 14.4                | 0.814   |
| Statin, %               | 53.5                | 50.7                | 54.1                | 55.7                | 0.249   |
| Diuretics, %            | 24.7                | 22.6                | 26.0                | 24.4                | 0.333   |
| Dual anti-platelet, %   | 80.8                | 80.8                | 80.6                | 80.9                | 0.990   |

1  
2  
3  
4  
5  
6 Categorical variables are presented as percentage and continuous variables are presented  
7  
8  
9 as the median (25-75 percentiles). ACEI, angiotensin-converting enzyme inhibitor; ARB,  
10  
11 angiotensin receptor blocker; BMI, body mass index; CAG, coronary angiography; CPK,  
12  
13 creatine phosphokinase; LAD, left anterior descending artery; LCx, left circumflex  
14  
15 artery; RCA, right coronary artery; and STEMI, ST-elevation myocardial infarction.  
16  
17  
18  
19  
20  
21  
22  
23  
24  
25  
26  
27  
28  
29  
30  
31  
32  
33  
34  
35  
36  
37  
38  
39  
40  
41  
42  
43  
44  
45  
46  
47  
48  
49  
50  
51  
52  
53  
54  
55  
56  
57  
58  
59  
60

Table 2. Summary of studies examining the association between 9p21 variants and re-myocardial infarction events after acute coronary syndrome

|                    | OACIS Registry                                         | GRACE Genetic study                                    | Italian Genetic study             | TexGen Registry                   |
|--------------------|--------------------------------------------------------|--------------------------------------------------------|-----------------------------------|-----------------------------------|
| Reference          | —                                                      | 12                                                     | 13                                | 14                                |
| Year               | —                                                      | 2010                                                   | 2011                              | 2012                              |
| SNP                | rs1333049                                              | rs1333049                                              | rs1333040                         | rs1333049                         |
| Pt number          | 2,022                                                  | 2,942                                                  | 1,508                             | 2,067                             |
| Design             | Prospective                                            | Prospective                                            | Prospective                       | Prospective                       |
| Follow-up          | 1 year                                                 | 6 months                                               | 9.95 years                        | 3.2 years                         |
| Population         | Japan                                                  | UK, Belgium, Poland                                    | Italy                             | USA                               |
| Background disease | MI (STEMI 87.7%, non-STEMI 12.3%)                      | ACS (STEMI 27.2%, non-STEMI 43.3%, UA 29.5%)           | Early-onset MI                    | ACS (fraction unknown)            |
| PCI                | 100%                                                   | 47.5%                                                  | 0%                                | 63.6%                             |
| End-point          | ReMI after survival discharge                          | ReMI including in-hospital events                      | ReMI including in-hospital events | ReMI including in-hospital events |
| Conclusion         | Low event rate with homozygous carriers of risk allele | High event rate with risk allele carriers (univariate) | No association                    | No association                    |
| Replication        | None                                                   | None                                                   | None                              | None                              |

ACS, acute coronary syndrome; CAD, coronary artery disease; DES, drug-eluting stent;

MI, myocardial infarction; PCI, percutaneous coronary intervention; Pt, participants;

ReMI, recurrence of myocardial infarction; STEMI, ST-elevation myocardial infarction;

UA, unstable angina.



1  
2  
3  
4  
5  
6 Figure Legends  
7  
8  
9  
10

11  
12 Figure 1. Patient selection flow chart. AMI, acute myocardial infarction; DNA,  
13 deoxyribonucleic acid; MI, myocardial infarction; OACIS, Osaka Acute Coronary  
14 Insufficiency Study; and PCI, percutaneous coronary intervention.  
15  
16  
17  
18  
19

20  
21  
22  
23  
24  
25  
26 Figure 2. Kaplan-Meier estimates of re-myocardial infarction event.  
27  
28  
29  
30  
31  
32  
33  
34

35 Figure 3. Impact of the rs1333049 genotype on the onset and 1-year re-myocardial  
36 infarction. AMI, acute myocardial infarction; CI, confidence interval; HR, hazard ratio  
37 (CC vs CG/GG); OR, odds ratio (C vs G per allele); and ReMI, re-myocardial  
38  
39  
40  
41  
42  
43  
44  
45  
46  
47  
48  
49  
50  
51  
52  
53  
54  
55  
56  
57  
58  
59  
60

59  
60 Figure 4. Subgroup analysis of the impact of rs1333049 genotype on 1-year  
re-myocardial infarction rate. ACEI, angiotensin-converting enzyme inhibitor; ARB,

1  
2  
3  
4  
5  
6 angiotensin receptor blocker; CI, confidence interval; DAPT, dual anti-platelet therapy;  
7  
8  
9 HR, hazard ratio; NA, not assessed due to insufficient number of events in the subgroup  
10  
11  
12 analysis; and STEMI, ST-elevation myocardial infarction.  
13  
14  
15  
16  
17  
18  
19

20  
21 Supplementary Figure 1. Linkage disequilibrium of chromosome 9p21 single nucleotide  
22  
23 polymorphisms in the present study population  
24  
25  
26  
27  
28

29 Linkage disequilibrium was evaluated by D prime (left) and R squared (right) using  
30  
31  
32 PLINK and Haploview softwares.  
33  
34  
35  
36  
37  
38  
39  
40  
41  
42  
43  
44  
45  
46  
47  
48  
49  
50  
51  
52  
53  
54  
55  
56  
57  
58  
59  
60

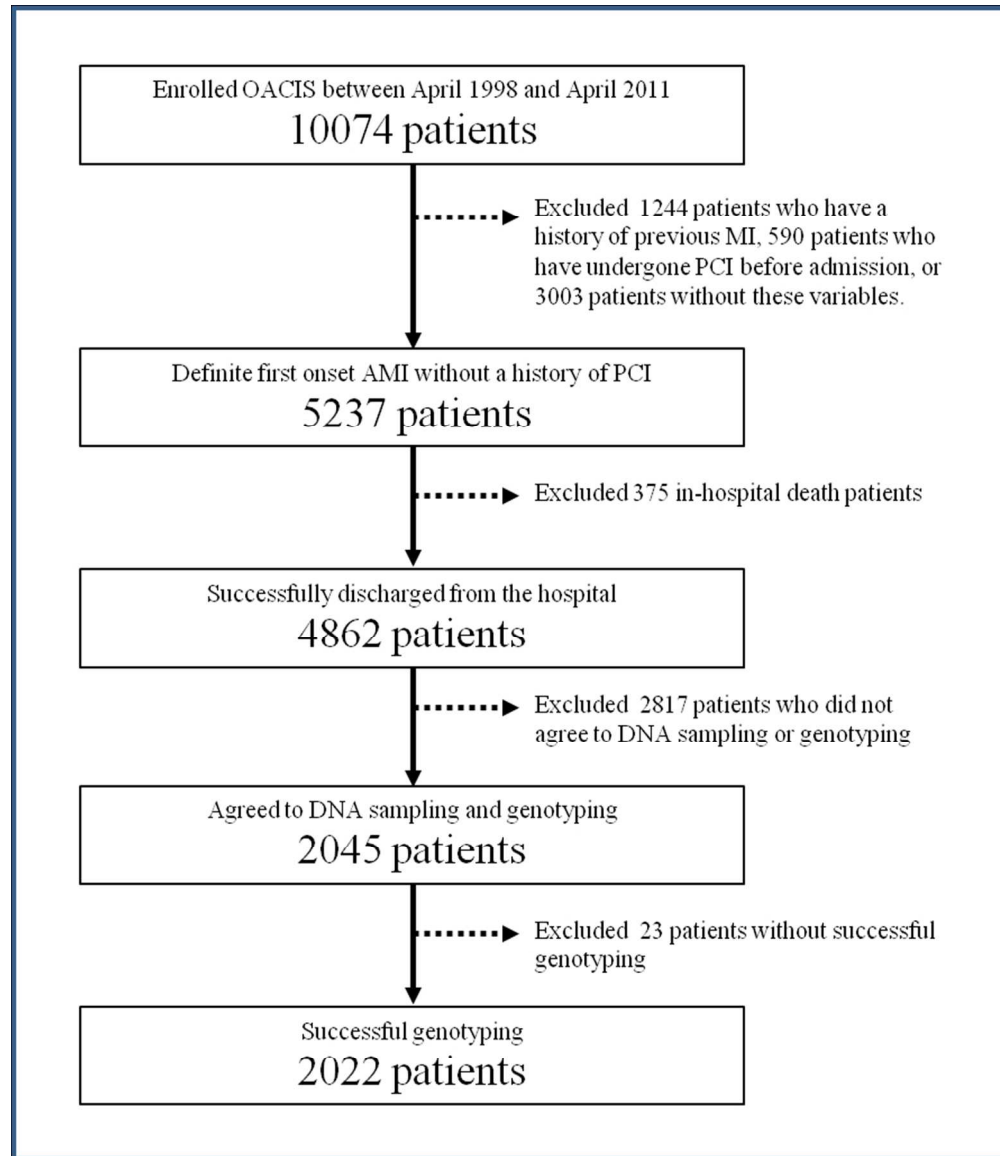

Patient selection flow chart. AMI, acute myocardial infarction; DNA, deoxyribonucleic acid; MI, myocardial infarction; OACIS, Osaka Acute Coronary Insufficiency Study; and PCI, percutaneous coronary intervention.  
151x174mm (150 x 150 DPI)

1  
2  
3  
4  
5  
6  
7  
8  
9  
10  
11  
12  
13  
14  
15  
16  
17  
18  
19  
20  
21  
22  
23  
24  
25  
26  
27  
28  
29  
30  
31  
32  
33  
34  
35  
36  
37  
38  
39  
40  
41  
42  
43  
44  
45  
46  
47  
48  
49  
50  
51  
52  
53  
54  
55  
56  
57  
58  
59  
60

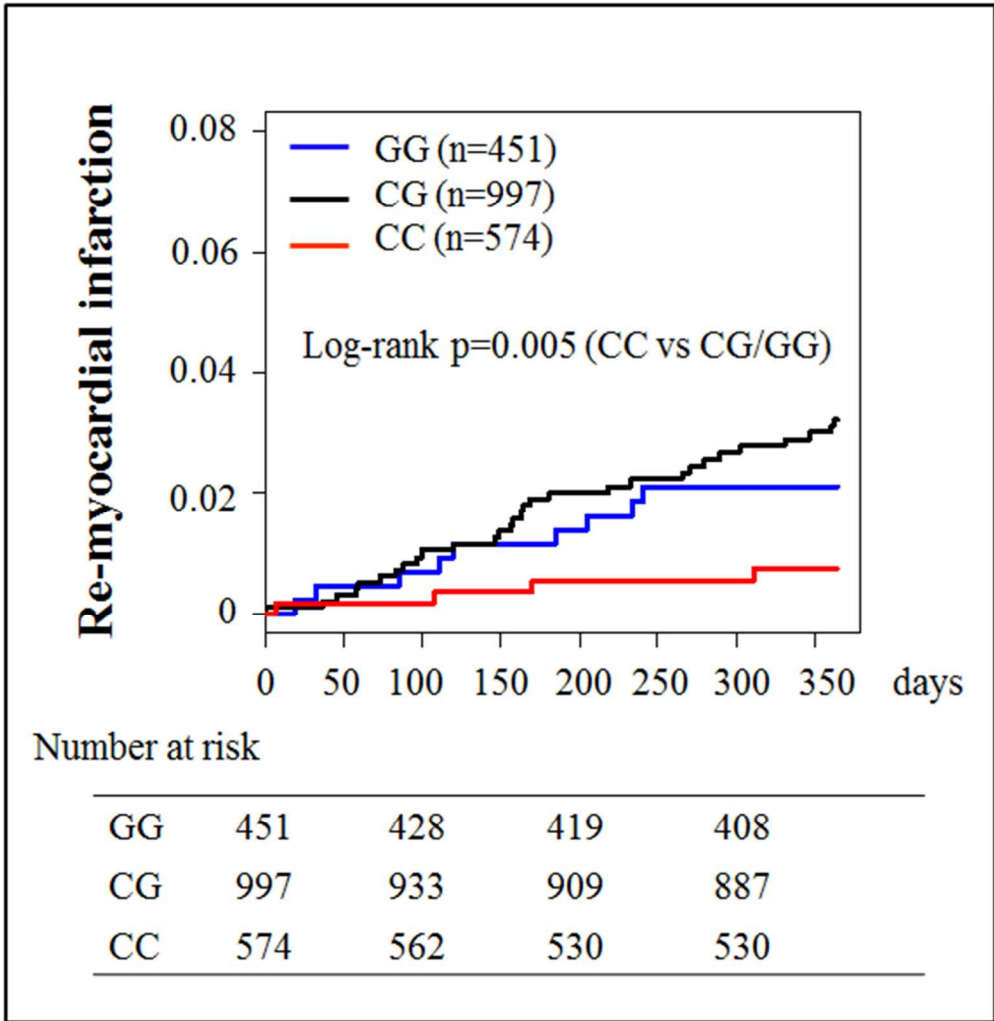

Kaplan-Meier estimates of re-myocardial infarction event.  
152x156mm (96 x 96 DPI)

1  
2  
3  
4  
5  
6  
7  
8  
9  
10  
11  
12  
13  
14  
15  
16  
17  
18  
19  
20  
21  
22  
23  
24  
25  
26  
27  
28  
29  
30  
31  
32  
33  
34  
35  
36  
37  
38  
39  
40  
41  
42  
43  
44  
45  
46  
47  
48  
49  
50  
51  
52  
53  
54  
55  
56  
57  
58  
59  
60

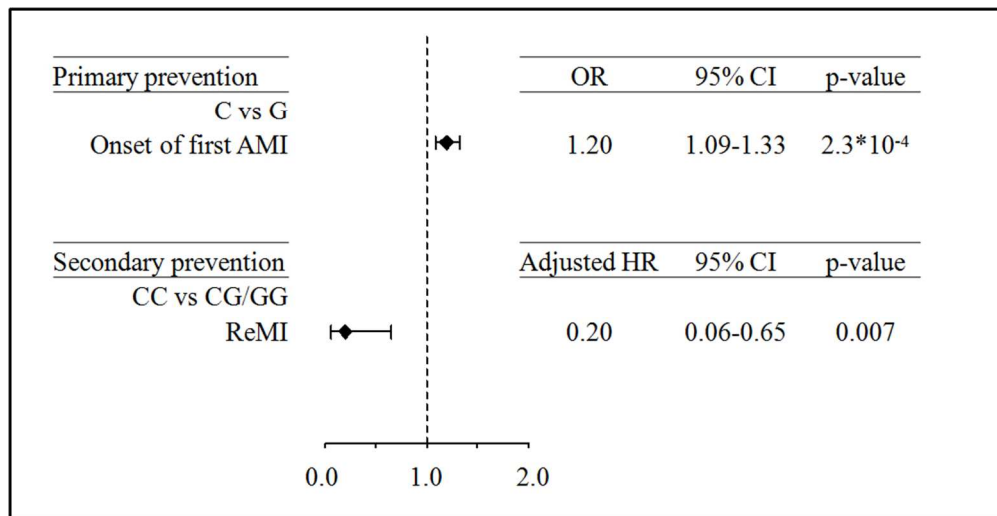

Impact of the rs1333049 genotype on the onset and 1-year re-myocardial infarction. AMI, acute myocardial infarction; CI, confidence interval; HR, hazard ratio (CC vs CG/GG); OR, odds ratio (C vs G per allele); and ReMI, re-myocardial infarction.  
277x143mm (96 x 96 DPI)

review only

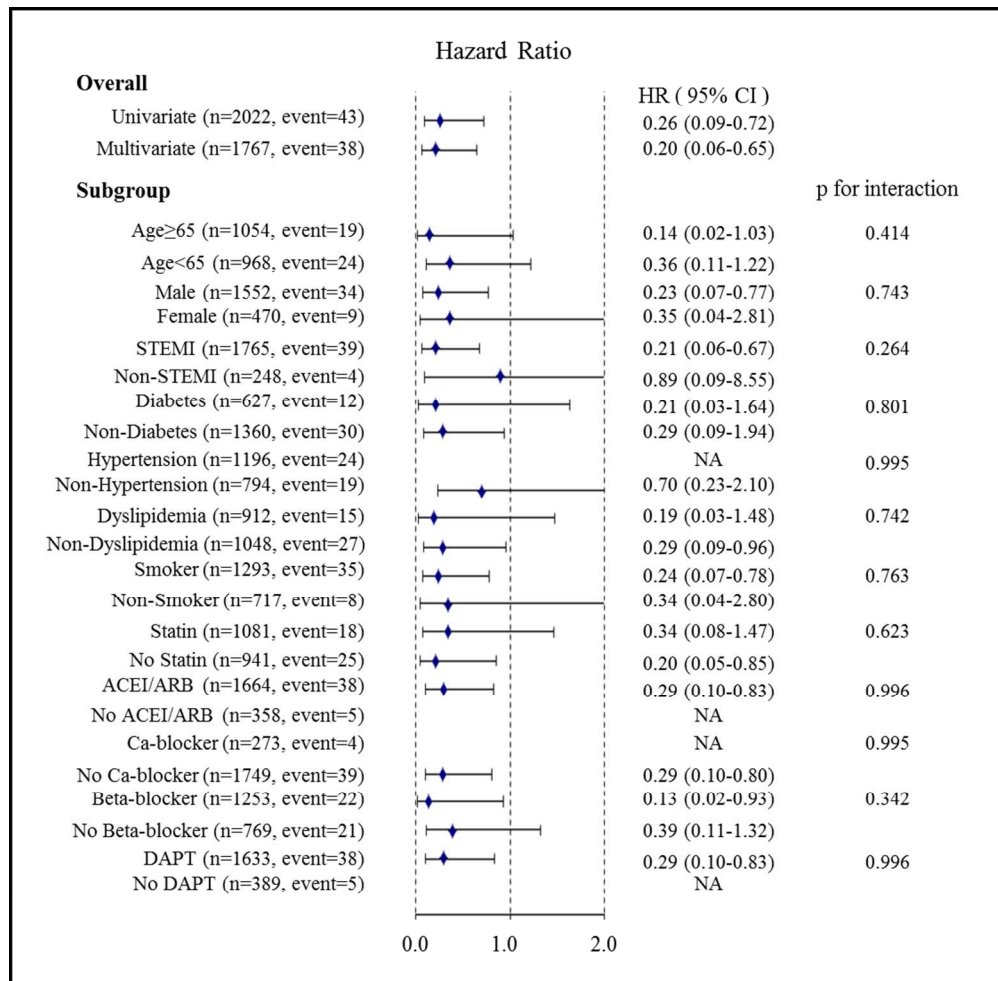

Subgroup analysis of the impact of rs1333049 genotype on 1-year re-myocardial infarction rate. ACEI, angiotensin-converting enzyme inhibitor; ARB, angiotensin receptor blocker; CI, confidence interval; DAPT, dual anti-platelet therapy; HR, hazard ratio; NA, not assessed due to insufficient number of events in the subgroup analysis; and STEMI, ST-elevation myocardial infarction.

190x186mm (150 x 150 DPI)

1  
2  
3  
4  
5  
6  
7  
8  
9  
10  
11  
12  
13  
14  
15  
16  
17  
18  
19  
20  
21  
22  
23  
24  
25  
26  
27  
28  
29  
30  
31  
32  
33  
34  
35  
36  
37  
38  
39  
40  
41  
42  
43  
44  
45  
46  
47  
48  
49  
50  
51  
52  
53  
54  
55  
56  
57  
58  
59  
60

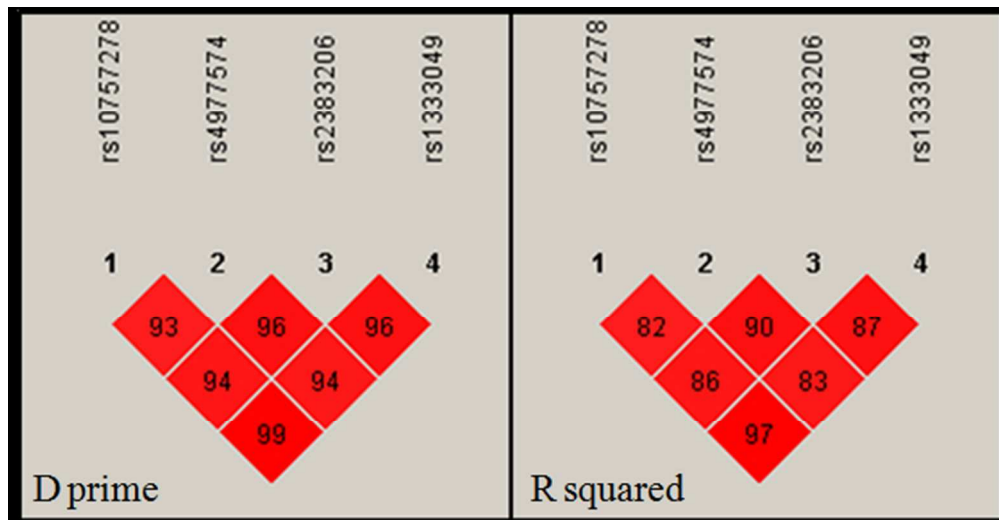

Linkage disequilibrium of chromosome 9p21 single nucleotide polymorphisms in the present study population. Linkage disequilibrium was evaluated by D prime (left) and R squared (right) using PLINK and Haploview softwares.

235x121mm (67 x 67 DPI)

review only

## STROBE Statement—checklist of items that should be included in reports of observational studies

|                              | Item No | Recommendation                                                                                                                                                                                                                                                                                                                                                                                                                                                                                                                                                                                                                                                                                   |
|------------------------------|---------|--------------------------------------------------------------------------------------------------------------------------------------------------------------------------------------------------------------------------------------------------------------------------------------------------------------------------------------------------------------------------------------------------------------------------------------------------------------------------------------------------------------------------------------------------------------------------------------------------------------------------------------------------------------------------------------------------|
| <b>Title and abstract</b>    | 1       | (a) Indicate the study's design with a commonly used term in the title or the abstract<br>(b) Provide in the abstract an informative and balanced summary of what was done and what was found                                                                                                                                                                                                                                                                                                                                                                                                                                                                                                    |
| <b>Introduction</b>          |         |                                                                                                                                                                                                                                                                                                                                                                                                                                                                                                                                                                                                                                                                                                  |
| Background/rationale         | 2       | Explain the scientific background and rationale for the investigation being reported                                                                                                                                                                                                                                                                                                                                                                                                                                                                                                                                                                                                             |
| Objectives                   | 3       | State specific objectives, including any prespecified hypotheses                                                                                                                                                                                                                                                                                                                                                                                                                                                                                                                                                                                                                                 |
| <b>Methods</b>               |         |                                                                                                                                                                                                                                                                                                                                                                                                                                                                                                                                                                                                                                                                                                  |
| Study design                 | 4       | Present key elements of study design early in the paper                                                                                                                                                                                                                                                                                                                                                                                                                                                                                                                                                                                                                                          |
| Setting                      | 5       | Describe the setting, locations, and relevant dates, including periods of recruitment, exposure, follow-up, and data collection                                                                                                                                                                                                                                                                                                                                                                                                                                                                                                                                                                  |
| Participants                 | 6       | (a) <i>Cohort study</i> —Give the eligibility criteria, and the sources and methods of selection of participants. Describe methods of follow-up<br><i>Case-control study</i> —Give the eligibility criteria, and the sources and methods of case ascertainment and control selection. Give the rationale for the choice of cases and controls<br><i>Cross-sectional study</i> —Give the eligibility criteria, and the sources and methods of selection of participants<br>(b) <i>Cohort study</i> —For matched studies, give matching criteria and number of exposed and unexposed<br><i>Case-control study</i> —For matched studies, give matching criteria and the number of controls per case |
| Variables                    | 7       | Clearly define all outcomes, exposures, predictors, potential confounders, and effect modifiers. Give diagnostic criteria, if applicable                                                                                                                                                                                                                                                                                                                                                                                                                                                                                                                                                         |
| Data sources/<br>measurement | 8*      | For each variable of interest, give sources of data and details of methods of assessment (measurement). Describe comparability of assessment methods if there is more than one group                                                                                                                                                                                                                                                                                                                                                                                                                                                                                                             |
| Bias                         | 9       | Describe any efforts to address potential sources of bias                                                                                                                                                                                                                                                                                                                                                                                                                                                                                                                                                                                                                                        |
| Study size                   | 10      | Explain how the study size was arrived at                                                                                                                                                                                                                                                                                                                                                                                                                                                                                                                                                                                                                                                        |
| Quantitative variables       | 11      | Explain how quantitative variables were handled in the analyses. If applicable, describe which groupings were chosen and why                                                                                                                                                                                                                                                                                                                                                                                                                                                                                                                                                                     |
| Statistical methods          | 12      | (a) Describe all statistical methods, including those used to control for confounding<br>(b) Describe any methods used to examine subgroups and interactions<br>(c) Explain how missing data were addressed<br>(d) <i>Cohort study</i> —If applicable, explain how loss to follow-up was addressed<br><i>Case-control study</i> —If applicable, explain how matching of cases and controls was addressed<br><i>Cross-sectional study</i> —If applicable, describe analytical methods taking account of sampling strategy<br>(e) Describe any sensitivity analyses                                                                                                                                |

Continued on next page



**Results**

|                  |     |                                                                                                                                                                                                                                                                                                                                                                                                               |
|------------------|-----|---------------------------------------------------------------------------------------------------------------------------------------------------------------------------------------------------------------------------------------------------------------------------------------------------------------------------------------------------------------------------------------------------------------|
| Participants     | 13* | (a) Report numbers of individuals at each stage of study—eg numbers potentially eligible, examined for eligibility, confirmed eligible, included in the study, completing follow-up, and analysed<br>(b) Give reasons for non-participation at each stage<br>(c) Consider use of a flow diagram                                                                                                               |
| Descriptive data | 14* | (a) Give characteristics of study participants (eg demographic, clinical, social) and information on exposures and potential confounders<br>(b) Indicate number of participants with missing data for each variable of interest<br>(c) <i>Cohort study</i> —Summarise follow-up time (eg, average and total amount)                                                                                           |
| Outcome data     | 15* | <i>Cohort study</i> —Report numbers of outcome events or summary measures over time<br><i>Case-control study</i> —Report numbers in each exposure category, or summary measures of exposure<br><i>Cross-sectional study</i> —Report numbers of outcome events or summary measures                                                                                                                             |
| Main results     | 16  | (a) Give unadjusted estimates and, if applicable, confounder-adjusted estimates and their precision (eg, 95% confidence interval). Make clear which confounders were adjusted for and why they were included<br>(b) Report category boundaries when continuous variables were categorized<br>(c) If relevant, consider translating estimates of relative risk into absolute risk for a meaningful time period |
| Other analyses   | 17  | Report other analyses done—eg analyses of subgroups and interactions, and sensitivity analyses                                                                                                                                                                                                                                                                                                                |

**Discussion**

|                  |    |                                                                                                                                                                            |
|------------------|----|----------------------------------------------------------------------------------------------------------------------------------------------------------------------------|
| Key results      | 18 | Summarise key results with reference to study objectives                                                                                                                   |
| Limitations      | 19 | Discuss limitations of the study, taking into account sources of potential bias or imprecision. Discuss both direction and magnitude of any potential bias                 |
| Interpretation   | 20 | Give a cautious overall interpretation of results considering objectives, limitations, multiplicity of analyses, results from similar studies, and other relevant evidence |
| Generalisability | 21 | Discuss the generalisability (external validity) of the study results                                                                                                      |

**Other information**

|         |    |                                                                                                                                                               |
|---------|----|---------------------------------------------------------------------------------------------------------------------------------------------------------------|
| Funding | 22 | Give the source of funding and the role of the funders for the present study and, if applicable, for the original study on which the present article is based |
|---------|----|---------------------------------------------------------------------------------------------------------------------------------------------------------------|

\*Give information separately for cases and controls in case-control studies and, if applicable, for exposed and unexposed groups in cohort and cross-sectional studies.

**Note:** An Explanation and Elaboration article discusses each checklist item and gives methodological background and published examples of transparent reporting. The STROBE checklist is best used in conjunction with this article (freely available on the Web sites of PLoS Medicine at <http://www.plosmedicine.org/>, Annals of Internal Medicine at <http://www.annals.org/>, and Epidemiology at <http://www.epidem.com/>). Information on the STROBE Initiative is available at [www.strobe-statement.org](http://www.strobe-statement.org).

# BMJ Open

## Reduced risk of recurrent myocardial infarction in homozygous carriers of the chromosome 9p21 rs1333049 C risk allele in the contemporary percutaneous coronary intervention era: a prospective observational study



|                                 |                                                                                                                                                                                                                                                                                                                                                                                                                                                                                                                                                                                                                                                                                                                                                                                                                                                                                                                                                                                                                                                                                                                                                                                                                                                                                                                                                                                                                                                                                                                                                                          |
|---------------------------------|--------------------------------------------------------------------------------------------------------------------------------------------------------------------------------------------------------------------------------------------------------------------------------------------------------------------------------------------------------------------------------------------------------------------------------------------------------------------------------------------------------------------------------------------------------------------------------------------------------------------------------------------------------------------------------------------------------------------------------------------------------------------------------------------------------------------------------------------------------------------------------------------------------------------------------------------------------------------------------------------------------------------------------------------------------------------------------------------------------------------------------------------------------------------------------------------------------------------------------------------------------------------------------------------------------------------------------------------------------------------------------------------------------------------------------------------------------------------------------------------------------------------------------------------------------------------------|
| Journal:                        | <i>BMJ Open</i>                                                                                                                                                                                                                                                                                                                                                                                                                                                                                                                                                                                                                                                                                                                                                                                                                                                                                                                                                                                                                                                                                                                                                                                                                                                                                                                                                                                                                                                                                                                                                          |
| Manuscript ID:                  | bmjopen-2014-005438.R1                                                                                                                                                                                                                                                                                                                                                                                                                                                                                                                                                                                                                                                                                                                                                                                                                                                                                                                                                                                                                                                                                                                                                                                                                                                                                                                                                                                                                                                                                                                                                   |
| Article Type:                   | Research                                                                                                                                                                                                                                                                                                                                                                                                                                                                                                                                                                                                                                                                                                                                                                                                                                                                                                                                                                                                                                                                                                                                                                                                                                                                                                                                                                                                                                                                                                                                                                 |
| Date Submitted by the Author:   | 16-Jul-2014                                                                                                                                                                                                                                                                                                                                                                                                                                                                                                                                                                                                                                                                                                                                                                                                                                                                                                                                                                                                                                                                                                                                                                                                                                                                                                                                                                                                                                                                                                                                                              |
| Complete List of Authors:       | Hara, Masahiko; Osaka University Graduate School of Medicine, Department of Cardiovascular Medicine<br>Sakata, Yasuhiko; Tohoku University Graduate School of Medicine, Department of Cardiovascular Medicine<br>Nakatani, Daisaku; Osaka University Graduate School of Medicine, Department of Cardiovascular Medicine<br>Suna, Shinichiro; Osaka University Graduate School of Medicine, Department of Cardiovascular Medicine<br>Usami, Masaya; Osaka University Graduate School of Medicine, Department of Cardiovascular Medicine<br>Matsumoto, Sen; Osaka University Graduate School of Medicine, Department of Cardiovascular Medicine<br>Ozaki, Kouichi; RIKEN Center for Integrative Medical Sciences, Laboratory for Cardiovascular Diseases<br>Nishino, Masami; Osaka Rosai Hospital, Cardiology<br>Sato, Hiroshi; Kwansai Gakuin University, School of Human Welfare Studies Health Care Center and Clinic<br>Kitamura, Tetsuhisa; Osaka University Graduate School of Medicine, Department of Social and Environmental Medicine<br>Nanto, Shinsuke; Osaka University Graduate School of Medicine, Department of Advanced Cardiovascular Therapeutics<br>Hamasaki, Toshimitsu; Osaka University Graduate School of Medicine, Department of Biomedical Statistics<br>Tanaka, Toshihiro; RIKEN Center for Integrative Medical Sciences, Laboratory for Cardiovascular Diseases<br>Hori, Ma; Osaka Medical Center for Cancer and Cardiovascular Diseases, Komuro, Issei; University of Tokyo Graduate School of Medicine, Department of Cardiovascular Medicine |
| <b>Primary Subject Heading</b>: | Cardiovascular medicine                                                                                                                                                                                                                                                                                                                                                                                                                                                                                                                                                                                                                                                                                                                                                                                                                                                                                                                                                                                                                                                                                                                                                                                                                                                                                                                                                                                                                                                                                                                                                  |
| Secondary Subject Heading:      | Genetics and genomics                                                                                                                                                                                                                                                                                                                                                                                                                                                                                                                                                                                                                                                                                                                                                                                                                                                                                                                                                                                                                                                                                                                                                                                                                                                                                                                                                                                                                                                                                                                                                    |
| Keywords:                       | Acute myocardial infarction, Secondary prevention, Single nucleotide polymorphism, 9p21                                                                                                                                                                                                                                                                                                                                                                                                                                                                                                                                                                                                                                                                                                                                                                                                                                                                                                                                                                                                                                                                                                                                                                                                                                                                                                                                                                                                                                                                                  |
|                                 |                                                                                                                                                                                                                                                                                                                                                                                                                                                                                                                                                                                                                                                                                                                                                                                                                                                                                                                                                                                                                                                                                                                                                                                                                                                                                                                                                                                                                                                                                                                                                                          |

1  
2  
3  
4  
5  
6  
7  
8  
9  
10  
11  
12  
13  
14  
15  
16  
17  
18  
19  
20  
21  
22  
23  
24  
25  
26  
27  
28  
29  
30  
31  
32  
33  
34  
35  
36  
37  
38  
39  
40  
41  
42  
43  
44  
45  
46  
47  
48  
49  
50  
51  
52  
53  
54  
55  
56  
57  
58  
59  
60

SCHOLARONE™  
Manuscripts

For peer review only

## Original Research Article

***Reduced risk of recurrent myocardial infarction in homozygous carriers  
of the chromosome 9p21 rs1333049 C risk allele in the contemporary  
percutaneous coronary intervention era: a prospective observational  
study***

Masahiko Hara, MD <sup>1)</sup>, Yasuhiko Sakata, MD, PhD <sup>1)2)3)</sup>, Daisaku Nakatani,  
MD, PhD <sup>1)</sup>, Shinichiro Suna, MD, PhD <sup>1)</sup>, Masaya Usami, MD, PhD <sup>1)</sup>, Sen  
Matsumoto, MD, PhD <sup>1)</sup>, Kouichi Ozaki, PhD <sup>4)</sup>, Masami Nishino, MD, PhD <sup>5)</sup>,  
Hiroshi Sato, MD, PhD <sup>6)</sup>, Tetsuhisa Kitamura, MD, MSc, DrPH <sup>7)</sup>, Shinsuke  
Nanto, MD, PhD <sup>1)2)</sup>, Toshimitsu Hamasaki, PhD <sup>8)</sup>, Toshihiro Tanaka, MD,  
PhD <sup>4)9)</sup>, Masatsugu Hori, MD, PhD <sup>10)</sup>, Issei Komuro, MD, PhD <sup>11)</sup>, on behalf of  
the OACIS Investigators

1) Department of Cardiovascular Medicine, Osaka University Graduate School of  
Medicine, Suita, Japan

2) Department of Advanced Cardiovascular Therapeutics, Osaka University Graduate

1  
2  
3  
4  
5  
6 School of Medicine, Suita, Japan  
7

8  
9 3) Department of Cardiovascular Medicine, Tohoku University Graduate School of  
10  
11  
12 Medicine, Sendai, Japan  
13

14  
15 4) Laboratory for Cardiovascular Diseases, RIKEN Center for Integrative Medical  
16  
17  
18 Sciences, Yokohama, Japan.  
19

20  
21 5) Division of Cardiology, Osaka Rosai Hospital, Sakai, Japan  
22

23  
24 6) School of Human Welfare Studies, Kwansai Gakuin University, Nishinomiya, Japan  
25

26  
27 7) Division of Environmental Medicine and Population Sciences, Department of Social  
28  
29  
30 and Environmental Medicine, Osaka University Graduate School of Medicine, Suita,  
31  
32 Japan  
33

34  
35 8) Department of Biomedical Statistics, Osaka University Graduate School of Medicine,  
36  
37  
38 Suita, Japan  
39

40  
41 9) Department of Human Genetics and Disease Diversity, Tokyo Medical and Dental  
42  
43  
44 University Graduate School of Medical and Dental Sciences, Tokyo, Japan  
45

46  
47 10) Osaka Prefectural Hospital Organization Osaka Medical Center for Cancer and  
48  
49  
50 Cardiovascular Diseases, Osaka, Japan  
51

52  
53 11) Department of Cardiovascular Medicine, The University of Tokyo Graduate School  
54  
55  
56 of Medicine, Tokyo, Japan  
57  
58  
59  
60

1  
2  
3  
4  
5  
6  
7  
8  
9 **Key Words:** 9p21, Acute myocardial infarction, Secondary prevention, and Single  
10  
11 nucleotide polymorphism.  
12  
13

14  
15  
16  
17  
18 Running Title: 9p21 SNP and ReMI  
19

20  
21  
22  
23 Total word count of the text: 2820 words  
24  
25  
26  
27

28  
29 **Address for correspondence:**  
30

31  
32 Yasuhiko Sakata, MD, PhD  
33

34  
35 Department of Cardiovascular Medicine  
36

37  
38 Tohoku University Graduate School of Medicine, 1-1 Seiryomachi, Aoba-ku, Sendai  
39

40  
41 980-8574, Japan.  
42

43  
44 Phone: (81)-22-717-7152  
45

46  
47 Fax: (81)-22-717-7156  
48

49  
50 E-mail: sakatayk@cardiology.med.osaka-u.ac.jp, sakatayk@cardio.med.tohoku.ac.jp  
51  
52  
53  
54  
55  
56  
57  
58  
59  
60

**Abstract**

**Objectives:** It is controversial whether chromosome 9p21 single nucleotide polymorphism (SNP), susceptibility variants for acute myocardial infarction (AMI) in the primary prevention setting, is associated with recurrent myocardial infarction (ReMI) in the secondary prevention setting. The purpose of this study is to evaluate the impact of chromosome 9p21 SNP on ReMI in patients receiving secondary prevention programs after AMI.

**Design:** A prospective observational study.

**Setting:** Osaka Acute Coronary Insufficiency Study (OACIS) in Japan.

**Participants:** 2,022 patients from OACIS database.

**Interventions:** Genotyping of the 9p21 rs1333049 variant.

**Primary outcome measures:** ReMI event after survival discharge for 1 year.

**Results:** A total of 43 ReMI occurred during the 1-year follow-up period. Although the rs1333049 C allele had an increased susceptibility to their first AMI in an additive model when compared with 1373 healthy controls (odds ratio 1.20, 95% confidence interval 1.09-1.33,  $p=2.3 \times 10^{-4}$ ), patients with the CC genotype had a lower incidence of ReMI at 1-year after discharge of AMI (log-rank  $p=0.005$ ). The adjusted hazard ratios of the CC genotype as compared with CG/GG genotypes was 0.20 (0.06-0.65,  $p=0.007$ ).

1  
2  
3  
4  
5  
6 Subgroup analysis demonstrated that the association between the rs1333049 CC  
7  
8 genotype and lower incidence of 1-year ReMI was common to all subgroups.  
9  
10

11 **Conclusions:** Homozygous carriers of the rs1333049 C allele on chromosome 9p21  
12  
13 showed a reduced risk of 1-year ReMI in the contemporary percutaneous coronary  
14  
15 intervention era, although the C allele had conferred susceptibility to their first AMI.  
16  
17  
18  
19  
20  
21  
22  
23  
24  
25  
26  
27  
28  
29  
30  
31  
32  
33  
34  
35  
36  
37  
38  
39  
40  
41  
42  
43  
44  
45  
46  
47  
48  
49  
50  
51  
52  
53  
54  
55  
56  
57  
58  
59  
60



**Strengths and limitations of this study**

- This is the first study to clearly show a change of the susceptibility risk of the 9p21 variant to acute myocardial infarction between the primary and secondary prevention settings in percutaneous coronary intervention era.
- Data regarding the mechanism and culprit lesion of re-myocardial infarction were not available.
- Replication studies with a larger sample are warranted to confirm our observations.

## INTRODUCTION

Acute myocardial infarction (AMI) is one of the leading causes of death and disability worldwide.<sup>1</sup> AMI is associated with a positive family history as well as several traditional coronary risk factors including diabetes, hypertension, dyslipidemia, and smoking, suggesting that the pathogenesis of AMI has a substantial genetic component.<sup>2</sup> Genome-wide association studies (GWAS) have identified several genetic loci that confer susceptibility to AMI and coronary artery disease (CAD) in the primary prevention setting.<sup>3-7</sup> Among these genetic variants, single nucleotide polymorphisms (SNPs) on chromosome 9p21 are the most common and significant susceptibility risk factors for AMI and CAD, regardless of race.<sup>3-11</sup> However, it remains controversial whether chromosome 9p21 SNPs are associated with recurrent myocardial infarction (ReMI) in post-AMI patients receiving the evidence-based secondary prevention programs.<sup>12-14</sup>

For example, the Italian Genetic study and TexGen registry revealed that 9p21 genetic variation was not associated with ReMI events after early-onset myocardial infarction and acute coronary syndrome (ACS), respectively,<sup>13-14</sup> while the GRACE genetic study showed that risk allele carriers of 9p21 SNPs had a higher incidence of ReMI after ACS.<sup>12</sup> One possible explanation for this discrepancy among these three

1  
2  
3  
4  
5  
6 studies is an involvement of in-hospital ReMI as an endpoint. It is reported that 9p21  
7  
8  
9 SNPs increase the risk of AMI onset by promoting the development and progression of  
10  
11  
12 coronary plaque deposition, rather than increasing susceptibility to plaque rupture.<sup>9-14</sup>  
13  
14  
15 Thus, inclusion of acute phase ReMI might have made the interpretation difficult in  
16  
17  
18 these 9p21 variant studies, as most of ReMI occurring during the acute phase of AMI  
19  
20  
21 were likely caused by 9p21-independent mechanisms, such as re-occlusion of the culprit  
22  
23  
24 lesion and/or thrombosis. Therefore, to simply assess the susceptibility impact of 9p21  
25  
26  
27 to ReMI in the secondary prevention settings, it may be better to include post-AMI  
28  
29  
30 patients only who survived the acute stage and received the state of the art secondary  
31  
32  
33 prevention program after discharge.

34  
35 The aim of the present study was to investigate the susceptibility impact of 9p21  
36  
37  
38 genetic variation on ReMI in consecutive 2,022 patients with a first AMI who were  
39  
40  
41 registered in the Osaka Acute Coronary Insufficiency Study (OACIS),<sup>15-19</sup> treated with  
42  
43  
44 emergent percutaneous coronary intervention (PCI), and discharged alive.

## 45 46 47 48 49 **METHODS**

### 50 51 52 **The OACIS**

53  
54  
55 The OACIS is a multicenter, prospective, observational registry for AMI in Japan that  
56  
57  
58  
59  
60

1  
2  
3  
4  
5  
6 was initiated in April 1998 among 25 collaborating hospitals. The OACIS is designed to  
7  
8  
9 assess patient demographics including genomic information, therapeutic procedures,  
10  
11 and subsequent clinical events in AMI patients. All study candidates were informed  
12  
13 about data collection, blood sampling, and genotyping, and provided written informed  
14  
15 consent. Research cardiologists and trained research nurses recorded data using a  
16  
17 specific reporting form. The diagnosis of AMI was based on the World Health  
18  
19 Organization criteria,<sup>20</sup> which required 2 of the following 3 criteria to be met: (1)  
20  
21 clinical history of central chest pressure, pain, or tightness lasting  $\geq 30$  min; (2) ST  
22  
23 segment elevation  $>0.1$  mV in at least one standard or 2 precordial leads; and (3) a rise  
24  
25 in serum creatinine phosphokinase concentration to more than twice the normal  
26  
27 laboratory value. The OACIS is registered to the University Hospital Medical  
28  
29 Information Network Clinical Trials Registry (UMIN-CTR) in Japan (ID:  
30  
31 UMIN000004575). Other details of OACIS are described elsewhere.<sup>15-19</sup>  
32  
33  
34  
35  
36  
37  
38  
39  
40  
41  
42  
43  
44  
45  
46

### 47 **Study design**

48  
49 Among 10,074 consecutive AMI patients registered in the OACIS between April 1998  
50  
51 and April 2011, 2,045 patients who had a first AMI, underwent emergent PCI, survived  
52  
53 to discharge, and gave a written informed consent to the study were enrolled in the  
54  
55  
56  
57  
58  
59  
60

1  
2  
3  
4  
5  
6 present study. Exclusion criteria included a history of previous myocardial infarction or  
7  
8  
9 PCI, in-hospital death cases, and lack of written informed consent for genetic study and  
10  
11  
12 deoxyribonucleic acid (DNA) sampling. Genomic DNA was extracted from peripheral  
13  
14  
15 blood samples using a commercially available kit (QIAamp DNA Blood Midi Kit;  
16  
17  
18 Qiagen, Hilden, Germany). Patients were genotyped for the rs1333049 SNP of  
19  
20  
21 chromosome 9p21 using the multiplex-polymerase chain reaction-based invader assay  
22  
23  
24 as previously described.<sup>21</sup> The reason why we focused on the rs1333049 was that it is  
25  
26  
27 the most widely studied 9p21 genetic variants in both the primary and secondary  
28  
29  
30 prevention settings.<sup>8,10-12,14</sup> We also confirmed that rs1333049 is in linkage  
31  
32  
33 disequilibrium with other major 9p21 SNPs in the OACIS registry (Supplementary  
34  
35  
36 Figure 1). Finally, the genotyping success rate for rs1333049 was 98.9% and 2,022  
37  
38  
39 patients were successfully genotyped and analyzed for the susceptibility to ReMI within  
40  
41  
42 a year after survival discharge (Figure 1). To validate the association of the rs1333049  
43  
44  
45 SNP with the first AMI, we performed a case-control association study between the  
46  
47  
48 present study population and healthy Japanese controls. Control blood samples of  
49  
50  
51 healthy Japanese adults (n=1,373, mean age, 38.6 years old, 59% male) were obtained  
52  
53  
54 from the Health Science Research Resources Bank (Osaka, Japan). The patient  
55  
56  
57 backgrounds and primary preventive medications were not adjusted in this case-control  
58  
59  
60

1  
2  
3  
4  
5  
6 association study in the primary prevention setting, since these data were not available  
7  
8  
9 in commercially obtained healthy controls and medications before first AMI were not  
10  
11  
12 available in our study population in detail.  
13

### 14 15 16 17 18 **Statistical analysis** 19

20  
21 Categorical variables were compared by the chi-square test, and continuous variables  
22  
23 were compared by the Kruskal-Wallis test. The impact of the rs1333049 genotype on  
24  
25 the onset of AMI was assessed in both the primary and secondary prevention settings.  
26  
27 The impact of rs1333049 on the onset of AMI was calculated as odds ratios (OR) and  
28  
29 95% confidence intervals (CI) in an additive model (OR per C allele increase). In the  
30  
31 secondary prevention analysis, the Kaplan-Meier method was used to estimate event  
32  
33 rates. Because the Kaplan-Meier analysis revealed that the incidence of ReMI differed  
34  
35 between the CC and CG/GG genotypes of rs1333049 (Figure 2), the differences  
36  
37 between CC and CG/GG genotypes were assessed by the log-rank tests. In addition, a  
38  
39 Cox regression model was used to compare the 1-year prognostic impacts between the  
40  
41 rs1333049 CC and CG/GG genotypes based on the estimate hazard ratios (HR) and  
42  
43 95% CI. Multivariate Cox regression analysis was performed to reduce the confounding  
44  
45 effects of variations in patient backgrounds using age, gender, body mass index,  
46  
47  
48  
49  
50  
51  
52  
53  
54  
55  
56  
57  
58  
59  
60

1  
2  
3  
4  
5  
6 ST-elevation myocardial infarction, diabetes, hypertension, dyslipidemia, smoking,  
7  
8  
9 target lesion, multivessel disease, peak creatinine phosphokinase, and prescription of  
10  
11  
12 angiotensin-converting enzyme inhibitor, angiotensin receptor blocker, beta-blockers,  
13  
14  
15 calcium channel blockers, statins, diuretics, and dual anti-platelet agents as covariates.  
16  
17  
18 Hence, the final multivariate model included all the above mentioned covariates  
19  
20  
21 regardless of the univariate results shown in Supplementary Table 1 because we  
22  
23  
24 assumed that even non-significant differences in these covariates could be confounders  
25  
26  
27 and should be adjusted. The gene-drug interactions were evaluated using p for  
28  
29  
30 interaction between genotype and each drug tested. Statistical significance was set as  
31  
32  
33  $p < 0.05$  for comparison of patient background or gene-drug interaction. Bonferroni  
34  
35  
36 correction for multiple testing was employed during the secondary prevention analysis  
37  
38  
39 and statistical significance was set as  $p < 0.025$  (0.05 divided by the number of  
40  
41  
42 independent testing; log-rank test and multiple Cox regression analysis). All statistical  
43  
44  
45 analyses were performed using SAS version 9.3 (SAS Institute Inc., Cary, NC) or R  
46  
47  
48 software packages version 2.15.1 (R Development Core Team).

## 51 52 **RESULTS**

53  
54  
55 Patient characteristics and medications at discharge are shown in Table 1. Median age  
56  
57  
58  
59  
60

1  
2  
3  
4  
5  
6 was 65 years, 76.8% were male, 87.7% had ST-elevation myocardial infarction. No  
7  
8  
9 significant differences in patient background based on rs1333049 genotypes were  
10  
11  
12 detected.

13  
14  
15 In the primary prevention setting, the rs1333049 C allele was associated with  
16  
17 increased susceptibility to AMI (OR 1.20 per C allele increase, 95% CI 1.09-1.33,  $p=$   
18  
19  $2.3 \times 10^{-4}$ ; and OR 1.38 CC vs CG/GG, 95% CI 1.17-1.62,  $p=8.7 \times 10^{-5}$ ) compared to  
20  
21 1,373 healthy Japanese controls (Figure 3). The frequencies of the CC, CG, and GG  
22  
23 genotypes of rs1333049 were 28.4% (574/2022), 49.3% (997/2022), and 22.3%  
24  
25 (451/2022), respectively, among the study population, and 22.4% (307/1373), 52.3%  
26  
27 (718/1373), and 25.3% (348/1373), respectively, among the healthy controls.  
28  
29  
30  
31  
32  
33

34  
35 In the secondary prevention setting, 43 ReMI (4 for CC, 30 for CG, and 9 for GG  
36  
37 genotypes) occurred during a 1-year follow-up period after survival discharge for their  
38  
39 first AMI. Kaplan-Meier analysis revealed that incidence of ReMI differed between  
40  
41 patients with the CC and CG/GG genotypes (log-rank  $p=0.005$ ) (Figure 2).  
42  
43  
44 Multivariate Cox regression analysis revealed that the CC genotype was associated with  
45  
46 a lower risk of ReMI after survival discharge compared to the CG/GG genotypes  
47  
48 (adjusted HR 0.20, 95% CI 0.06-0.65,  $p=0.007$ ). Subgroup analysis demonstrated that  
49  
50 the association between the rs1333049 CC genotype and lower incidence of 1-year  
51  
52  
53  
54  
55  
56  
57  
58  
59  
60



1  
2  
3  
4  
5  
6 ReMI was common to all subgroups, and no significant gene-drug interactions were  
7  
8 detected (Figure 4).  
9  
10

## 11 12 13 14 15 **DISCUSSION**

16  
17 The present study demonstrated that, in the secondary prevention setting of AMI,  
18  
19 homozygous carriers of the rs1333049 risk allele (CC genotype) on chromosome 9p21  
20  
21 had a reduced incidence of ReMI, whereas the C allele did have conferred susceptibility  
22  
23 to their first AMI. This result is of clinical importance because this is the first study to  
24  
25 clearly show a change of the susceptibility risk of the 9p21 variant to AMI between  
26  
27 before and after the first AMI, namely, between the primary and secondary prevention  
28  
29 settings.  
30  
31  
32  
33  
34  
35  
36

37  
38 Historically, 9p21 SNP was identified as a susceptibility variant of CAD with GWAS  
39  
40 using data from Wellcome Trust Case Control Consortium in 2007.<sup>3</sup> Many other  
41  
42 GWASs have also revealed the same association between 9p21 SNP and CAD and/or  
43  
44 myocardial infarction.<sup>3-8</sup> In addition, one report by Chan et al. suggested the presence of  
45  
46 common pathway to develop CAD and myocardial infarction via 9p21 SNP.<sup>11</sup> Thus,  
47  
48 9p21 SNP is now considered as one of the most robust susceptibility variants of  
49  
50 myocardial infarction and/or CAD in the primary prevention setting. To date, three  
51  
52  
53  
54  
55  
56  
57  
58  
59  
60

1  
2  
3  
4  
5  
6 major studies have assessed the association between 9p21 genetic variation and ReMI  
7  
8 rates after ACS (Table 2)<sup>12-14</sup>: the Italian Genetic study and TexGen registry reported a  
9  
10 lack of association with ReMI events after early-onset myocardial infarction and ACS  
11  
12 (fraction unknown), respectively,<sup>13-14</sup> while the GRACE genetic study suggested a  
13  
14 susceptibility risk of 9p21 SNPs for ReMI after ACS (STEMI 27.2%, non-STEMI  
15  
16 43.3%, and unstable angina 29.5%).<sup>12</sup> Since Buyschaert et al. also reported that the  
17  
18 statistical significance of the susceptibility risk of 9p21 disappeared after full  
19  
20 adjustment with patient background in the GRACE genetic study,<sup>12</sup> it is possible to  
21  
22 interpret the results of these 3 studies as a lack of 9p21 susceptibility to reoccurrence of  
23  
24 AMI in post-ACS patients.<sup>12-14</sup> These findings are of clinical significance because they  
25  
26 suggested a modification of the genetic risk of 9p21 by the secondary prevention  
27  
28 programs after ACS. However, these studies only examined the susceptibility impact of  
29  
30 9p21 SNPs to the reoccurrence of AMI without comparison with that to the first AMI  
31  
32 (ACS) in their study cohort, which could be a limitation to discuss modification of  
33  
34 genetic risk with secondary prevention programs.  
35  
36  
37  
38  
39  
40  
41  
42  
43  
44  
45  
46  
47  
48

49 In this point of view, it is noteworthy that the present study clearly showed a change  
50  
51 of the 9p21 susceptibility risk to AMI between before and after the first onset of AMI in  
52  
53 the same population. In the present study, the results showed that the rs1333049 C allele  
54  
55  
56  
57  
58  
59  
60

1  
2  
3  
4  
5  
6 was associated with onset of the first AMI (OR 1.20, 95% CI 1.09-1.33,  $p=2.3*10^{-4}$ ),  
7  
8  
9 which was consistent with the results of several previous studies in the primary  
10  
11 prevention settings.<sup>3-8</sup> Interestingly, however, the present study also demonstrated that  
12  
13 patients with the CC genotype had a lower incidence of 1-year ReMI (adjusted HR, 0.20,  
14  
15 95% CI 0.06-0.65,  $p=0.007$ ) as a novel finding. These observations suggested that the  
16  
17 risk of 9p21 variant seen in the primary prevention setting of the present study  
18  
19 population was modified in the secondary prevention setting. Although it is speculative,  
20  
21 it is considered that modification of genetic risk of rs1333049 C allele might have  
22  
23 unmasked the risk of rs1333049 G allele in the secondary prevention setting  
24  
25 (Supplementary Figure 2). However, it should be discussed why the 9p21 rs1333049  
26  
27 CC genotype was associated with reduced incidence of ReMI in the present study, while  
28  
29 not in the previous 3 studies.<sup>12-14</sup> One possible explanation for this discrepancy between  
30  
31 the previous and our studies is that we only include post-AMI patient who were treated  
32  
33 with emergent PCI on admission and survived to discharge, whereas all previous studies  
34  
35 included all of the patients hospitalized for AMI or ACS and thus include ReMI during  
36  
37 the acute stage of ACS as an endpoint. Considering that ReMI occurring during the  
38  
39 acute stage of ACS was likely associated with lesion- or procedure-related backgrounds  
40  
41 such as re-occlusion of the culprit lesion due to thrombus or mechanical acute closures  
42  
43  
44  
45  
46  
47  
48  
49  
50  
51  
52  
53  
54  
55  
56  
57  
58  
59  
60

1  
2  
3  
4  
5  
6 rather than genetic background, inclusion of these ReMI might have made the  
7  
8 interpretation of the results difficult in the previous studies. In addition, the patient  
9  
10 selection limited to those treated with primary PCI for the first AMI in the present study  
11  
12 might have clearly elucidated the 9p21-related susceptibility to ReMI in the secondary  
13  
14 prevention cohort.  
15  
16  
17  
18  
19

20  
21 The 9p21 locus is adjacent to the tumor suppressor genes CDKN2A and CDKN2B.<sup>8</sup>  
22  
23 Although the mechanism by which variation in the 9p21 locus increases AMI  
24  
25 susceptibility in the primary prevention setting remains unclear,<sup>8</sup> the evidence-based  
26  
27 secondary prevention programs might have masked the susceptibility risk of the 9p21  
28  
29 rs1333049 C allele to ReMI after ACS in the present study (Figure 2), possibly via  
30  
31 stabilizing coronary plaques.<sup>9-14,22-23</sup> Indeed, Do et al. reported that the impact of 9p21  
32  
33 genetic variation can be modified by increasing the dietary intake of vegetables,<sup>24</sup>  
34  
35 suggesting a role of secondary prevention programs including dietary practice. Thus,  
36  
37 further studies are warranted to investigate whether and how the secondary prevention  
38  
39 programs with evidence-based medication and lifestyle modification can reduce the risk  
40  
41 of ReMI in patients with 9p21 genetic variants in the near future. In particular, the  
42  
43 potential interaction of the rs1333049 SNP with secondary prevention medications  
44  
45 warrants further investigation, because gene-drug interactions have already been  
46  
47  
48  
49  
50  
51  
52  
53  
54  
55  
56  
57  
58  
59  
60

1  
2  
3  
4  
5  
6 detected in cardiovascular patients treated with warfarin, clopidogrel, and statin.<sup>25-27</sup>  
7  
8

9 The present study has several limitations that warrant mention. First, because our  
10 study population only consisted of patients who provided written informed consent at  
11 survival discharge, there may have been selection bias as well as survival bias since high  
12 risk patients carrying C allele might have died more frequently than patients with GG  
13 genotype during hospitalization. Second, the number of recurrent myocardial infarction  
14 was relatively small and our study lacked a replication cohort to validate our  
15 observations. Therefore, replication studies with a larger sample are warranted to  
16 confirm our observations. However, it is often difficult to have a validation cohort in a  
17 prospective observational study design.<sup>28</sup> Indeed, all studies presented in Table 2 did not  
18 include a replication cohort. Third, therapeutic regimen of AMI such as of coronary  
19 stenting and dual-antiplatelet therapy advanced and varied across the study period. Forth,  
20 data regarding the mechanism and culprit lesion of ReMI were not available. Since  
21 ReMI can occur through a variety of mechanisms such as acute stent thrombosis of  
22 culprit lesion, excessive intimal proliferation of stented vessels, and plaque rupture of  
23 new atherosclerotic lesion, detailed analysis for the mechanism of ReMI is ideal. Fifth,  
24 patient backgrounds and primary preventive medications were not adjusted in the  
25 case-control association study in the primary prevention setting. Finally, it is possible  
26  
27  
28  
29  
30  
31  
32  
33  
34  
35  
36  
37  
38  
39  
40  
41  
42  
43  
44  
45  
46  
47  
48  
49  
50  
51  
52  
53  
54  
55  
56  
57  
58  
59  
60

1  
2  
3  
4  
5  
6 that unmeasured confounding factors influenced the study outcomes due to the inherent  
7  
8  
9 nature of observational registry. The data should be interpreted within the context of  
10  
11  
12 these potential limitations.

### 13 14 15 16 17 18 **Conclusions**

19  
20 We demonstrated that homozygous carriers of AMI susceptibility variant rs1333049  
21  
22  
23 SNP C allele on chromosome 9p21 showed a reduced risk of 1-year ReMI after survival  
24  
25  
26 discharge, suggesting a modification of genetic susceptibility of AMI with secondary  
27  
28  
29 prevention programs.  
30  
31  
32  
33  
34

### 35 36 37 **Acknowledgements**

38 We thank Mariko Kishida, Rie Nagai, Nanase Muraoka, Hiroko Takemori, Akiko  
39  
40 Yamagishi, Kumiko Miyoshi, Chizuru Hamaguchi, Hiroko Machida, Mariko Yoneda,  
41  
42  
43 Nagisa Yoshioka, Mayuko Tomatsu, Kyoko Tatsumi, Tomoko Mizuoka, Shigemi  
44  
45  
46 Kohara, Junko Tsugawa, Junko Isotani, Sachiko Ashibe, and all other OACIS research  
47  
48  
49 coordinators and nurses for their excellent assistance with data collection.  
50  
51  
52  
53  
54  
55  
56  
57  
58  
59  
60

**Contributors**

All authors (MH, YS, DN, SS, MU, SM, KO, MN, HS, TK, SN, TH, TT, MH, and IK) participated in the study conception and design, acquisition of data, analysis and interpretation of data, drafting the article and revising it critically for important intellectual content, and final approval of the manuscript

**Funding**

This work was supported by Grants-in-Aid for University and Society Collaboration (#19590816 and #19390215) from the Japanese Ministry of Education, Culture, Sports, Science and Technology, Tokyo, Japan.

**Competing interests**

Dr. Komuro has received research grants and speaker's fees from Takeda Pharmaceutical Company, Astellas Pharma, DAIICHI SANKYO COMPANY, Boehringer Ingelheim, Novartis Pharma and Shionogi. No other authors have relationships with industry to disclose or financial associations that might pose a conflict of interest in connection with the submitted article.

**Ethics approval**

The study protocol complied with the Helsinki Declaration and the guidelines for genomic/genetic research issued by the Japanese government. The study was approved

1  
2  
3  
4  
5  
6 by the institutional ethical committee of each participating institution.  
7

8  
9 **Patient consent**

10  
11 Obtained.  
12

13  
14 **Provenance and peer review**

15  
16 Not commissioned; externally peer reviewed.  
17  
18

19  
20 **Data sharing statement**

21  
22 No additional data available.  
23  
24

25  
26 **Open Access**

27  
28  
29 This is an Open Access article distributed in accordance with the Creative Commons  
30  
31 Attribution Non Commercial (CC BY-NC 3.0) license, which permits others to  
32  
33 distribute, remix, adapt, build upon this work noncommercially, and license their  
34  
35 derivative works on different terms, provided the original work is properly cited and the  
36  
37 use is non-commercial. See: <http://creativecommons.org/licenses/by-nc/3.0/>  
38  
39  
40  
41  
42  
43  
44  
45  
46  
47  
48  
49  
50  
51  
52  
53  
54  
55  
56  
57  
58  
59  
60



## References

1. White HD, Chew DP. Acute myocardial infarction. *Lancet* 2008;372:570-584.
2. Marenberg ME, Risch N, Berkman LF, et al. Genetic susceptibility to death from coronary heart disease in a study of twins. *N Engl J Med* 1994;330:1041-1046.
3. Samani NJ, Erdmann J, Hall AS, et al; WTCCC and the Cardiogenics Consortium. Genomewide association analysis of coronary artery disease. *N Engl J Med* 2007;357:443-453.
4. McPherson R, Pertsemlidis A, Kavaslar N, et al. A common allele on chromosome 9 associated with coronary heart disease. *Science* 2007;316:1488-1491.
5. Helgadottir A, Thorleifsson G, Manolescu A, et al. A common variant on chromosome 9p21 affects the risk of myocardial infarction. *Science* 2007;316:1491-1493.
6. Myocardial Infarction Genetics Consortium, Kathiresan S, Voight BF, Purcell S, et al. Genome-wide association of early-onset myocardial infarction with single nucleotide polymorphisms and copy number variants. *Nat Genet* 2009;41:334-341.
7. Schunkert H, König IR, Kathiresan S, et al; CARDIoGRAM Consortium. Large-scale association analysis identifies 13 new susceptibility loci for coronary artery disease. *Nat Genet* 2011;43:333-338.

- 1  
2  
3  
4  
5  
6 8. Schunkert H, Götz A, Braund P, et al; Cardiogenics Consortium. Repeated  
7  
8  
9 replication and a prospective meta-analysis of the association between chromosome  
10  
11 9p21.3 and coronary artery disease. *Circulation* 2008;117:1675-1684.  
12  
13  
14 9. Horne BD, Carlquist JF, Muhlestein JB, et al. Association of variation in the  
15  
16 chromosome 9p21 locus with myocardial infarction versus chronic coronary artery  
17  
18 disease. *Circ Cardiovasc Genet* 2008;1:85-92.  
19  
20  
21 10. Dandona S, Stewart AF, Chen L, et al. Gene dosage of the common variant 9p21  
22  
23 predicts severity of coronary artery disease. *J Am Coll Cardiol* 2010;56:479-486.  
24  
25  
26 11. Chan K, Patel RS, Newcombe P, et al. Association between the chromosome 9p21  
27  
28 locus and angiographic coronary artery disease burden: a collaborative  
29  
30 meta-analysis. *J Am Coll Cardiol* 2013;61:957-970.  
31  
32  
33 12. Buyschaert I, Carruthers KF, Dunbar DR, et al. A variant at chromosome 9p21 is  
34  
35 associated with recurrent myocardial infarction and cardiac death after acute  
36  
37 coronary syndrome: the GRACE Genetics Study. *Eur Heart J* 2010;31:1132-1141.  
38  
39  
40 13. Ardissino D, Berzuini C, Merlini PA, et al; Italian Atherosclerosis, Thrombosis and  
41  
42 Vascular Biology Investigators. Influence of 9p21.3 genetic variants on clinical and  
43  
44 angiographic outcomes in early-onset myocardial infarction. *J Am Coll Cardiol*  
45  
46 2011;58:426-434.  
47  
48  
49  
50  
51  
52  
53  
54  
55  
56  
57  
58  
59  
60

- 1  
2  
3  
4  
5  
6 14. Virani SS, Brautbar A, Lee VV, et al. Chromosome 9p21 single nucleotide  
7  
8 polymorphisms are not associated with recurrent myocardial infarction in patients  
9  
10 with established coronary artery disease. *Circ J* 2012;76:950-956.  
11  
12  
13  
14 15. Hara M, Sakata Y, Nakatani D, et al; Osaka Acute Coronary Insufficiency Study  
15  
16 (OACIS) Investigators. Low levels of serum n-3 polyunsaturated fatty acids are  
17  
18 associated with worse heart failure-free survival in patients after acute myocardial  
19  
20 infarction. *Circ J* 2013;1:153-162.  
21  
22  
23  
24 25. Nakatani D, Sakata Y, Suna S, et al; Osaka Acute Coronary Insufficiency Study  
26  
27 (OACIS) Investigators. Impact of beta blockade therapy on long-term mortality after  
28  
29 ST-segment elevation acute myocardial infarction in the percutaneous coronary  
30  
31 intervention era. *Am J Cardiol* 2013;111:457-464.  
32  
33  
34  
35 36. Matsumoto S, Nakatani D, Sakata Y, et al; Osaka Acute Coronary Insufficiency  
37  
38 Study (OACIS) Group. Elevated serum heart-type fatty acid-binding protein in the  
39  
40 convalescent stage predicts long-term outcome in patients surviving acute  
41  
42 myocardial infarction. *Circ J* 2013;77:1026-1032.  
43  
44  
45  
46 47. Kitamura T, Sakata Y, Nakatani D, et al. Living alone and risk of cardiovascular  
48  
49 events following discharge after acute myocardial infarction in Japan. *J Cardiol*  
50  
51 2013;62:257-262.  
52  
53  
54  
55  
56  
57  
58  
59  
60

- 1  
2  
3  
4  
5  
6 19. Usami M, Sakata Y, Nakatani D, et al. Clinical impact of acute hyperglycemia on  
7  
8 development of diabetes mellitus in non-diabetic patients with acute myocardial  
9  
10 development of diabetes mellitus in non-diabetic patients with acute myocardial  
11  
12 infarction. *J Cardiol* 2013 [Epub ahead of print] (DOI: 10.1016/j.jjcc.2013.08.012.)  
13  
14  
15 20. No authors listed. Nomenclature and criteria for diagnosis of ischemic heart disease.  
16  
17 Report of the Joint International Society and Federation of Cardiology/World Health  
18  
19 Organization task force on standardization of clinical nomenclature. *Circulation*  
20  
21 1979;59:607-609  
22  
23  
24  
25  
26 21. Ohnishi Y, Tanaka T, Ozaki K, et al. A high-throughput SNP typing system for  
27  
28 genome-wide association studies. *J Hum Genet* 2001;46:471-477.  
29  
30  
31  
32 22. Kushner FG, Hand M, Smith SC Jr, et al; American College of Cardiology  
33  
34 Foundation/American Heart Association Task Force on Practice Guidelines. 2009  
35  
36 Focused Updates: ACC/AHA Guidelines for the Management of Patients With  
37  
38 ST-Elevation Myocardial Infarction (updating the 2004 Guideline and 2007 Focused  
39  
40 Update) and ACC/AHA/SCAI Guidelines on Percutaneous Coronary Intervention  
41  
42 (updating the 2005 Guideline and 2007 Focused Update): a report of the American  
43  
44 College of Cardiology Foundation/American Heart Association Task Force on  
45  
46 Practice Guidelines. *Circulation* 2009;120:2271-2306.  
47  
48  
49  
50  
51  
52  
53  
54  
55  
56  
57  
58  
59  
60

- 1  
2  
3  
4  
5  
6 23. Tsunoda R, Sakamoto T, Kojima S, et al. Recurrence of angina pectoris after  
7  
8 percutaneous coronary intervention is reduced by statins in Japanese patients. *J*  
9  
10 *Cardiol* 2011;58:208-215.  
11  
12
- 13  
14 24. Do R, Xie C, Zhang X, et al; INTERHEART investigators. The effect of  
15  
16 chromosome 9p21 variants on cardiovascular disease may be modified by dietary  
17  
18 intake: evidence from a case/control and a prospective study. *PLoS Med*  
19  
20 2011;8:e1001106. (DOI 10.1371, last accessed November 11, 2013)  
21  
22  
23  
24
- 25  
26 25. International Warfarin Pharmacogenetics Consortium, Klein TE, Altman RB,  
27  
28 Eriksson N, et al. Estimation of the warfarin dose with clinical and pharmacogenetic  
29  
30 data. *N Engl J Med* 2009;360:753-764.  
31  
32  
33  
34
- 35 26. Simon T, Verstuyft C, Mary-Krause M, et al; French Registry of Acute ST-Elevation  
36  
37 and Non-ST-Elevation Myocardial Infarction (FAST-MI) Investigators. Genetic  
38  
39 determinants of response to clopidogrel and cardiovascular events. *N Engl J Med*  
40  
41 2009;360:363-375.  
42  
43  
44  
45
- 46 27. SEARCH Collaborative Group, Link E, Parish S, Armitage J, et al. SLCO1B1  
47  
48 variants and statin-induced myopathy--a genomewide study. *N Engl J Med*  
49  
50 2008;359:789-799.  
51  
52  
53  
54
- 55 28. Ginsburg GS, Shah SH, McCarthy JJ. Taking cardiovascular genetic association  
56  
57  
58  
59  
60

Manuscript ID bmjopen-2014-005438.R1

1  
2  
3  
4  
5  
6 studies to the next level. *J Am Coll Cardiol* 2007;50:930-932.  
7  
8  
9  
10  
11  
12  
13  
14  
15  
16  
17  
18  
19  
20  
21  
22  
23  
24  
25  
26  
27  
28  
29  
30  
31  
32  
33  
34  
35  
36  
37  
38  
39  
40  
41  
42  
43  
44  
45  
46  
47  
48  
49  
50  
51  
52  
53  
54  
55  
56  
57  
58  
59  
60

For peer review only

Table 1. Patient Background Based on rs1333049 Genotype

| Parameter               | Overall<br>(n=2022) | CC<br>(n=574)       | CG<br>(n=997)       | GG<br>(n=451)       | p-value |
|-------------------------|---------------------|---------------------|---------------------|---------------------|---------|
| Age, years              | 65 (57-73)          | 65 (57-73)          | 65 (57-73)          | 65 (58-73)          | 0.986   |
| Male, %                 | 76.8                | 78.6                | 75.2                | 77.8                | 0.265   |
| BMI, kg/m <sup>2</sup>  | 23.8<br>(21.9-25.9) | 23.9<br>(21.8-25.7) | 23.7<br>(21.8-25.8) | 23.8<br>(22.0-26.0) | 0.653   |
| STEMI, %                | 87.7                | 88.1                | 86.6                | 89.6                | 0.272   |
| Coronary risk factor    |                     |                     |                     |                     |         |
| Diabetes, %             | 31.6                | 33.0                | 29.7                | 33.7                | 0.227   |
| Hypertension, %         | 60.1                | 61.0                | 59.5                | 60.3                | 0.829   |
| Dyslipidemia, %         | 46.5                | 43.8                | 47.2                | 48.5                | 0.267   |
| Smoking, %              | 64.3                | 63.6                | 64.4                | 65.2                | 0.868   |
| CAG Findings            |                     |                     |                     |                     |         |
| Target lesion           |                     |                     |                     |                     | 0.153   |
| Left main trunk, %      | 1.0                 | 1.0                 | 1.0                 | 1.1                 |         |
| LAD, %                  | 45.1                | 43.2                | 43.7                | 50.3                |         |
| Diagonal branch, %      | 2.9                 | 3.0                 | 2.7                 | 3.1                 |         |
| RCA, %                  | 35.8                | 37.3                | 35.6                | 34.4                |         |
| LCx, %                  | 14.7                | 14.8                | 16.5                | 10.6                |         |
| Graft, %                | 0.1                 | 0.3                 | 0.0                 | 0.0                 |         |
| Unkown, %               | 0.4                 | 0.3                 | 0.4                 | 0.4                 |         |
| Stenting, %             | 88.8                | 90.1                | 87.6                | 90.0                | 0.207   |
| Multivessel disease, %  | 40.2                | 38.6                | 40.1                | 42.4                | 0.473   |
| Peak CPK, IU/L          | 2269<br>(1027-4006) | 2304<br>(1005-4087) | 2242<br>(1026-4041) | 2345<br>(1104-3882) | 0.898   |
| Medication at discharge |                     |                     |                     |                     |         |
| ACEI, %                 | 44.6                | 46.2                | 44.2                | 43.5                | 0.650   |
| ARB, %                  | 40.4                | 38.2                | 41.4                | 41.0                | 0.425   |
| Beta-blocker, %         | 62.0                | 59.9                | 62.5                | 63.4                | 0.466   |
| Calcium-blocker, %      | 13.5                | 13.2                | 13.2                | 14.4                | 0.814   |
| Statin, %               | 53.5                | 50.7                | 54.1                | 55.7                | 0.249   |
| Diuretics, %            | 24.7                | 22.6                | 26.0                | 24.4                | 0.333   |
| Dual anti-platelet, %   | 80.8                | 80.8                | 80.6                | 80.9                | 0.990   |

1  
2  
3  
4  
5  
6 Categorical variables are presented as percentage and continuous variables are presented  
7  
8  
9 as the median (25-75 percentiles). ACEI, angiotensin-converting enzyme inhibitor; ARB,  
10  
11 angiotensin receptor blocker; BMI, body mass index; CAG, coronary angiography; CPK,  
12  
13 creatine phosphokinase; LAD, left anterior descending artery; LCx, left circumflex  
14  
15 artery; RCA, right coronary artery; and STEMI, ST-elevation myocardial infarction.  
16  
17  
18  
19  
20  
21  
22  
23  
24  
25  
26  
27  
28  
29  
30  
31  
32  
33  
34  
35  
36  
37  
38  
39  
40  
41  
42  
43  
44  
45  
46  
47  
48  
49  
50  
51  
52  
53  
54  
55  
56  
57  
58  
59  
60



Table 2. Summary of studies examining the association between 9p21 variants and re-myocardial infarction events after acute coronary syndrome

|                    | OACIS Registry                                         | GRACE Genetic study                                    | Italian Genetic study             | TexGen Registry                   |
|--------------------|--------------------------------------------------------|--------------------------------------------------------|-----------------------------------|-----------------------------------|
| Reference          | —                                                      | 12                                                     | 13                                | 14                                |
| Year               | —                                                      | 2010                                                   | 2011                              | 2012                              |
| SNP                | rs1333049                                              | rs1333049                                              | rs1333040                         | rs1333049                         |
| Pt number          | 2,022                                                  | 2,942                                                  | 1,508                             | 2,067                             |
| Design             | Prospective                                            | Prospective                                            | Prospective                       | Prospective                       |
| Follow-up          | 1 year                                                 | 6 months                                               | 9.95 years                        | 3.2 years                         |
| Population         | Japan                                                  | UK, Belgium, Poland                                    | Italy                             | USA                               |
| Background disease | MI (STEMI 87.7%, non-STEMI 12.3%)                      | ACS (STEMI 27.2%, non-STEMI 43.3%, UA 29.5%)           | Early-onset MI                    | ACS (fraction unknown)            |
| PCI                | 100%                                                   | 47.5%                                                  | 0%                                | 63.6%                             |
| End-point          | ReMI after survival discharge                          | ReMI including in-hospital events                      | ReMI including in-hospital events | ReMI including in-hospital events |
| Conclusion         | Low event rate with homozygous carriers of risk allele | High event rate with risk allele carriers (univariate) | No association                    | No association                    |
| Replication        | None                                                   | None                                                   | None                              | None                              |

ACS, acute coronary syndrome; CAD, coronary artery disease; DES, drug-eluting stent;

MI, myocardial infarction; PCI, percutaneous coronary intervention; Pt, participants;

ReMI, recurrence of myocardial infarction; STEMI, ST-elevation myocardial infarction;

UA, unstable angina.

## Figure Legends

Figure 1. Patient selection flow chart. AMI, acute myocardial infarction; DNA, deoxyribonucleic acid; MI, myocardial infarction; OACIS, Osaka Acute Coronary Insufficiency Study; and PCI, percutaneous coronary intervention.

Figure 2. Kaplan-Meier estimates of re-myocardial infarction event.

Figure 3. Impact of the rs1333049 genotype on the onset and 1-year re-myocardial infarction. AMI, acute myocardial infarction; CI, confidence interval; HR, hazard ratio (CC vs CG/GG); OR, odds ratio (C vs G per allele); and ReMI, re-myocardial infarction

Figure 4. Subgroup analysis of the impact of rs1333049 genotype on 1-year re-myocardial infarction rate. ACEI, angiotensin-converting enzyme inhibitor; ARB, angiotensin receptor blocker; CI, confidence interval; DAPT, dual anti-platelet therapy; HR, hazard ratio; NA, not assessed due to insufficient number of events in the subgroup analysis; and STEMI, ST-elevation myocardial infarction.

Supplementary Figure 1. Linkage disequilibrium of chromosome 9p21 single nucleotide polymorphisms in the present study population. Linkage disequilibrium was evaluated by D prime (left) and R squared (right) using PLINK and Haploview softwares.

Supplementary Figure 2. A possible mechanism for the differential impact of rs1333049

1  
2  
3  
4  
5  
6 genotypes between the primary and secondary prevention settings. (A) Risk of first  
7  
8  
9 acute myocardial infarction (AMI) in the primary prevention setting. (B) Risk of  
10  
11 re-myocardial infarction (ReMI) in the secondary prevention setting. Blue and yellow  
12  
13 bars indicate the susceptibility risks of G (dominant risk) and C (additive risk) alleles,  
14  
15 respectively. In this model, it is assumed that the risk of rs1333049 G allele was not  
16  
17  
18 changed between primary and secondary prevention settings, while the risk of  
19  
20  
21 rs1333049 C allele was reduced by the secondary prevention programs after AMI. In the  
22  
23  
24 primary prevention setting (panel A), the risk of C allele overwhelmed the G allele risk,  
25  
26  
27 making an “additive risk model” of C allele, in which the total risk increased as the  
28  
29  
30 number of C allele increased. On the other hand, in the secondary prevention setting  
31  
32  
33 (panel B), the risk of rs1333049 C allele was reduced and then the risk of G allele  
34  
35  
36 became highlighted, making a so-called “dominant risk model” of rs1333049 G allele.  
37  
38  
39  
40  
41  
42  
43  
44  
45  
46  
47  
48  
49  
50  
51  
52  
53  
54  
55  
56  
57  
58  
59  
60

## Original Research Article

***Reduced risk of recurrent myocardial infarction in homozygous carriers  
of the chromosome 9p21 rs1333049 C risk allele in the contemporary  
percutaneous coronary intervention era: a prospective observational  
study***

Masahiko Hara, MD <sup>1)</sup>, Yasuhiko Sakata, MD, PhD <sup>1)2)3)</sup>, Daisaku Nakatani,  
MD, PhD <sup>1)</sup>, Shinichiro Suna, MD, PhD <sup>1)</sup>, Masaya Usami, MD, PhD <sup>1)</sup>, Sen  
Matsumoto, MD, PhD <sup>1)</sup>, Kouichi Ozaki, PhD <sup>4)</sup>, Masami Nishino, MD, PhD <sup>5)</sup>,  
Hiroshi Sato, MD, PhD <sup>6)</sup>, Tetsuhisa Kitamura, MD, MSc, DrPH <sup>7)</sup>, Shinsuke  
Nanto, MD, PhD <sup>1)2)</sup>, Toshimitsu Hamasaki, PhD <sup>8)</sup>, Toshihiro Tanaka, MD,  
PhD <sup>4)9)</sup>, Masatsugu Hori, MD, PhD <sup>10)</sup>, Issei Komuro, MD, PhD <sup>11)</sup>, on behalf of  
the OACIS Investigators

1) Department of Cardiovascular Medicine, Osaka University Graduate School of  
Medicine, Suita, Japan

2) Department of Advanced Cardiovascular Therapeutics, Osaka University Graduate

1  
2  
3  
4  
5  
6 School of Medicine, Suita, Japan  
7

8  
9 3) Department of Cardiovascular Medicine, Tohoku University Graduate School of  
10  
11  
12 Medicine, Sendai, Japan  
13

14  
15 4) Laboratory for Cardiovascular Diseases, RIKEN Center for Integrative Medical  
16  
17  
18 Sciences, Yokohama, Japan.  
19

20  
21 5) Division of Cardiology, Osaka Rosai Hospital, Sakai, Japan  
22

23  
24 6) School of Human Welfare Studies, Kwansai Gakuin University, Nishinomiya, Japan  
25

26  
27 7) Division of Environmental Medicine and Population Sciences, Department of Social  
28  
29 and Environmental Medicine, Osaka University Graduate School of Medicine, Suita,  
30  
31  
32 Japan  
33

34  
35 8) Department of Biomedical Statistics, Osaka University Graduate School of Medicine,  
36  
37  
38 Suita, Japan  
39

40  
41 9) Department of Human Genetics and Disease Diversity, Tokyo Medical and Dental  
42  
43  
44 University Graduate School of Medical and Dental Sciences, Tokyo, Japan  
45

46  
47 10) Osaka Prefectural Hospital Organization Osaka Medical Center for Cancer and  
48  
49  
50 Cardiovascular Diseases, Osaka, Japan  
51

52  
53 11) Department of Cardiovascular Medicine, The University of Tokyo Graduate School  
54  
55  
56 of Medicine, Tokyo, Japan  
57  
58  
59  
60

1  
2  
3  
4  
5  
6  
7  
8  
9 **Key Words:** 9p21, Acute myocardial infarction, Secondary prevention, and Single  
10  
11  
12 nucleotide polymorphism.  
13

14  
15  
16  
17  
18 Running Title: 9p21 SNP and ReMI  
19

20  
21  
22  
23 Total word count of the text: 2820 words  
24  
25  
26  
27

28  
29 **Address for correspondence:**  
30

31  
32 Yasuhiko Sakata, MD, PhD  
33

34  
35 Department of Cardiovascular Medicine  
36

37  
38 Tohoku University Graduate School of Medicine, 1-1 Seiryomachi, Aoba-ku, Sendai  
39

40  
41 980-8574, Japan.  
42

43  
44 Phone: (81)-22-717-7152  
45

46  
47 Fax: (81)-22-717-7156  
48

49  
50 E-mail: sakatayk@cardiology.med.osaka-u.ac.jp, sakatayk@cardio.med.tohoku.ac.jp  
51  
52  
53  
54  
55  
56  
57  
58  
59  
60

**Abstract**

**Objectives:** It is controversial whether chromosome 9p21 single nucleotide polymorphism (SNP), susceptibility variants for acute myocardial infarction (AMI) in the primary prevention setting, is associated with recurrent myocardial infarction (ReMI) in the secondary prevention setting. The purpose of this study is to evaluate the impact of chromosome 9p21 SNP on ReMI in patients receiving secondary prevention programs after AMI.

**Design:** A prospective observational study.

**Setting:** Osaka Acute Coronary Insufficiency Study (OACIS) in Japan.

**Participants:** 2,022 patients from OACIS database.

**Interventions:** Genotyping of the 9p21 rs1333049 variant.

**Primary outcome measures:** ReMI event after survival discharge for 1 year.

**Results:** A total of 43 ReMI occurred during the 1-year follow-up period. Although the rs1333049 C allele had an increased susceptibility to their first AMI in an additive model when compared with 1373 healthy controls (odds ratio 1.20, 95% confidence interval 1.09-1.33,  $p=2.3 \times 10^{-4}$ ), patients with the CC genotype had a lower incidence of ReMI at 1-year after discharge of AMI (log-rank  $p=0.005$ ). The adjusted hazard ratios of the CC genotype as compared with CG/GG genotypes was 0.20 (0.06-0.65,  $p=0.007$ ).

1  
2  
3  
4  
5  
6 Subgroup analysis demonstrated that the association between the rs1333049 CC  
7  
8  
9 genotype and lower incidence of 1-year ReMI was common to all subgroups.  
10

11 **Conclusions:** Homozygous carriers of the rs1333049 C allele on chromosome 9p21  
12  
13  
14 showed a reduced risk of 1-year ReMI in the contemporary percutaneous coronary  
15  
16  
17 intervention era, although the C allele had conferred susceptibility to their first AMI.  
18  
19  
20  
21  
22  
23  
24  
25  
26  
27  
28  
29  
30  
31  
32  
33  
34  
35  
36  
37  
38  
39  
40  
41  
42  
43  
44  
45  
46  
47  
48  
49  
50  
51  
52  
53  
54  
55  
56  
57  
58  
59  
60



**Strengths and limitations of this study**

- This is the first study to clearly show a change of the susceptibility risk of the 9p21 variant to acute myocardial infarction between the primary and secondary prevention settings in percutaneous coronary intervention era.
- Data regarding the mechanism and culprit lesion of re-myocardial infarction were not available.
- Replication studies with a larger sample are warranted to confirm our observations.

## INTRODUCTION

Acute myocardial infarction (AMI) is one of the leading causes of death and disability worldwide.<sup>1</sup> AMI is associated with a positive family history as well as several traditional coronary risk factors including diabetes, hypertension, dyslipidemia, and smoking, suggesting that the pathogenesis of AMI has a substantial genetic component.<sup>2</sup> Genome-wide association studies (GWAS) have identified several genetic loci that confer susceptibility to AMI and coronary artery disease (CAD) in the primary prevention setting.<sup>3-7</sup> Among these genetic variants, single nucleotide polymorphisms (SNPs) on chromosome 9p21 are the most common and significant susceptibility risk factors for AMI and CAD, regardless of race.<sup>3-11</sup> However, it remains controversial whether chromosome 9p21 SNPs are associated with recurrent myocardial infarction (ReMI) in post-AMI patients receiving the evidence-based secondary prevention programs.<sup>12-14</sup>

For example, the Italian Genetic study and TexGen registry revealed that 9p21 genetic variation was not associated with ReMI events after early-onset myocardial infarction and acute coronary syndrome (ACS), respectively,<sup>13-14</sup> while the GRACE genetic study showed that risk allele carriers of 9p21 SNPs had a higher incidence of ReMI after ACS.<sup>12</sup> One possible explanation for this discrepancy among these three

1  
2  
3  
4  
5  
6 studies is an involvement of in-hospital ReMI as an endpoint. It is reported that 9p21  
7  
8  
9 SNPs increase the risk of AMI onset by promoting the development and progression of  
10  
11  
12 coronary plaque deposition, rather than increasing susceptibility to plaque rupture.<sup>9-14</sup>  
13  
14  
15 Thus, inclusion of acute phase ReMI might have made the interpretation difficult in  
16  
17  
18 these 9p21 variant studies, as most of ReMI occurring during the acute phase of AMI  
19  
20  
21 were likely caused by 9p21-independent mechanisms, such as re-occlusion of the culprit  
22  
23  
24 lesion and/or thrombosis. Therefore, to simply assess the susceptibility impact of 9p21  
25  
26  
27 to ReMI in the secondary prevention settings, it may be better to include post-AMI  
28  
29  
30 patients only who survived the acute stage and received the state of the art secondary  
31  
32  
33 prevention program after discharge.

34  
35 The aim of the present study was to investigate the susceptibility impact of 9p21  
36  
37  
38 genetic variation on ReMI in consecutive 2,022 patients with a first AMI who were  
39  
40  
41 registered in the Osaka Acute Coronary Insufficiency Study (OACIS),<sup>15-19</sup> treated with  
42  
43  
44 emergent percutaneous coronary intervention (PCI), and discharged alive.

## 45 46 47 48 49 **METHODS**

### 50 51 52 **The OACIS**

53  
54  
55 The OACIS is a multicenter, prospective, observational registry for AMI in Japan that  
56  
57  
58  
59  
60

1  
2  
3  
4  
5  
6 was initiated in April 1998 among 25 collaborating hospitals. The OACIS is designed to  
7  
8  
9 assess patient demographics including genomic information, therapeutic procedures,  
10  
11  
12 and subsequent clinical events in AMI patients. All study candidates were informed  
13  
14  
15 about data collection, blood sampling, and genotyping, and provided written informed  
16  
17  
18 consent. Research cardiologists and trained research nurses recorded data using a  
19  
20  
21 specific reporting form. The diagnosis of AMI was based on the World Health  
22  
23 Organization criteria,<sup>20</sup> which required 2 of the following 3 criteria to be met: (1)  
24  
25  
26 clinical history of central chest pressure, pain, or tightness lasting  $\geq 30$  min; (2) ST  
27  
28  
29 segment elevation  $>0.1$  mV in at least one standard or 2 precordial leads; and (3) a rise  
30  
31  
32 in serum creatinine phosphokinase concentration to more than twice the normal  
33  
34  
35 laboratory value. The OACIS is registered to the University Hospital Medical  
36  
37  
38 Information Network Clinical Trials Registry (UMIN-CTR) in Japan (ID:  
39  
40  
41 UMIN000004575). Other details of OACIS are described elsewhere.<sup>15-19</sup>  
42  
43  
44  
45  
46

### 47 **Study design**

48  
49 Among 10,074 consecutive AMI patients registered in the OACIS between April 1998  
50  
51  
52 and April 2011, 2,045 patients who had a first AMI, underwent emergent PCI, survived  
53  
54  
55 to discharge, and gave a written informed consent to the study were enrolled in the  
56  
57  
58  
59  
60

1  
2  
3  
4  
5  
6 present study. Exclusion criteria included a history of previous myocardial infarction or  
7  
8  
9 PCI, in-hospital death cases, and lack of written informed consent for genetic study and  
10  
11  
12 deoxyribonucleic acid (DNA) sampling. Genomic DNA was extracted from peripheral  
13  
14  
15 blood samples using a commercially available kit (QIAamp DNA Blood Midi Kit;  
16  
17  
18 Qiagen, Hilden, Germany). Patients were genotyped for the rs1333049 SNP of  
19  
20  
21 chromosome 9p21 using the multiplex-polymerase chain reaction-based invader assay  
22  
23  
24 as previously described.<sup>21</sup> The reason why we focused on the rs1333049 was that it is  
25  
26  
27 the most widely studied 9p21 genetic variants in both the primary and secondary  
28  
29  
30 prevention settings.<sup>8,10-12,14</sup> We also confirmed that rs1333049 is in linkage  
31  
32  
33 disequilibrium with other major 9p21 SNPs in the OACIS registry (Supplementary  
34  
35  
36 Figure 1). Finally, the genotyping success rate for rs1333049 was 98.9% and 2,022  
37  
38  
39 patients were successfully genotyped and analyzed for the susceptibility to ReMI within  
40  
41  
42 a year after survival discharge (Figure 1). To validate the association of the rs1333049  
43  
44  
45 SNP with the first AMI, we performed a case-control association study between the  
46  
47  
48 present study population and healthy Japanese controls. Control blood samples of  
49  
50  
51 healthy Japanese adults (n=1,373, mean age, 38.6 years old, 59% male) were obtained  
52  
53  
54 from the Health Science Research Resources Bank (Osaka, Japan). The patient  
55  
56  
57 backgrounds and primary preventive medications were not adjusted in this case-control  
58  
59  
60

1  
2  
3  
4  
5  
6 association study in the primary prevention setting, since these data were not available  
7  
8  
9 in commercially obtained healthy controls and medications before first AMI were not  
10  
11  
12 available in our study population in detail.  
13

### 14 15 16 17 18 **Statistical analysis** 19

20  
21 Categorical variables were compared by the chi-square test, and continuous variables  
22  
23 were compared by the Kruskal-Wallis test. The impact of the rs1333049 genotype on  
24  
25 the onset of AMI was assessed in both the primary and secondary prevention settings.  
26  
27 The impact of rs1333049 on the onset of AMI was calculated as odds ratios (OR) and  
28  
29 95% confidence intervals (CI) in an additive model (OR per C allele increase). In the  
30  
31 secondary prevention analysis, the Kaplan-Meier method was used to estimate event  
32  
33 rates. Because the Kaplan-Meier analysis revealed that the incidence of ReMI differed  
34  
35 between the CC and CG/GG genotypes of rs1333049 (Figure 2), the differences  
36  
37 between CC and CG/GG genotypes were assessed by the log-rank tests. In addition, a  
38  
39 Cox regression model was used to compare the 1-year prognostic impacts between the  
40  
41 rs1333049 CC and CG/GG genotypes based on the estimate hazard ratios (HR) and  
42  
43 95% CI. Multivariate Cox regression analysis was performed to reduce the confounding  
44  
45 effects of variations in patient backgrounds using age, gender, body mass index,  
46  
47  
48  
49  
50  
51  
52  
53  
54  
55  
56  
57  
58  
59  
60

1  
2  
3  
4  
5  
6 ST-elevation myocardial infarction, diabetes, hypertension, dyslipidemia, smoking,  
7  
8  
9 target lesion, multivessel disease, peak creatinine phosphokinase, and prescription of  
10  
11  
12 angiotensin-converting enzyme inhibitor, angiotensin receptor blocker, beta-blockers,  
13  
14  
15 calcium channel blockers, statins, diuretics, and dual anti-platelet agents as covariates.  
16  
17  
18 Hence, the final multivariate model included all the above mentioned covariates  
19  
20  
21 regardless of the univariate results shown in Supplementary Table 1 because we  
22  
23  
24 assumed that even non-significant differences in these covariates could be confounders  
25  
26  
27 and should be adjusted. The gene-drug interactions were evaluated using p for  
28  
29  
30 interaction between genotype and each drug tested. Statistical significance was set as  
31  
32  
33  $p < 0.05$  for comparison of patient background or gene-drug interaction. Bonferroni  
34  
35  
36 correction for multiple testing was employed during the secondary prevention analysis  
37  
38  
39 and statistical significance was set as  $p < 0.025$  (0.05 divided by the number of  
40  
41  
42 independent testing; log-rank test and multiple Cox regression analysis). All statistical  
43  
44  
45 analyses were performed using SAS version 9.3 (SAS Institute Inc., Cary, NC) or R  
46  
47  
48 software packages version 2.15.1 (R Development Core Team).

## 52 RESULTS

55 Patient characteristics and medications at discharge are shown in Table 1. Median age  
56  
57  
58  
59  
60

1  
2  
3  
4  
5  
6 was 65 years, 76.8% were male, 87.7% had ST-elevation myocardial infarction. No  
7  
8  
9 significant differences in patient background based on rs1333049 genotypes were  
10  
11  
12 detected.

13  
14  
15 In the primary prevention setting, the rs1333049 C allele was associated with  
16  
17 increased susceptibility to AMI (OR 1.20 per C allele increase, 95% CI 1.09-1.33,  $p=$   
18  
19  $2.3 \times 10^{-4}$ ; and OR 1.38 CC vs CG/GG, 95% CI 1.17-1.62,  $p=8.7 \times 10^{-5}$ ) compared to  
20  
21 1,373 healthy Japanese controls (Figure 3). The frequencies of the CC, CG, and GG  
22  
23 genotypes of rs1333049 were 28.4% (574/2022), 49.3% (997/2022), and 22.3%  
24  
25 (451/2022), respectively, among the study population, and 22.4% (307/1373), 52.3%  
26  
27 (718/1373), and 25.3% (348/1373), respectively, among the healthy controls.  
28  
29  
30  
31  
32  
33

34  
35 In the secondary prevention setting, 43 ReMI (4 for CC, 30 for CG, and 9 for GG  
36  
37 genotypes) occurred during a 1-year follow-up period after survival discharge for their  
38  
39 first AMI. Kaplan-Meier analysis revealed that incidence of ReMI differed between  
40  
41 patients with the CC and CG/GG genotypes (log-rank  $p=0.005$ ) (Figure 2).  
42  
43  
44 Multivariate Cox regression analysis revealed that the CC genotype was associated with  
45  
46 a lower risk of ReMI after survival discharge compared to the CG/GG genotypes  
47  
48 (adjusted HR 0.20, 95% CI 0.06-0.65,  $p=0.007$ ). Subgroup analysis demonstrated that  
49  
50 the association between the rs1333049 CC genotype and lower incidence of 1-year  
51  
52  
53  
54  
55  
56  
57  
58  
59  
60



1  
2  
3  
4  
5  
6 ReMI was common to all subgroups, and no significant gene-drug interactions were  
7  
8  
9 detected (Figure 4).  
10

## 11 12 13 14 15 **DISCUSSION**

16  
17  
18 The present study demonstrated that, in the secondary prevention setting of AMI,  
19  
20 homozygous carriers of the rs1333049 risk allele (CC genotype) on chromosome 9p21  
21  
22 had a reduced incidence of ReMI, whereas the C allele did have conferred susceptibility  
23  
24 to their first AMI. This result is of clinical importance because this is the first study to  
25  
26 clearly show a change of the susceptibility risk of the 9p21 variant to AMI between  
27  
28 before and after the first AMI, namely, between the primary and secondary prevention  
29  
30 settings.  
31  
32  
33  
34  
35  
36

37  
38 Historically, 9p21 SNP was identified as a susceptibility variant of CAD with GWAS  
39  
40 using data from Wellcome Trust Case Control Consortium in 2007.<sup>3</sup> Many other  
41  
42 GWASs have also revealed the same association between 9p21 SNP and CAD and/or  
43  
44 myocardial infarction.<sup>3-8</sup> In addition, one report by Chan et al. suggested the presence of  
45  
46 common pathway to develop CAD and myocardial infarction via 9p21 SNP.<sup>11</sup> Thus,  
47  
48 9p21 SNP is now considered as one of the most robust susceptibility variants of  
49  
50 myocardial infarction and/or CAD in the primary prevention setting. To date, three  
51  
52  
53  
54  
55  
56  
57  
58  
59  
60

1  
2  
3  
4  
5  
6 major studies have assessed the association between 9p21 genetic variation and ReMI  
7  
8 rates after ACS (Table 2)<sup>12-14</sup>: the Italian Genetic study and TexGen registry reported a  
9  
10 lack of association with ReMI events after early-onset myocardial infarction and ACS  
11  
12 (fraction unknown), respectively,<sup>13-14</sup> while the GRACE genetic study suggested a  
13  
14 susceptibility risk of 9p21 SNPs for ReMI after ACS (STEMI 27.2%, non-STEMI  
15  
16 43.3%, and unstable angina 29.5%).<sup>12</sup> Since Buyschaert et al. also reported that the  
17  
18 statistical significance of the susceptibility risk of 9p21 disappeared after full  
19  
20 adjustment with patient background in the GRACE genetic study,<sup>12</sup> it is possible to  
21  
22 interpret the results of these 3 studies as a lack of 9p21 susceptibility to reoccurrence of  
23  
24 AMI in post-ACS patients.<sup>12-14</sup> These findings are of clinical significance because they  
25  
26 suggested a modification of the genetic risk of 9p21 by the secondary prevention  
27  
28 programs after ACS. However, these studies only examined the susceptibility impact of  
29  
30 9p21 SNPs to the reoccurrence of AMI without comparison with that to the first AMI  
31  
32 (ACS) in their study cohort, which could be a limitation to discuss modification of  
33  
34 genetic risk with secondary prevention programs.  
35  
36  
37  
38  
39  
40  
41  
42  
43  
44  
45  
46  
47  
48

49  
50 In this point of view, it is noteworthy that the present study clearly showed a change  
51  
52 of the 9p21 susceptibility risk to AMI between before and after the first onset of AMI in  
53  
54 the same population. In the present study, the results showed that the rs1333049 C allele  
55  
56  
57  
58  
59  
60

1  
2  
3  
4  
5  
6 was associated with onset of the first AMI (OR 1.20, 95% CI 1.09-1.33,  $p=2.3 \times 10^{-4}$ ),  
7  
8  
9 which was consistent with the results of several previous studies in the primary  
10  
11 prevention settings.<sup>3-8</sup> Interestingly, however, the present study also demonstrated that  
12  
13 patients with the CC genotype had a lower incidence of 1-year ReMI (adjusted HR, 0.20,  
14  
15 95% CI 0.06-0.65,  $p=0.007$ ) as a novel finding. **These observations** suggested that the  
16  
17 risk of 9p21 variant seen in the primary prevention setting of the present study  
18  
19 population was modified in the secondary prevention setting. **Although it is speculative,**  
20  
21 **it is considered that modification of genetic risk of rs1333049 C allele might have**  
22  
23 **unmasked the risk of rs1333049 G allele in the secondary prevention setting**  
24  
25 **(Supplementary Figure 2).** However, it should be discussed why the 9p21 rs1333049  
26  
27 CC genotype was associated with reduced incidence of ReMI in the present study, while  
28  
29 not in the previous 3 studies.<sup>12-14</sup> One possible explanation for this discrepancy between  
30  
31 the previous and our studies is that we only include post-AMI patient who were treated  
32  
33 with emergent PCI on admission and survived to discharge, whereas all previous studies  
34  
35 included all of the patients hospitalized for AMI or ACS and thus include ReMI during  
36  
37 the acute stage of ACS as an endpoint. Considering that ReMI occurring during the  
38  
39 acute stage of ACS was likely associated with **lesion-** or procedure-related backgrounds  
40  
41 such as re-occlusion of the culprit lesion due to thrombus or mechanical acute closures  
42  
43  
44  
45  
46  
47  
48  
49  
50  
51  
52  
53  
54  
55  
56  
57  
58  
59  
60

1  
2  
3  
4  
5  
6 rather than genetic background, inclusion of these ReMI might have made the  
7  
8 interpretation of the results difficult in the previous studies. In addition, the patient  
9  
10 selection limited to those treated with primary PCI for the first AMI in the present study  
11  
12 might have clearly elucidated the 9p21-related susceptibility to ReMI in the secondary  
13  
14 prevention cohort.  
15  
16  
17  
18  
19

20  
21 The 9p21 locus is adjacent to the tumor suppressor genes CDKN2A and CDKN2B.<sup>8</sup>  
22  
23 Although the mechanism by which variation in the 9p21 locus increases AMI  
24  
25 susceptibility in the primary prevention setting remains unclear,<sup>8</sup> the evidence-based  
26  
27 secondary prevention programs might have masked the susceptibility risk of the 9p21  
28  
29 rs1333049 C allele to ReMI after ACS in the present study (Figure 2), possibly via  
30  
31 stabilizing coronary plaques.<sup>9-14,22-23</sup> Indeed, Do et al. reported that the impact of 9p21  
32  
33 genetic variation can be modified by increasing the dietary intake of vegetables,<sup>24</sup>  
34  
35 suggesting a role of secondary prevention programs including dietary practice. Thus,  
36  
37 further studies are warranted to investigate whether and how the secondary prevention  
38  
39 programs with evidence-based medication and lifestyle modification can reduce the risk  
40  
41 of ReMI in patients with 9p21 genetic variants in the near future. In particular, the  
42  
43 potential interaction of the rs1333049 SNP with secondary prevention medications  
44  
45 warrants further investigation, because gene-drug interactions have already been  
46  
47  
48  
49  
50  
51  
52  
53  
54  
55  
56  
57  
58  
59  
60

1  
2  
3  
4  
5  
6 detected in cardiovascular patients treated with warfarin, clopidogrel, and statin.<sup>25-27</sup>  
7  
8

9 The present study has several limitations that warrant mention. First, because our  
10 study population only consisted of patients who provided written informed consent at  
11 survival discharge, there may have been selection bias as well as survival bias since high  
12 risk patients carrying C allele might have died more frequently than patients with GG  
13 genotype during hospitalization. Second, [the number of recurrent myocardial infarction](#)  
14 [was relatively small and our study lacked a replication cohort to validate our](#)  
15 [observations. Therefore, replication studies with a larger sample are warranted to](#)  
16 [confirm our observations. However, it is often difficult to have a validation cohort in a](#)  
17 [prospective observational study design.](#)<sup>28</sup> Indeed, all studies presented in Table 2 did not  
18 include a replication cohort. Third, therapeutic regimen of AMI such as of coronary  
19 stenting and dual-antiplatelet therapy advanced and varied across the [study period](#). Forth,  
20 data regarding the mechanism and culprit lesion of ReMI were not available. Since  
21 ReMI can occur through a variety of mechanisms such as acute stent thrombosis of  
22 culprit lesion, excessive intimal proliferation of stented vessels, and plaque rupture of  
23 new atherosclerotic lesion, detailed analysis for the mechanism of ReMI is ideal. [Fifth,](#)  
24 [patient backgrounds and primary preventive medications were not adjusted in the](#)  
25 [case-control association study in the primary prevention setting.](#) Finally, it is possible  
26  
27  
28  
29  
30  
31  
32  
33  
34  
35  
36  
37  
38  
39  
40  
41  
42  
43  
44  
45  
46  
47  
48  
49  
50  
51  
52  
53  
54  
55  
56  
57  
58  
59  
60

1  
2  
3  
4  
5  
6 that unmeasured confounding factors influenced the study outcomes due to the inherent  
7  
8  
9 nature of observational registry. The data should be interpreted within the context of  
10  
11  
12 these potential limitations.

### 13 14 15 16 17 18 **Conclusions**

19  
20 We demonstrated that homozygous carriers of AMI susceptibility variant rs1333049  
21  
22  
23 SNP C allele on chromosome 9p21 showed a reduced risk of 1-year ReMI after survival  
24  
25  
26 discharge, suggesting a modification of genetic susceptibility of AMI with secondary  
27  
28  
29 prevention programs.  
30  
31  
32  
33  
34

### 35 36 37 **Acknowledgements**

38 We thank Mariko Kishida, Rie Nagai, Nanase Muraoka, Hiroko Takemori, Akiko  
39  
40 Yamagishi, Kumiko Miyoshi, Chizuru Hamaguchi, Hiroko Machida, Mariko Yoneda,  
41  
42  
43 Nagisa Yoshioka, Mayuko Tomatsu, Kyoko Tatsumi, Tomoko Mizuoka, Shigemi  
44  
45  
46 Kohara, Junko Tsugawa, Junko Isotani, Sachiko Ashibe, and all other OACIS research  
47  
48  
49 coordinators and nurses for their excellent assistance with data collection.  
50  
51  
52  
53  
54

### 55 56 57 **Contributors**

58  
59  
60

1  
2  
3  
4  
5  
6 All authors (MH, YS, DN, SS, MU, SM, KO, MN, HS, TK, SN, TH, TT, MH, and IK)  
7  
8  
9 participated in the study conception and design, acquisition of data, analysis and  
10  
11 interpretation of data, drafting the article and revising it critically for important  
12  
13 intellectual content, and final approval of the manuscript.  
14  
15  
16  
17  
18  
19

### 20 **Funding**

21  
22 This work was supported by Grants-in-Aid for University and Society Collaboration  
23  
24 (#19590816 and #19390215) from the Japanese Ministry of Education, Culture, Sports,  
25  
26 Science and Technology, Tokyo, Japan.  
27  
28  
29  
30  
31  
32  
33  
34

### 35 **Competing interests**

36  
37 Dr. Komuro has received research grants and speaker's fees from Takeda  
38  
39 Pharmaceutical Company, Astellas Pharma, DAIICHI SANKYO COMPANY,  
40  
41 Boehringer Ingelheim, Novartis Pharma and Shionogi. No other authors have  
42  
43 relationships with industry to disclose or financial associations that might pose a  
44  
45 conflict of interest in connection with the submitted article.  
46  
47  
48  
49  
50  
51  
52  
53  
54

### 55 **Ethics approval**

1  
2  
3  
4  
5  
6 The study protocol complied with the Helsinki Declaration and the guidelines for  
7  
8  
9 genomic/genetic research issued by the Japanese government. The study was approved  
10  
11  
12 by the institutional ethical committee of each participating institution.  
13

#### 14 15 16 17 18 **Patient consent**

19  
20 Obtained.  
21  
22

#### 23 24 25 26 **Provenance and peer review**

27  
28  
29 Not commissioned; externally peer reviewed.  
30  
31  
32

#### 33 34 35 **Data sharing statement**

36  
37  
38 [No additional data available.](#)  
39  
40  
41  
42

#### 43 44 **Open Access**

45  
46 This is an Open Access article distributed in accordance with the Creative Commons  
47  
48 Attribution Non Commercial (CC BY-NC 3.0) license, which permits others to  
49  
50 distribute, remix, adapt, build upon this work noncommercially, and license their  
51  
52 derivative works on different terms, provided the original work is properly cited and the  
53  
54  
55  
56  
57  
58  
59  
60



1  
2  
3  
4  
5  
6  
7  
8  
9  
10  
11  
12  
13  
14  
15  
16  
17  
18  
19  
20  
21  
22  
23  
24  
25  
26  
27  
28  
29  
30  
31  
32  
33  
34  
35  
36  
37  
38  
39  
40  
41  
42  
43  
44  
45  
46  
47  
48  
49  
50  
51  
52  
53  
54  
55  
56  
57  
58  
59  
60

use is non-commercial. See: <http://creativecommons.org/licenses/by-nc/3.0/>

For peer review only

## References

1. White HD, Chew DP. Acute myocardial infarction. *Lancet* 2008;372:570-584.
2. Marenberg ME, Risch N, Berkman LF, et al. Genetic susceptibility to death from coronary heart disease in a study of twins. *N Engl J Med* 1994;330:1041-1046.
3. Samani NJ, Erdmann J, Hall AS, et al; WTCCC and the Cardiogenics Consortium. Genomewide association analysis of coronary artery disease. *N Engl J Med* 2007;357:443-453.
4. McPherson R, Pertsemlidis A, Kavaslar N, et al. A common allele on chromosome 9 associated with coronary heart disease. *Science* 2007;316:1488-1491.
5. Helgadóttir A, Thorleifsson G, Manolescu A, et al. A common variant on chromosome 9p21 affects the risk of myocardial infarction. *Science* 2007;316:1491-1493.
6. Myocardial Infarction Genetics Consortium, Kathiresan S, Voight BF, Purcell S, et al. Genome-wide association of early-onset myocardial infarction with single nucleotide polymorphisms and copy number variants. *Nat Genet* 2009;41:334-341.
7. Schunkert H, König IR, Kathiresan S, et al; CARDIoGRAM Consortium. Large-scale association analysis identifies 13 new susceptibility loci for coronary artery disease. *Nat Genet* 2011;43:333-338.

- 1  
2  
3  
4  
5  
6 8. Schunkert H, Götz A, Braund P, et al; Cardiogenics Consortium. Repeated  
7  
8  
9 replication and a prospective meta-analysis of the association between chromosome  
10  
11 9p21.3 and coronary artery disease. *Circulation* 2008;117:1675-1684.  
12
- 13  
14 9. Horne BD, Carlquist JF, Muhlestein JB, et al. Association of variation in the  
15  
16 chromosome 9p21 locus with myocardial infarction versus chronic coronary artery  
17  
18 disease. *Circ Cardiovasc Genet* 2008;1:85-92.  
19  
20
- 21 10. Dandona S, Stewart AF, Chen L, et al. Gene dosage of the common variant 9p21  
22  
23 predicts severity of coronary artery disease. *J Am Coll Cardiol* 2010;56:479-486.  
24  
25
- 26 11. Chan K, Patel RS, Newcombe P, et al. Association between the chromosome 9p21  
27  
28 locus and angiographic coronary artery disease burden: a collaborative  
29  
30 meta-analysis. *J Am Coll Cardiol* 2013;61:957-970.  
31  
32
- 33 12. Buyschaert I, Carruthers KF, Dunbar DR, et al. A variant at chromosome 9p21 is  
34  
35 associated with recurrent myocardial infarction and cardiac death after acute  
36  
37 coronary syndrome: the GRACE Genetics Study. *Eur Heart J* 2010;31:1132-1141.  
38  
39
- 40 13. Ardissino D, Berzuini C, Merlini PA, et al; Italian Atherosclerosis, Thrombosis and  
41  
42 Vascular Biology Investigators. Influence of 9p21.3 genetic variants on clinical and  
43  
44 angiographic outcomes in early-onset myocardial infarction. *J Am Coll Cardiol*  
45  
46 2011;58:426-434.  
47  
48  
49  
50  
51  
52  
53  
54  
55  
56  
57  
58  
59  
60

- 1  
2  
3  
4  
5  
6 14. Virani SS, Brautbar A, Lee VV, et al. Chromosome 9p21 single nucleotide  
7  
8 polymorphisms are not associated with recurrent myocardial infarction in patients  
9  
10 with established coronary artery disease. *Circ J* 2012;76:950-956.  
11  
12  
13  
14 15. Hara M, Sakata Y, Nakatani D, et al; Osaka Acute Coronary Insufficiency Study  
15  
16 (OACIS) Investigators. Low levels of serum n-3 polyunsaturated fatty acids are  
17  
18 associated with worse heart failure-free survival in patients after acute myocardial  
19  
20 infarction. *Circ J* 2013;1:153-162.  
21  
22  
23  
24 25. Nakatani D, Sakata Y, Suna S, et al; Osaka Acute Coronary Insufficiency Study  
26  
27 (OACIS) Investigators. Impact of beta blockade therapy on long-term mortality after  
28  
29 ST-segment elevation acute myocardial infarction in the percutaneous coronary  
30  
31 intervention era. *Am J Cardiol* 2013;111:457-464.  
32  
33  
34  
35 36. Matsumoto S, Nakatani D, Sakata Y, et al; Osaka Acute Coronary Insufficiency  
37  
38 Study (OACIS) Group. Elevated serum heart-type fatty acid-binding protein in the  
39  
40 convalescent stage predicts long-term outcome in patients surviving acute  
41  
42 myocardial infarction. *Circ J* 2013;77:1026-1032.  
43  
44  
45  
46 47. Kitamura T, Sakata Y, Nakatani D, et al. Living alone and risk of cardiovascular  
48  
49 events following discharge after acute myocardial infarction in Japan. *J Cardiol*  
50  
51 2013;62:257-262.  
52  
53  
54  
55  
56  
57  
58  
59  
60

- 1  
2  
3  
4  
5  
6 19. Usami M, Sakata Y, Nakatani D, et al. Clinical impact of acute hyperglycemia on  
7  
8 development of diabetes mellitus in non-diabetic patients with acute myocardial  
9  
10 development of diabetes mellitus in non-diabetic patients with acute myocardial  
11  
12 infarction. *J Cardiol* 2013 [Epub ahead of print] (DOI: 10.1016/j.jjcc.2013.08.012.)  
13  
14  
15 20. No authors listed. Nomenclature and criteria for diagnosis of ischemic heart disease.  
16  
17 Report of the Joint International Society and Federation of Cardiology/World Health  
18  
19 Organization task force on standardization of clinical nomenclature. *Circulation*  
20  
21 1979;59:607-609  
22  
23  
24  
25  
26 21. Ohnishi Y, Tanaka T, Ozaki K, et al. A high-throughput SNP typing system for  
27  
28 genome-wide association studies. *J Hum Genet* 2001;46:471-477.  
29  
30  
31  
32 22. Kushner FG, Hand M, Smith SC Jr, et al; American College of Cardiology  
33  
34 Foundation/American Heart Association Task Force on Practice Guidelines. 2009  
35  
36 Focused Updates: ACC/AHA Guidelines for the Management of Patients With  
37  
38 ST-Elevation Myocardial Infarction (updating the 2004 Guideline and 2007 Focused  
39  
40 Update) and ACC/AHA/SCAI Guidelines on Percutaneous Coronary Intervention  
41  
42 (updating the 2005 Guideline and 2007 Focused Update): a report of the American  
43  
44 College of Cardiology Foundation/American Heart Association Task Force on  
45  
46 Practice Guidelines. *Circulation* 2009;120:2271-2306.  
47  
48  
49  
50  
51  
52  
53  
54  
55  
56  
57  
58  
59  
60

- 1  
2  
3  
4  
5  
6 23. Tsunoda R, Sakamoto T, Kojima S, et al. Recurrence of angina pectoris after  
7  
8 percutaneous coronary intervention is reduced by statins in Japanese patients. *J*  
9  
10 *Cardiol* 2011;58:208-215.  
11  
12
- 13  
14 24. Do R, Xie C, Zhang X, et al; INTERHEART investigators. The effect of  
15  
16 chromosome 9p21 variants on cardiovascular disease may be modified by dietary  
17  
18 intake: evidence from a case/control and a prospective study. *PLoS Med*  
19  
20 2011;8:e1001106. (DOI 10.1371, last accessed November 11, 2013)  
21  
22  
23  
24
- 25  
26 25. International Warfarin Pharmacogenetics Consortium, Klein TE, Altman RB,  
27  
28 Eriksson N, et al. Estimation of the warfarin dose with clinical and pharmacogenetic  
29  
30 data. *N Engl J Med* 2009;360:753-764.  
31  
32  
33  
34
- 35 26. Simon T, Verstuyft C, Mary-Krause M, et al; French Registry of Acute ST-Elevation  
36  
37 and Non-ST-Elevation Myocardial Infarction (FAST-MI) Investigators. Genetic  
38  
39 determinants of response to clopidogrel and cardiovascular events. *N Engl J Med*  
40  
41 2009;360:363-375.  
42  
43  
44  
45
- 46 27. SEARCH Collaborative Group, Link E, Parish S, Armitage J, et al. SLCO1B1  
47  
48 variants and statin-induced myopathy--a genomewide study. *N Engl J Med*  
49  
50 2008;359:789-799.  
51  
52  
53  
54
- 55 28. Ginsburg GS, Shah SH, McCarthy JJ. Taking cardiovascular genetic association  
56  
57  
58  
59  
60

1  
2  
3  
4  
5  
6  
7  
8  
9  
10  
11  
12  
13  
14  
15  
16  
17  
18  
19  
20  
21  
22  
23  
24  
25  
26  
27  
28  
29  
30  
31  
32  
33  
34  
35  
36  
37  
38  
39  
40  
41  
42  
43  
44  
45  
46  
47  
48  
49  
50  
51  
52  
53  
54  
55  
56  
57  
58  
59  
60

studies to the next level. *J Am Coll Cardiol* 2007;50:930-932.

For peer review only

Table 1. Patient Background Based on rs1333049 Genotype

| Parameter               | Overall<br>(n=2022) | CC<br>(n=574)       | CG<br>(n=997)       | GG<br>(n=451)       | p-value |
|-------------------------|---------------------|---------------------|---------------------|---------------------|---------|
| Age, years              | 65 (57-73)          | 65 (57-73)          | 65 (57-73)          | 65 (58-73)          | 0.986   |
| Male, %                 | 76.8                | 78.6                | 75.2                | 77.8                | 0.265   |
| BMI, kg/m <sup>2</sup>  | 23.8<br>(21.9-25.9) | 23.9<br>(21.8-25.7) | 23.7<br>(21.8-25.8) | 23.8<br>(22.0-26.0) | 0.653   |
| STEMI, %                | 87.7                | 88.1                | 86.6                | 89.6                | 0.272   |
| Coronary risk factor    |                     |                     |                     |                     |         |
| Diabetes, %             | 31.6                | 33.0                | 29.7                | 33.7                | 0.227   |
| Hypertension, %         | 60.1                | 61.0                | 59.5                | 60.3                | 0.829   |
| Dyslipidemia, %         | 46.5                | 43.8                | 47.2                | 48.5                | 0.267   |
| Smoking, %              | 64.3                | 63.6                | 64.4                | 65.2                | 0.868   |
| CAG Findings            |                     |                     |                     |                     |         |
| Target lesion           |                     |                     |                     |                     | 0.153   |
| Left main trunk, %      | 1.0                 | 1.0                 | 1.0                 | 1.1                 |         |
| LAD, %                  | 45.1                | 43.2                | 43.7                | 50.3                |         |
| Diagonal branch, %      | 2.9                 | 3.0                 | 2.7                 | 3.1                 |         |
| RCA, %                  | 35.8                | 37.3                | 35.6                | 34.4                |         |
| LCx, %                  | 14.7                | 14.8                | 16.5                | 10.6                |         |
| Graft, %                | 0.1                 | 0.3                 | 0.0                 | 0.0                 |         |
| Unkown, %               | 0.4                 | 0.3                 | 0.4                 | 0.4                 |         |
| Stenting, %             | 88.8                | 90.1                | 87.6                | 90.0                | 0.207   |
| Multivessel disease, %  | 40.2                | 38.6                | 40.1                | 42.4                | 0.473   |
| Peak CPK, IU/L          | 2269<br>(1027-4006) | 2304<br>(1005-4087) | 2242<br>(1026-4041) | 2345<br>(1104-3882) | 0.898   |
| Medication at discharge |                     |                     |                     |                     |         |
| ACEI, %                 | 44.6                | 46.2                | 44.2                | 43.5                | 0.650   |
| ARB, %                  | 40.4                | 38.2                | 41.4                | 41.0                | 0.425   |
| Beta-blocker, %         | 62.0                | 59.9                | 62.5                | 63.4                | 0.466   |
| Calcium-blocker, %      | 13.5                | 13.2                | 13.2                | 14.4                | 0.814   |
| Statin, %               | 53.5                | 50.7                | 54.1                | 55.7                | 0.249   |
| Diuretics, %            | 24.7                | 22.6                | 26.0                | 24.4                | 0.333   |
| Dual anti-platelet, %   | 80.8                | 80.8                | 80.6                | 80.9                | 0.990   |



1  
2  
3  
4  
5  
6 Categorical variables are presented as percentage and continuous variables are presented  
7  
8  
9 as the median (25-75 percentiles). ACEI, angiotensin-converting enzyme inhibitor; ARB,  
10  
11 angiotensin receptor blocker; BMI, body mass index; CAG, coronary angiography; CPK,  
12  
13 creatine phosphokinase; LAD, left anterior descending artery; LCx, left circumflex  
14  
15 artery; RCA, right coronary artery; and STEMI, ST-elevation myocardial infarction.  
16  
17  
18  
19  
20  
21  
22  
23  
24  
25  
26  
27  
28  
29  
30  
31  
32  
33  
34  
35  
36  
37  
38  
39  
40  
41  
42  
43  
44  
45  
46  
47  
48  
49  
50  
51  
52  
53  
54  
55  
56  
57  
58  
59  
60

Table 2. Summary of studies examining the association between 9p21 variants and re-myocardial infarction events after acute coronary syndrome

|                    | OACIS Registry                                         | GRACE Genetic study                                    | Italian Genetic study             | TexGen Registry                   |
|--------------------|--------------------------------------------------------|--------------------------------------------------------|-----------------------------------|-----------------------------------|
| Reference          | —                                                      | 12                                                     | 13                                | 14                                |
| Year               | —                                                      | 2010                                                   | 2011                              | 2012                              |
| SNP                | rs1333049                                              | rs1333049                                              | rs1333040                         | rs1333049                         |
| Pt number          | 2,022                                                  | 2,942                                                  | 1,508                             | 2,067                             |
| Design             | Prospective                                            | Prospective                                            | Prospective                       | Prospective                       |
| Follow-up          | 1 year                                                 | 6 months                                               | 9.95 years                        | 3.2 years                         |
| Population         | Japan                                                  | UK, Belgium, Poland                                    | Italy                             | USA                               |
| Background disease | MI (STEMI 87.7%, non-STEMI 12.3%)                      | ACS (STEMI 27.2%, non-STEMI 43.3%, UA 29.5%)           | Early-onset MI                    | ACS (fraction unknown)            |
| PCI                | 100%                                                   | 47.5%                                                  | 0%                                | 63.6%                             |
| End-point          | ReMI after survival discharge                          | ReMI including in-hospital events                      | ReMI including in-hospital events | ReMI including in-hospital events |
| Conclusion         | Low event rate with homozygous carriers of risk allele | High event rate with risk allele carriers (univariate) | No association                    | No association                    |
| Replication        | None                                                   | None                                                   | None                              | None                              |

ACS, acute coronary syndrome; CAD, coronary artery disease; DES, drug-eluting stent;

MI, myocardial infarction; PCI, percutaneous coronary intervention; Pt, participants;

ReMI, recurrence of myocardial infarction; STEMI, ST-elevation myocardial infarction;

UA, unstable angina.

Supplementary Table 1. Results of univariate Cox regression analysis for re-myocardial infarction

| Parameter               | Hazard Ratio  | 95% CI        | p value     |
|-------------------------|---------------|---------------|-------------|
| Age                     | 0.984         | 0.958-1.009   | 0.206       |
| Male                    | 1.127         | 0.541-2.350   | 0.750       |
| BMI                     | 0.999         | 0.913-1.09    | 0.981       |
| STEMI                   | 1.388         | 0.496-3.883   | 0.533       |
| Coronary risk factor    |               |               |             |
| Diabetes                | 0.872         | 0.446-1.703   | 0.688       |
| Hypertension            | 0.843         | 0.462-1.539   | 0.578       |
| Dyslipidemia            | 0.622         | 0.331-1.168   | 0.140       |
| Smoking                 | 2.423         | 1.124-5.222   | 0.024       |
| Target lesion           |               |               |             |
| Left main trunk         | 2.533         | 0.337-19.034  | 0.366       |
| LAD                     | 1 (reference) | (reference)   | (reference) |
| Diagonal branch         | 0.892         | 0.119-6.706   | 0.912       |
| RCA                     | 1.434         | 0.745-2.758   | 0.281       |
| LCx                     | 0.902         | 0.333-2.446   | 0.840       |
| Graft                   | 0.000         | 0.000-Inf     | 0.998       |
| Multivessel disease     | 1.072         | 0.5851- 1.966 | 0.821       |
| Peak CPK                | 0.9999        | 0.9998-1.0000 | 0.365       |
| Medication at discharge |               |               |             |
| ACEI                    | 1.572         | 0.861-2.870   | 0.141       |
| ARB                     | 0.701         | 0.371-1.327   | 0.275       |
| Beta-blocker            | 0.641         | 0.352-1.165   | 0.144       |
| Calcium-blocker         | 0.630         | 0.225-1.764   | 0.380       |
| Statin                  | 0.617         | 0.337-1.130   | 0.118       |
| Diuretics               | 0.712         | 0.331-1.536   | 0.387       |
| Dual anti-platelet      | 1.794         | 0.706-4.558   | 0.219       |

Abbreviations are same as in Table 1.

1  
2  
3  
4  
5  
6 Figure Legends  
7  
8  
9  
10

11  
12 Figure 1. Patient selection flow chart. AMI, acute myocardial infarction; DNA,  
13 deoxyribonucleic acid; MI, myocardial infarction; OACIS, Osaka Acute Coronary  
14 Insufficiency Study; and PCI, percutaneous coronary intervention.  
15  
16  
17  
18  
19

20  
21  
22  
23  
24  
25  
26 Figure 2. Kaplan-Meier estimates of re-myocardial infarction event.  
27  
28  
29  
30  
31  
32  
33  
34

35 Figure 3. Impact of the rs1333049 genotype on the onset and 1-year re-myocardial  
36 infarction. AMI, acute myocardial infarction; CI, confidence interval; HR, hazard ratio  
37 (CC vs CG/GG); OR, odds ratio (C vs G per allele); and ReMI, re-myocardial  
38  
39  
40  
41  
42  
43  
44  
45  
46  
47  
48  
49  
50  
51  
52  
53  
54  
55  
56  
57  
58  
59  
60

59  
60 Figure 4. Subgroup analysis of the impact of rs1333049 genotype on 1-year  
re-myocardial infarction rate. ACEI, angiotensin-converting enzyme inhibitor; ARB,

1  
2  
3  
4  
5  
6 angiotensin receptor blocker; CI, confidence interval; DAPT, dual anti-platelet therapy;  
7  
8  
9 HR, hazard ratio; NA, not assessed due to insufficient number of events in the subgroup  
10  
11  
12 analysis; and STEMI, ST-elevation myocardial infarction.  
13

14  
15  
16  
17  
18  
19  
20  
21 Supplementary Figure 1. Linkage disequilibrium of chromosome 9p21 single nucleotide  
22  
23 polymorphisms in the present study population. Linkage disequilibrium was evaluated  
24  
25  
26 by D prime (left) and R squared (right) using PLINK and Haploview softwares.  
27  
28  
29  
30  
31  
32  
33  
34

35  
36 Supplementary Figure 2. A possible mechanism for the differential impact of rs1333049  
37  
38 genotypes between the primary and secondary prevention settings. (A) Risk of first  
39  
40 acute myocardial infarction (AMI) in the primary prevention setting. (B) Risk of  
41  
42 re-myocardial infarction (ReMI) in the secondary prevention setting. Blue and yellow  
43  
44 bars indicate the susceptibility risks of G (dominant risk) and C (additive risk) alleles,  
45  
46  
47 respectively. In this model, it is assumed that the risk of rs1333049 G allele was not  
48  
49  
50 changed between primary and secondary prevention settings, while the risk of  
51  
52  
53 rs1333049 C allele was reduced by the secondary prevention programs after AMI. In the  
54  
55  
56  
57  
58  
59  
60

1  
2  
3  
4  
5  
6 primary prevention setting (panel A), the risk of C allele overwhelmed the G allele risk,  
7  
8  
9 making an “additive risk model” of C allele, in which the total risk increased as the  
10  
11  
12 number of C allele increased. On the other hand, in the secondary prevention setting  
13  
14  
15 (panel B), the risk of rs1333049 C allele was reduced and then the risk of G allele  
16  
17  
18 became highlighted, making a so-called “dominant risk model” of rs1333049 G allele.  
19  
20  
21  
22  
23  
24  
25  
26  
27  
28  
29  
30  
31  
32  
33  
34  
35  
36  
37  
38  
39  
40  
41  
42  
43  
44  
45  
46  
47  
48  
49  
50  
51  
52  
53  
54  
55  
56  
57  
58  
59  
60

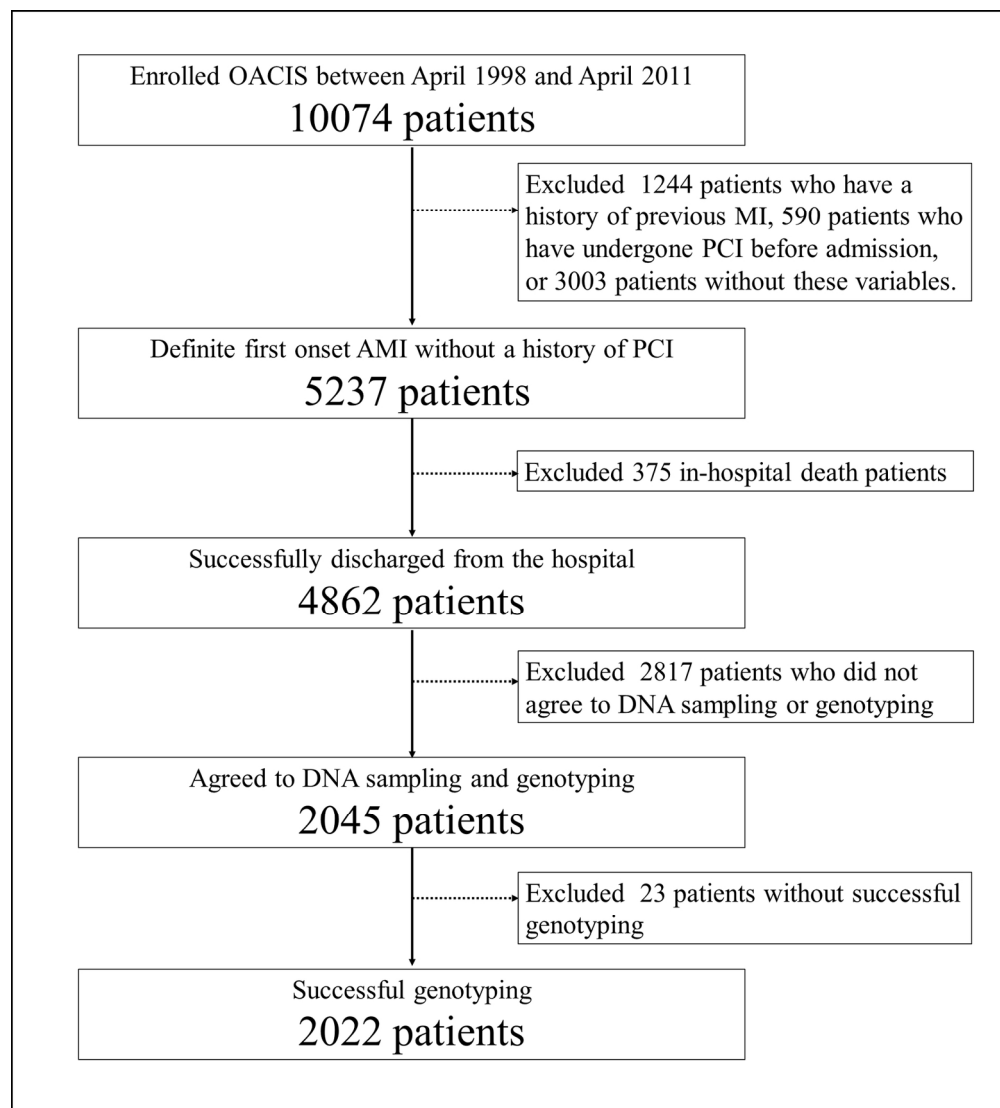

43 Patient selection flow chart. AMI, acute myocardial infarction; DNA, deoxyribonucleic acid; MI, myocardial  
44 infarction; OACIS, Osaka Acute Coronary Insufficiency Study; and PCI, percutaneous coronary intervention.  
45 162x179mm (300 x 300 DPI)

1  
2  
3  
4  
5  
6  
7  
8  
9  
10  
11  
12  
13  
14  
15  
16  
17  
18  
19  
20  
21  
22  
23  
24  
25  
26  
27  
28  
29  
30  
31  
32  
33  
34  
35  
36  
37  
38  
39  
40  
41  
42  
43  
44  
45  
46  
47  
48  
49  
50  
51  
52  
53  
54  
55  
56  
57  
58  
59  
60

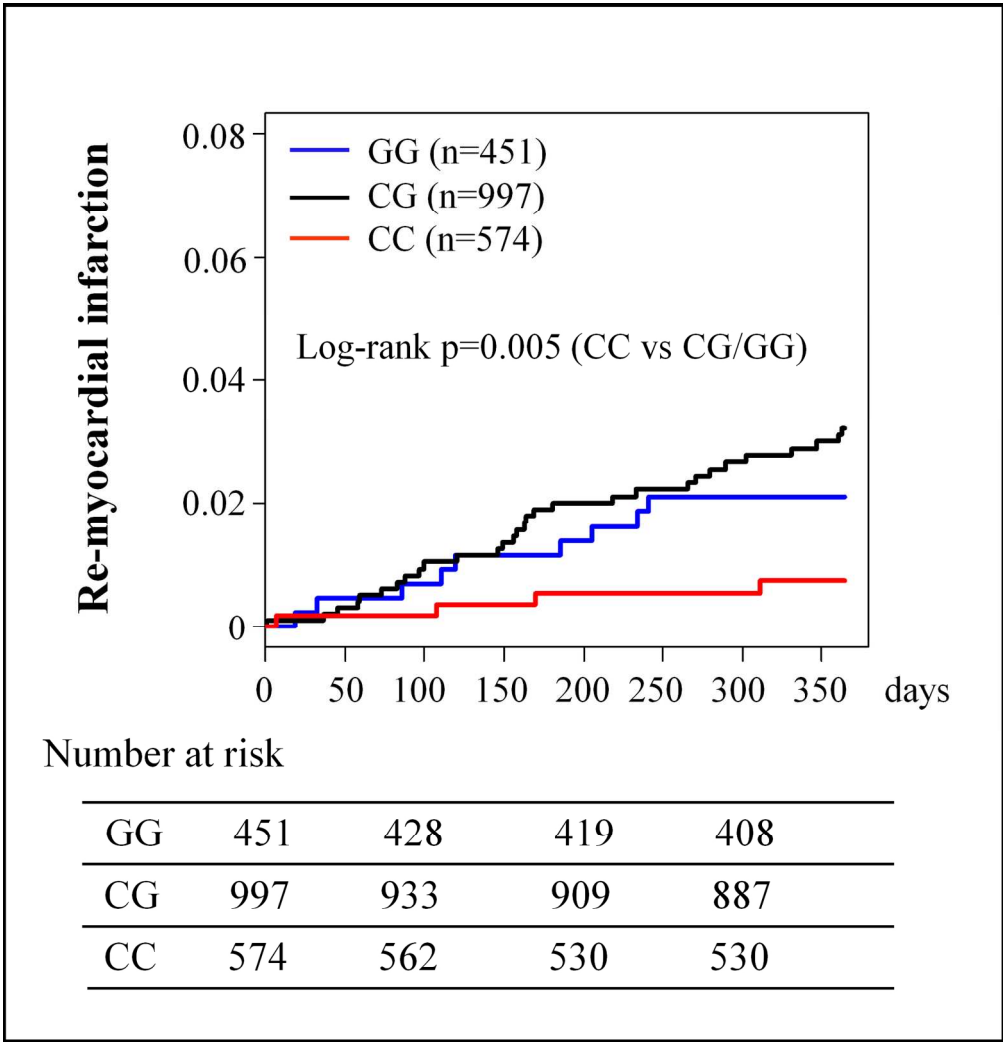

Kaplan-Meier estimates of re-myocardial infarction event.  
172x178mm (300 x 300 DPI)

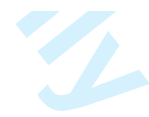



1  
2  
3  
4  
5  
6  
7  
8  
9  
10  
11  
12  
13  
14  
15  
16  
17  
18  
19  
20  
21  
22  
23  
24  
25  
26  
27  
28  
29  
30  
31  
32  
33  
34  
35  
36  
37  
38  
39  
40  
41  
42  
43  
44  
45  
46  
47  
48  
49  
50  
51  
52  
53  
54  
55  
56  
57  
58  
59  
60

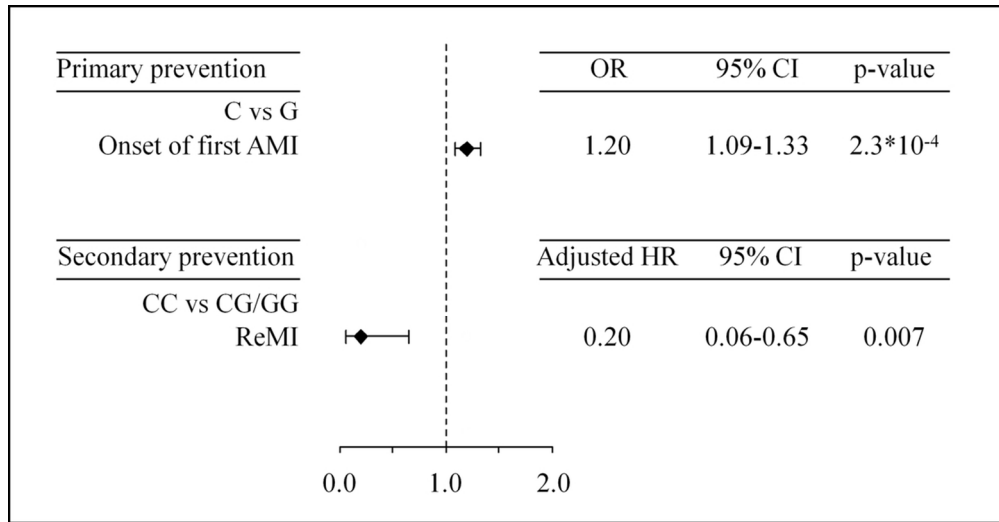

Impact of the rs1333049 genotype on the onset and 1-year re-myocardial infarction. AMI, acute myocardial infarction; CI, confidence interval; HR, hazard ratio (CC vs CG/GG); OR, odds ratio (C vs G per allele); and ReMI, re-myocardial infarction.  
103x53mm (300 x 300 DPI)

review only

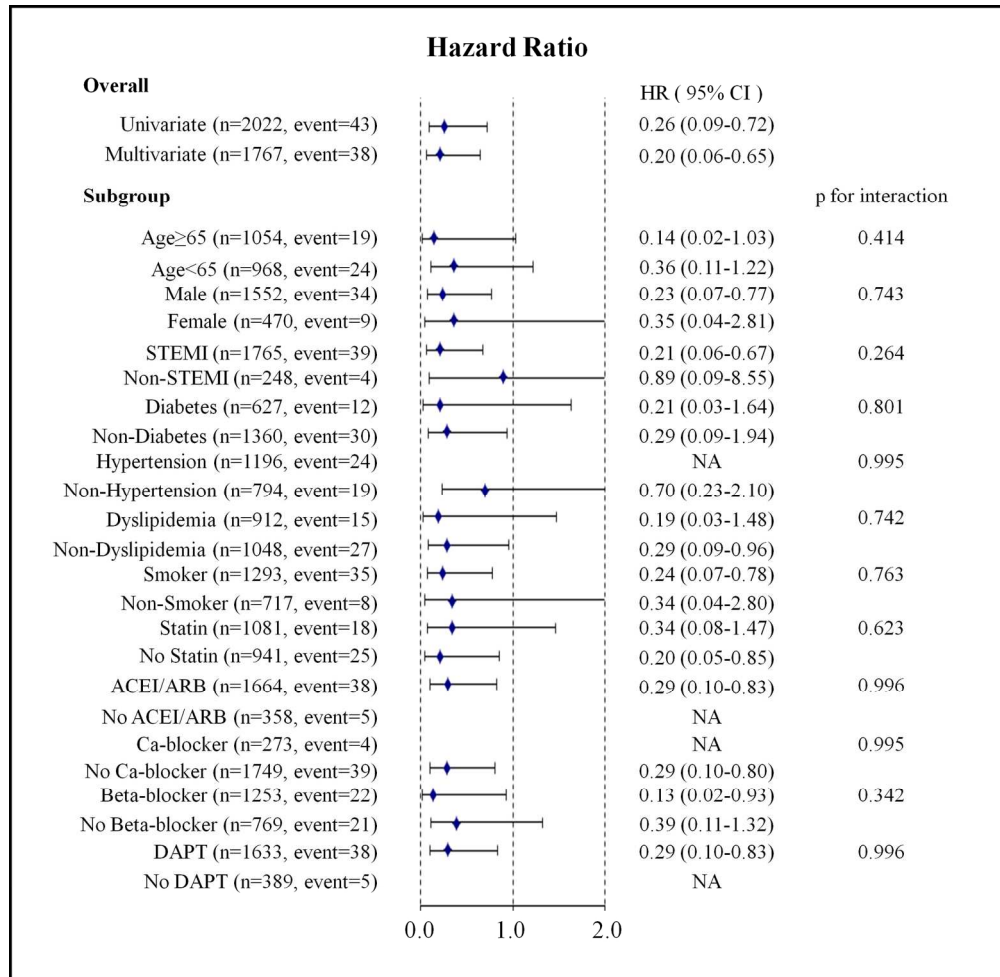

Subgroup analysis of the impact of rs1333049 genotype on 1-year re-myocardial infarction rate. ACEI, angiotensin-converting enzyme inhibitor; ARB, angiotensin receptor blocker; CI, confidence interval; DAPT, dual anti-platelet therapy; HR, hazard ratio; NA, not assessed due to insufficient number of events in the subgroup analysis; and STEMI, ST-elevation myocardial infarction.

170x166mm (300 x 300 DPI)

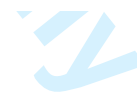

Supplementary Table 1. Results of univariate Cox regression analysis for re-myocardial infarction

| Parameter               | Hazard Ratio  | 95% CI        | p value     |
|-------------------------|---------------|---------------|-------------|
| Age                     | 0.984         | 0.958-1.009   | 0.206       |
| Male                    | 1.127         | 0.541-2.350   | 0.750       |
| BMI                     | 0.999         | 0.913-1.09    | 0.981       |
| STEMI                   | 1.388         | 0.496-3.883   | 0.533       |
| Coronary risk factor    |               |               |             |
| Diabetes                | 0.872         | 0.446-1.703   | 0.688       |
| Hypertension            | 0.843         | 0.462-1.539   | 0.578       |
| Dyslipidemia            | 0.622         | 0.331-1.168   | 0.140       |
| Smoking                 | 2.423         | 1.124-5.222   | 0.024       |
| Target lesion           |               |               |             |
| Left main trunk         | 2.533         | 0.337-19.034  | 0.366       |
| LAD                     | 1 (reference) | (reference)   | (reference) |
| Diagonal branch         | 0.892         | 0.119-6.706   | 0.912       |
| RCA                     | 1.434         | 0.745-2.758   | 0.281       |
| LCx                     | 0.902         | 0.333-2.446   | 0.840       |
| Graft                   | 0.000         | 0.000-Inf     | 0.998       |
| Multivessel disease     | 1.072         | 0.5851- 1.966 | 0.821       |
| Peak CPK                | 0.9999        | 0.9998-1.0000 | 0.365       |
| Medication at discharge |               |               |             |
| ACEI                    | 1.572         | 0.861-2.870   | 0.141       |
| ARB                     | 0.701         | 0.371-1.327   | 0.275       |
| Beta-blocker            | 0.641         | 0.352-1.165   | 0.144       |
| Calcium-blocker         | 0.630         | 0.225-1.764   | 0.380       |
| Statin                  | 0.617         | 0.337-1.130   | 0.118       |
| Diuretics               | 0.712         | 0.331-1.536   | 0.387       |
| Dual anti-platelet      | 1.794         | 0.706-4.558   | 0.219       |

Abbreviations are same as in Table 1.

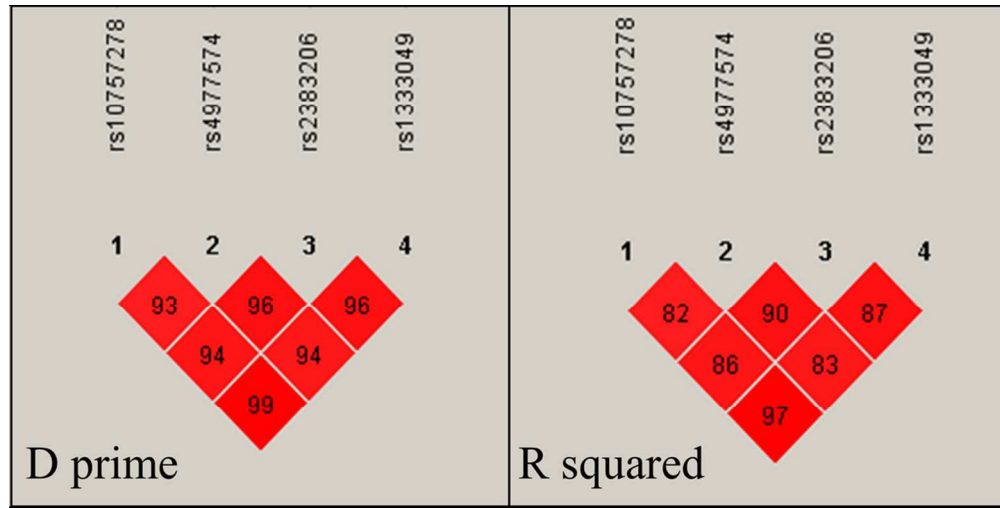

Linkage disequilibrium of chromosome 9p21 single nucleotide polymorphisms in the present study population. Linkage disequilibrium was evaluated by D prime (left) and R squared (right) using PLINK and Haploview softwares.  
98x49mm (300 x 300 DPI)

review only

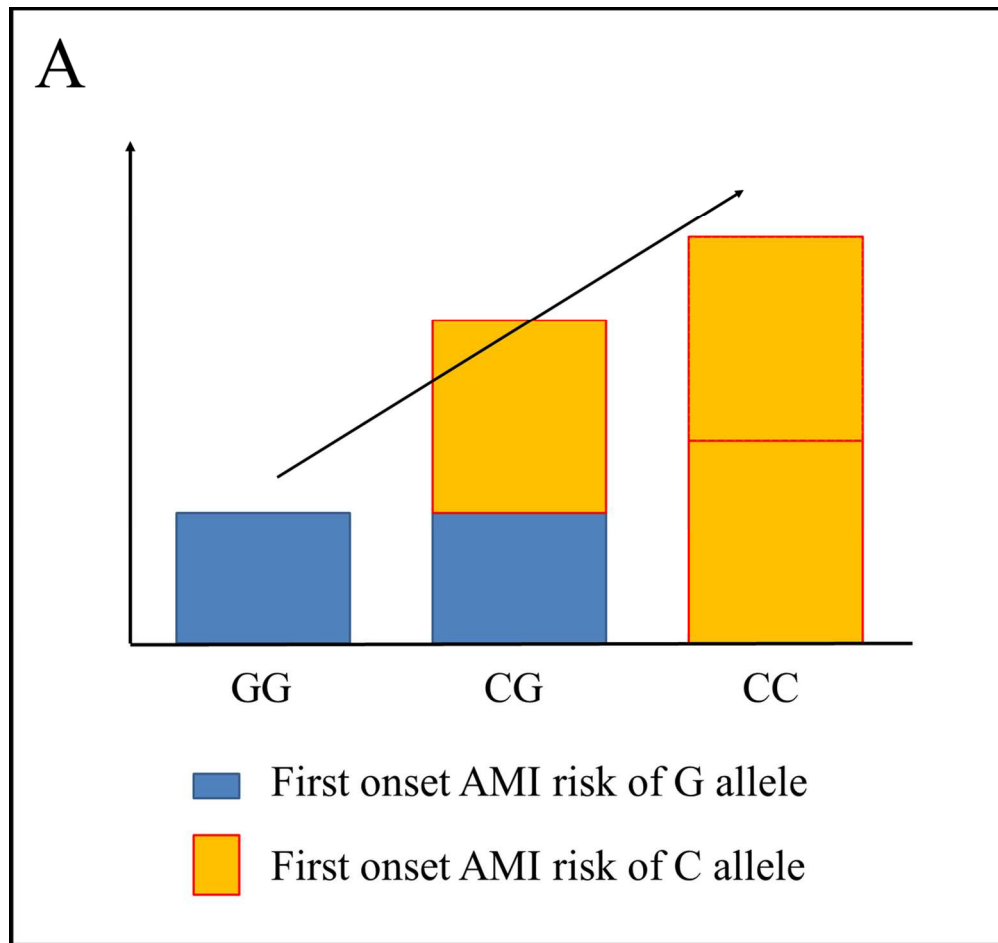

38  
39  
40  
41  
42  
43  
44  
45  
46  
47  
48

A possible mechanism for the differential impact of rs1333049 genotypes between the primary and secondary prevention settings. (A) Risk of first acute myocardial infarction (AMI) in the primary prevention setting. (B) Risk of re-myocardial infarction (ReMI) in the secondary prevention setting. Blue and yellow bars indicate the susceptibility risks of G (dominant risk) and C (additive risk) alleles, respectively. In this model, it is assumed that the risk of rs1333049 G allele was not changed between primary and secondary prevention settings, while the risk of rs1333049 C allele was reduced by the secondary prevention programs after AMI. In the primary prevention setting (panel A), the risk of C allele overwhelmed the G allele risk, making an "additive risk model" of C allele, in which the total risk increased as the number of C allele increased. On the other hand, in the secondary prevention setting (panel B), the risk of rs1333049 C allele was reduced and then the risk of G allele became highlighted, making a so-called "dominant risk model" of rs1333049 G allele.

119x112mm (300 x 300 DPI)

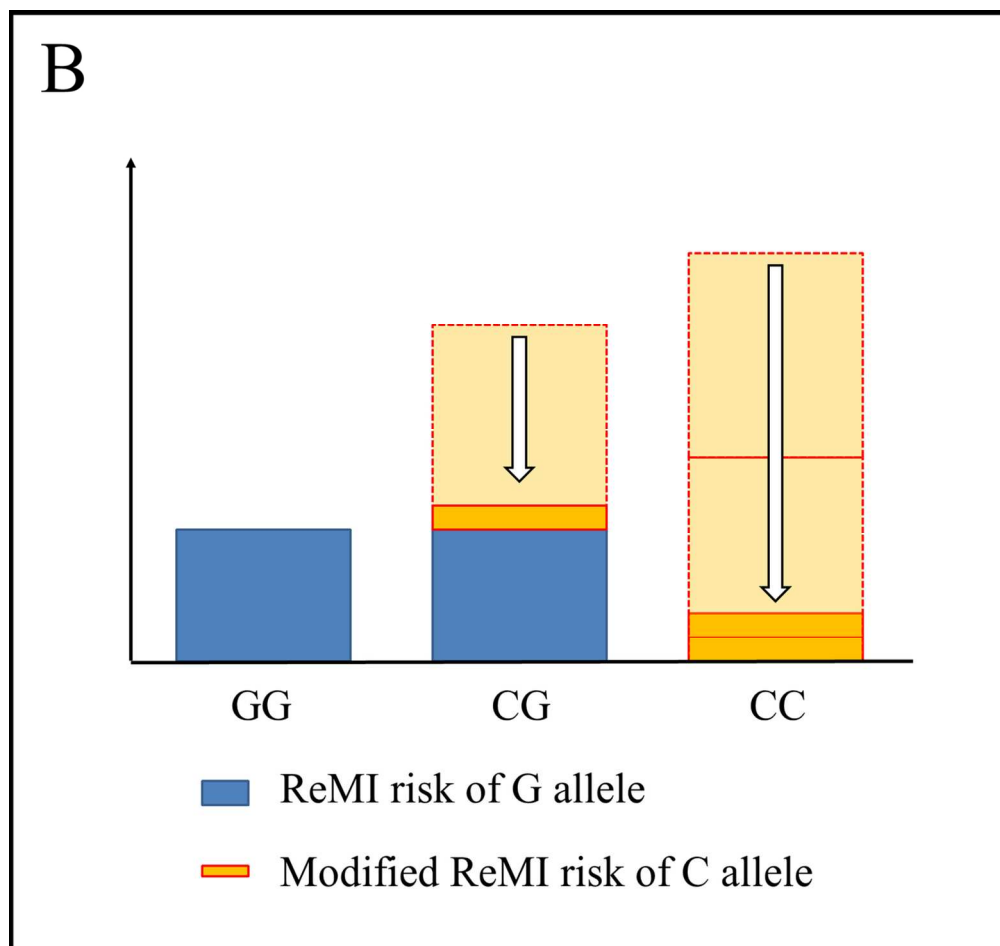

A possible mechanism for the differential impact of rs1333049 genotypes between the primary and secondary prevention settings. (A) Risk of first acute myocardial infarction (AMI) in the primary prevention setting. (B) Risk of re-myocardial infarction (ReMI) in the secondary prevention setting. Blue and yellow bars indicate the susceptibility risks of G (dominant risk) and C (additive risk) alleles, respectively. In this model, it is assumed that the risk of rs1333049 G allele was not changed between primary and secondary prevention settings, while the risk of rs1333049 C allele was reduced by the secondary prevention programs after AMI. In the primary prevention setting (panel A), the risk of C allele overwhelmed the G allele risk, making an “additive risk model” of C allele, in which the total risk increased as the number of C allele increased. On the other hand, in the secondary prevention setting (panel B), the risk of rs1333049 C allele was reduced and then the risk of G allele became highlighted, making a so-called “dominant risk model” of rs1333049 G allele.

119x112mm (300 x 300 DPI)

## STROBE Statement—checklist of items that should be included in reports of observational studies

|                              | Item No | Recommendation                                                                                                                                                                                                                                                                                                                                                                                                                                                                                                                                                                                                                                                                                   |
|------------------------------|---------|--------------------------------------------------------------------------------------------------------------------------------------------------------------------------------------------------------------------------------------------------------------------------------------------------------------------------------------------------------------------------------------------------------------------------------------------------------------------------------------------------------------------------------------------------------------------------------------------------------------------------------------------------------------------------------------------------|
| <b>Title and abstract</b>    | 1       | (a) Indicate the study's design with a commonly used term in the title or the abstract<br>(b) Provide in the abstract an informative and balanced summary of what was done and what was found                                                                                                                                                                                                                                                                                                                                                                                                                                                                                                    |
| <b>Introduction</b>          |         |                                                                                                                                                                                                                                                                                                                                                                                                                                                                                                                                                                                                                                                                                                  |
| Background/rationale         | 2       | Explain the scientific background and rationale for the investigation being reported                                                                                                                                                                                                                                                                                                                                                                                                                                                                                                                                                                                                             |
| Objectives                   | 3       | State specific objectives, including any prespecified hypotheses                                                                                                                                                                                                                                                                                                                                                                                                                                                                                                                                                                                                                                 |
| <b>Methods</b>               |         |                                                                                                                                                                                                                                                                                                                                                                                                                                                                                                                                                                                                                                                                                                  |
| Study design                 | 4       | Present key elements of study design early in the paper                                                                                                                                                                                                                                                                                                                                                                                                                                                                                                                                                                                                                                          |
| Setting                      | 5       | Describe the setting, locations, and relevant dates, including periods of recruitment, exposure, follow-up, and data collection                                                                                                                                                                                                                                                                                                                                                                                                                                                                                                                                                                  |
| Participants                 | 6       | (a) <i>Cohort study</i> —Give the eligibility criteria, and the sources and methods of selection of participants. Describe methods of follow-up<br><i>Case-control study</i> —Give the eligibility criteria, and the sources and methods of case ascertainment and control selection. Give the rationale for the choice of cases and controls<br><i>Cross-sectional study</i> —Give the eligibility criteria, and the sources and methods of selection of participants<br>(b) <i>Cohort study</i> —For matched studies, give matching criteria and number of exposed and unexposed<br><i>Case-control study</i> —For matched studies, give matching criteria and the number of controls per case |
| Variables                    | 7       | Clearly define all outcomes, exposures, predictors, potential confounders, and effect modifiers. Give diagnostic criteria, if applicable                                                                                                                                                                                                                                                                                                                                                                                                                                                                                                                                                         |
| Data sources/<br>measurement | 8*      | For each variable of interest, give sources of data and details of methods of assessment (measurement). Describe comparability of assessment methods if there is more than one group                                                                                                                                                                                                                                                                                                                                                                                                                                                                                                             |
| Bias                         | 9       | Describe any efforts to address potential sources of bias                                                                                                                                                                                                                                                                                                                                                                                                                                                                                                                                                                                                                                        |
| Study size                   | 10      | Explain how the study size was arrived at                                                                                                                                                                                                                                                                                                                                                                                                                                                                                                                                                                                                                                                        |
| Quantitative variables       | 11      | Explain how quantitative variables were handled in the analyses. If applicable, describe which groupings were chosen and why                                                                                                                                                                                                                                                                                                                                                                                                                                                                                                                                                                     |
| Statistical methods          | 12      | (a) Describe all statistical methods, including those used to control for confounding<br>(b) Describe any methods used to examine subgroups and interactions<br>(c) Explain how missing data were addressed<br>(d) <i>Cohort study</i> —If applicable, explain how loss to follow-up was addressed<br><i>Case-control study</i> —If applicable, explain how matching of cases and controls was addressed<br><i>Cross-sectional study</i> —If applicable, describe analytical methods taking account of sampling strategy<br>(e) Describe any sensitivity analyses                                                                                                                                |

Continued on next page

**Results**

|                  |     |                                                                                                                                                                                                                                                                                                                                                                                                               |
|------------------|-----|---------------------------------------------------------------------------------------------------------------------------------------------------------------------------------------------------------------------------------------------------------------------------------------------------------------------------------------------------------------------------------------------------------------|
| Participants     | 13* | (a) Report numbers of individuals at each stage of study—eg numbers potentially eligible, examined for eligibility, confirmed eligible, included in the study, completing follow-up, and analysed<br>(b) Give reasons for non-participation at each stage<br>(c) Consider use of a flow diagram                                                                                                               |
| Descriptive data | 14* | (a) Give characteristics of study participants (eg demographic, clinical, social) and information on exposures and potential confounders<br>(b) Indicate number of participants with missing data for each variable of interest<br>(c) <i>Cohort study</i> —Summarise follow-up time (eg, average and total amount)                                                                                           |
| Outcome data     | 15* | <i>Cohort study</i> —Report numbers of outcome events or summary measures over time<br><i>Case-control study</i> —Report numbers in each exposure category, or summary measures of exposure<br><i>Cross-sectional study</i> —Report numbers of outcome events or summary measures                                                                                                                             |
| Main results     | 16  | (a) Give unadjusted estimates and, if applicable, confounder-adjusted estimates and their precision (eg, 95% confidence interval). Make clear which confounders were adjusted for and why they were included<br>(b) Report category boundaries when continuous variables were categorized<br>(c) If relevant, consider translating estimates of relative risk into absolute risk for a meaningful time period |
| Other analyses   | 17  | Report other analyses done—eg analyses of subgroups and interactions, and sensitivity analyses                                                                                                                                                                                                                                                                                                                |

**Discussion**

|                  |    |                                                                                                                                                                            |
|------------------|----|----------------------------------------------------------------------------------------------------------------------------------------------------------------------------|
| Key results      | 18 | Summarise key results with reference to study objectives                                                                                                                   |
| Limitations      | 19 | Discuss limitations of the study, taking into account sources of potential bias or imprecision. Discuss both direction and magnitude of any potential bias                 |
| Interpretation   | 20 | Give a cautious overall interpretation of results considering objectives, limitations, multiplicity of analyses, results from similar studies, and other relevant evidence |
| Generalisability | 21 | Discuss the generalisability (external validity) of the study results                                                                                                      |

**Other information**

|         |    |                                                                                                                                                               |
|---------|----|---------------------------------------------------------------------------------------------------------------------------------------------------------------|
| Funding | 22 | Give the source of funding and the role of the funders for the present study and, if applicable, for the original study on which the present article is based |
|---------|----|---------------------------------------------------------------------------------------------------------------------------------------------------------------|

\*Give information separately for cases and controls in case-control studies and, if applicable, for exposed and unexposed groups in cohort and cross-sectional studies.

**Note:** An Explanation and Elaboration article discusses each checklist item and gives methodological background and published examples of transparent reporting. The STROBE checklist is best used in conjunction with this article (freely available on the Web sites of PLoS Medicine at <http://www.plosmedicine.org/>, Annals of Internal Medicine at <http://www.annals.org/>, and Epidemiology at <http://www.epidem.com/>). Information on the STROBE Initiative is available at [www.strobe-statement.org](http://www.strobe-statement.org).
